# Supplementary material for: Ex Vivo Profiling of PD-1 Blockade Using Organotypic Tumor Spheroids
Source: Oxford University Press journal article supplement (doi:10.1158/2159-8290.cd-17-0833), 2017-11-03
Supplement: 21598290cd170833-sup-186804_2_supp_4355513_lyg2ld.xlsx [file 21598290cd170833-sup-186804_2_supp_4355513_lyg2ld.xlsx]

## Sheet: S4a_SKCM TCGA_2way
Table S4a
Melenoma TCGA				Log2 Transformed and Scaled Data from RPKM (Reads Per Kilobase of transcript per Million mapped reads)
		Patient	CXCL13	CCL19	status	time	metastatic	rank
		TCGA-3N-A9WC-06	1.61037	1.26205	0	212	Regional Lymph Node	H
		TCGA-3N-A9WD-06	0.983587	1.81441	1	212	Regional Lymph Node	H
		TCGA-BF-A1PX-01	0.852603	0.768226	1	282	Primary Tumor	H
		TCGA-BF-A1Q0-01	0.344372	0.500314	0	17	Primary Tumor	H
		TCGA-BF-A5EQ-01	0.745411	0.925878	0	12	Primary Tumor	H
		TCGA-BF-AAOU-01	1.28355	-0.993345	0	13	Primary Tumor	H
		TCGA-BF-AAP0-06	1.69742	1.9384	0	14	Regional Lymph Node	H
		TCGA-BF-AAP4-01	0.707322	0.155726	0	15	Primary Tumor	H
		TCGA-BF-AAP7-01	0.561182	-0.0806982	0	15	Primary Tumor	H
		TCGA-D3-A1Q3-06	0.700588	1.58804	1	259	Regional Lymph Node	H
		TCGA-D3-A1Q4-06	-0.188218	0.538042	0	2856	Regional Lymph Node	H
		TCGA-D3-A1Q7-06	0.678545	0.831003	0	3004	Regional Lymph Node	H
		TCGA-D3-A1Q9-06	0.742404	-0.143687	1	686	Regional Lymph Node	H
		TCGA-D3-A1QB-06	1.57763	0.732469	0	2071	Regional Lymph Node	H
		TCGA-D3-A2J7-06	0.61093	0.378294	1	2595	Regional Lymph Node	H
		TCGA-D3-A2J8-06	0.628328	1.91403	1	255	Regional Lymph Node	H
		TCGA-D3-A2J9-06	1.63484	2.2729	1	643	Regional Lymph Node	H
		TCGA-D3-A2JB-06	1.48559	2.06797	1	2075	Regional Lymph Node	H
		TCGA-D3-A2JD-06	0.861293	1.78648	1	347	Regional Lymph Node	H
		TCGA-D3-A2JF-06	0.53546	1.42909	0	939	Distant Metastasis	H
		TCGA-D3-A2JH-06	1.47569	0.174415	0	772	Regional Cutaneous or Subcutaneous Tissue (includes satellite and in-transit metastasis)	H
		TCGA-D3-A2JL-06	1.25783	1.41894	0	2349	Regional Lymph Node	H
		TCGA-D3-A2JN-06	0.960325	1.25638	0	1709	Regional Lymph Node	H
		TCGA-D3-A2JO-06	1.29654	0.0240497	0	1498	Regional Cutaneous or Subcutaneous Tissue (includes satellite and in-transit metastasis)	H
		TCGA-D3-A2JP-06	0.982799	0.966919	0	1372	Regional Lymph Node	H
		TCGA-D3-A3BZ-06	0.955923	2.02676	0	3028	Regional Lymph Node	H
		TCGA-D3-A3C3-06	-0.0973995	1.23635	0	-5	Regional Lymph Node	H
		TCGA-D3-A3C7-06	1.10505	0.0120245	0	1007	Regional Lymph Node	H
		TCGA-D3-A3C8-06	2.85839	0.972488	0	1038	Regional Cutaneous or Subcutaneous Tissue (includes satellite and in-transit metastasis)	H
		TCGA-D3-A3CB-06	0.998895	1.5253	0	1949	Regional Lymph Node	H
		TCGA-D3-A3CE-06	0.169551	0.525088	1	405	Regional Lymph Node	H
		TCGA-D3-A3CF-06	1.16324	1.93645	1	730	Regional Lymph Node	H
		TCGA-D3-A3MR-06	1.15846	1.89261	0	2724	Regional Cutaneous or Subcutaneous Tissue (includes satellite and in-transit metastasis)	H
		TCGA-D3-A3MU-06	-0.0230933	0.874463	0	412	Regional Lymph Node	H
		TCGA-D3-A51E-06	0.855961	-0.580247	0	2440	Regional Cutaneous or Subcutaneous Tissue (includes satellite and in-transit metastasis)	H
		TCGA-D3-A51F-06	2.34357	0.629856	0	1299	Regional Lymph Node	H
		TCGA-D3-A51H-06	2.60882	2.02973	0	459	Regional Lymph Node	H
		TCGA-D3-A51J-06	1.06046	1.08982	0	1250	Regional Cutaneous or Subcutaneous Tissue (includes satellite and in-transit metastasis)	H
		TCGA-D3-A51K-06	1.00472	-0.745655	0	539	Regional Lymph Node	H
		TCGA-D3-A51N-06	-0.144624	1.34147	0	269	Regional Lymph Node	H
		TCGA-D3-A51T-06	0.716269	0.204625	0	424	Regional Lymph Node	H
		TCGA-D3-A5GN-06	0.834636	-0.0952913	0	1582	Regional Lymph Node	H
		TCGA-D3-A5GR-06	0.744761	2.04957	0	47	Regional Lymph Node	H
		TCGA-D3-A8GB-06	1.27221	1.29488	1	904	Regional Lymph Node	H
		TCGA-D3-A8GD-06	1.66709	1.49204	0	311	Regional Lymph Node	H
		TCGA-D3-A8GE-06	1.04996	-0.574362	0	462	Regional Cutaneous or Subcutaneous Tissue (includes satellite and in-transit metastasis)	H
		TCGA-D3-A8GJ-06	1.42899	0.0433594	0	4333	Distant Metastasis	H
		TCGA-D3-A8GM-06	0.382228	1.17111	0	2301	Regional Lymph Node	H
		TCGA-D3-A8GN-06	0.922672	-0.406654	0	3418	Distant Metastasis	H
		TCGA-D3-A8GO-06	1.82001	1.97894	1	1022	Regional Lymph Node	H
		TCGA-D3-A8GS-06	-0.114034	0.670567	1	732	Distant Metastasis	H
		TCGA-D9-A3Z1-06	1.09013	-0.251174	0	122	Regional Lymph Node	H
		TCGA-D9-A3Z3-06	1.10341	1.38224	0	88	Regional Lymph Node	H
		TCGA-D9-A3Z4-01	-0.00365626	0.276038	0	119	Primary Tumor	H
		TCGA-D9-A6E9-06	1.88578	1.23858	0	-5	Primary Tumor	H
		TCGA-DA-A1HV-06	1.02676	0.762842	0	23	Regional Lymph Node	H
		TCGA-DA-A1HW-06	0.648019	1.07833	0	52	Regional Lymph Node	H
		TCGA-DA-A1I0-06	-0.574044	2.06973	0	26	Regional Cutaneous or Subcutaneous Tissue (includes satellite and in-transit metastasis)	H
		TCGA-DA-A1I1-06	0.55971	0.659335	0	96	Regional Cutaneous or Subcutaneous Tissue (includes satellite and in-transit metastasis)	H
		TCGA-DA-A1I2-06	0.287778	0.420215	1	40	Regional Lymph Node	H
		TCGA-DA-A1I5-06	0.705896	1.681	0	988	Distant Metastasis	H
		TCGA-DA-A1IB-06	1.93637	2.71993	0	40	Regional Lymph Node	H
		TCGA-DA-A3F2-06	0.781579	0.306082	0	6	Regional Cutaneous or Subcutaneous Tissue (includes satellite and in-transit metastasis)	H
		TCGA-DA-A3F8-06	1.73708	1.0321	0	451	Regional Lymph Node	H
		TCGA-DA-A95V-06	0.0793719	1.48017	0	34	Regional Lymph Node	H
		TCGA-EB-A299-01	-0.0461295	0.410305	0	0	Primary Tumor	H
		TCGA-EB-A3XC-01	0.550187	-0.0276367	0	9	Primary Tumor	H
		TCGA-EB-A3XD-01	-0.580117	1.98382	0	0	Primary Tumor	H
		TCGA-EB-A3XE-01	-0.462997	0.702514	0	0	Primary Tumor	H
		TCGA-EB-A430-01	0.433629	-0.228287	0	-2	Primary Tumor	H
		TCGA-EB-A44N-01	0.510017	1.14724	0	45	Primary Tumor	H
		TCGA-EB-A44Q-06	0.458211	0.839215	0	6	Regional Lymph Node	H
		TCGA-EB-A4IS-01	1.48017	1.23557	0	0	Primary Tumor	H
		TCGA-EB-A4OZ-01	0.572056	0.85336	0	-3	Primary Tumor	H
		TCGA-EB-A4XL-01	0.278663	0.644236	0	0	Primary Tumor	H
		TCGA-EB-A551-01	1.45475	0.0828307	0	8	Primary Tumor	H
		TCGA-EB-A553-01	-0.511651	0.956152	0	13	Primary Tumor	H
		TCGA-EB-A57M-01	-0.0991198	0.614124	0	8	Primary Tumor	H
		TCGA-EB-A5SG-06	1.98611	1.20821	0	0	Regional Lymph Node	H
		TCGA-EB-A5SH-06	-0.512998	1.89449	0	0	Regional Lymph Node	H
		TCGA-EB-A5UL-06	0.950841	0.884597	0	-12	Regional Lymph Node	H
		TCGA-EB-A5UM-01	0.509465	0.976763	0	0	Primary Tumor	H
		TCGA-EB-A5VV-06	2.7655	2.65372	0	-5	Regional Lymph Node	H
		TCGA-EB-A6L9-06	0.93093	2.63305	0	6	Regional Lymph Node	H
		TCGA-EB-A6R0-01	0.969615	-0.825703	0	-2	Primary Tumor	H
		TCGA-EB-A82B-01	0.61149	0.60647	0	4	Primary Tumor	H
		TCGA-EB-A85I-01	0.891738	-0.673894	0	-5	Primary Tumor	H
		TCGA-EB-A85J-01	1.17231	-0.0522062	0	-6	Primary Tumor	H
		TCGA-EE-A181-06	0.903878	1.14277	1	34	Regional Lymph Node	H
		TCGA-EE-A183-06	0.538196	2.13328	1	371	Regional Lymph Node	H
		TCGA-EE-A184-06	0.575765	0.0216103	1	156	Distant Metastasis	H
		TCGA-EE-A20F-06	0.332729	0.872689	0	96	Regional Lymph Node	H
		TCGA-EE-A20I-06	0.323868	0.112446	1	36	Regional Cutaneous or Subcutaneous Tissue (includes satellite and in-transit metastasis)	H
		TCGA-EE-A29G-06	-0.311463	0.645326	1	260	Regional Cutaneous or Subcutaneous Tissue (includes satellite and in-transit metastasis)	H
		TCGA-EE-A29H-06	0.162286	1.12034	0	134	Regional Lymph Node	H
		TCGA-EE-A29M-06	0.300402	0.968388	0	825	Regional Lymph Node	H
		TCGA-EE-A29N-06	1.51651	1.61102	1	289	Regional Lymph Node	H
		TCGA-EE-A29P-06	1.44094	0.499222	0	366	Regional Lymph Node	H
		TCGA-EE-A29X-06	-0.17637	0.442252	1	246	Regional Lymph Node	H
		TCGA-EE-A2A0-06	0.890538	0.355483	1	344	Regional Lymph Node	H
		TCGA-EE-A2A1-06	0.925182	1.82905	0	769	Regional Lymph Node	H
		TCGA-EE-A2A2-06	0.346621	0.846212	0	727	Regional Lymph Node	H
		TCGA-EE-A2A6-06	1.21552	0.852367	0	272	Regional Lymph Node	H
		TCGA-EE-A2GC-06	2.00676	-0.622518	0	308	Regional Lymph Node	H
		TCGA-EE-A2GD-06	1.80023	-0.843103	0	547	Regional Cutaneous or Subcutaneous Tissue (includes satellite and in-transit metastasis)	H
		TCGA-EE-A2GE-06	1.10018	0.324236	0	1062	Regional Lymph Node	H
		TCGA-EE-A2GH-06	1.60417	0.30953	0	644	Regional Lymph Node	H
		TCGA-EE-A2GI-06	1.31856	0.561726	0	119	Regional Lymph Node	H
		TCGA-EE-A2GJ-06	1.08997	-0.00088465	0	591	Regional Lymph Node	H
		TCGA-EE-A2GK-06	2.91285	2.47168	0	487	Regional Lymph Node	H
		TCGA-EE-A2GL-06	1.5455	1.93609	0	331	Regional Lymph Node	H
		TCGA-EE-A2GT-06	0.509693	1.99422	0	294	Regional Lymph Node	H
		TCGA-EE-A2GU-06	0.94122	-0.339424	0	264	Regional Lymph Node	H
		TCGA-EE-A2M7-06	0.493035	0.639806	1	82	Regional Lymph Node	H
		TCGA-EE-A2M8-06	1.59991	0.491447	1	188	Regional Lymph Node	H
		TCGA-EE-A2MC-06	0.729807	0.262835	1	1445	Regional Lymph Node	H
		TCGA-EE-A2MD-06	0.446234	0.594592	1	290	Regional Lymph Node	H
		TCGA-EE-A2ME-06	1.69588	2.11501	1	896	Regional Lymph Node	H
		TCGA-EE-A2MG-06	1.48988	2.1381	1	1346	Regional Lymph Node	H
		TCGA-EE-A2MH-06	0.666982	1.71355	1	242	Regional Lymph Node	H
		TCGA-EE-A2MJ-06	1.53023	1.78938	1	1929	Regional Lymph Node	H
		TCGA-EE-A2MK-06	0.406815	-0.223918	0	3400	Regional Lymph Node	H
		TCGA-EE-A2ML-06	-0.217473	0.794243	0	3404	Regional Lymph Node	H
		TCGA-EE-A2MN-06	0.615947	0.347124	1	763	Regional Lymph Node	H
		TCGA-EE-A2MR-06	1.38638	1.85114	0	902	Regional Lymph Node	H
		TCGA-EE-A2MU-06	1.01356	0.193165	0	169	Regional Cutaneous or Subcutaneous Tissue (includes satellite and in-transit metastasis)	H
		TCGA-EE-A3AA-06	1.2209	1.89114	0	3781	Regional Lymph Node	H
		TCGA-EE-A3AC-06	0.769073	0.116822	0	786	Regional Lymph Node	H
		TCGA-EE-A3AE-06	2.7615	0.0644253	0	72	Regional Lymph Node	H
		TCGA-EE-A3AF-06	0.163987	0.232948	1	420	Regional Lymph Node	H
		TCGA-EE-A3J3-06	-0.0219615	0.617617	1	98	Regional Cutaneous or Subcutaneous Tissue (includes satellite and in-transit metastasis)	H
		TCGA-EE-A3J5-06	1.04808	0.659648	1	657	Regional Cutaneous or Subcutaneous Tissue (includes satellite and in-transit metastasis)	H
		TCGA-EE-A3JA-06	0.640905	-0.00849407	1	676	Regional Lymph Node	H
		TCGA-EE-A3JD-06	2.13896	1.98612	1	832	Regional Lymph Node	H
		TCGA-EE-A3JE-06	1.92378	0.621678	0	14	Regional Cutaneous or Subcutaneous Tissue (includes satellite and in-transit metastasis)	H
		TCGA-EE-A3JH-06	0.975972	1.99629	0	424	Regional Lymph Node	H
		TCGA-ER-A193-06	1.09209	0.841408	1	955	Regional Lymph Node	H
		TCGA-ER-A194-01	0.184266	0.99165	1	1276	Primary Tumor	H
		TCGA-ER-A195-06	0.0346133	0.636826	1	566	Regional Lymph Node	H
		TCGA-ER-A199-06	1.15284	1.22341	1	174	Regional Lymph Node	H
		TCGA-ER-A19A-06	1.82814	0.714151	0	2324	Regional Cutaneous or Subcutaneous Tissue (includes satellite and in-transit metastasis)	H
		TCGA-ER-A19D-06	0.391875	0.230666	1	107	Regional Cutaneous or Subcutaneous Tissue (includes satellite and in-transit metastasis)	H
		TCGA-ER-A19G-06	-0.115983	0.610275	0	3472	Regional Lymph Node	H
		TCGA-ER-A19M-06	1.11361	-0.396342	1	870	Regional Lymph Node	H
		TCGA-ER-A19N-06	1.1963	1.31738	0	1303	Regional Lymph Node	H
		TCGA-ER-A19P-06	1.13176	1.74818	1	1055	Regional Lymph Node	H
		TCGA-ER-A19S-06	1.30816	0.756377	0	1097	Regional Lymph Node	H
		TCGA-ER-A19W-06	1.78779	0.855761	1	539	Regional Cutaneous or Subcutaneous Tissue (includes satellite and in-transit metastasis)	H
		TCGA-ER-A1A1-06	1.91811	1.2253	0	2386	Regional Lymph Node	H
		TCGA-ER-A2NF-01	0.878915	0.578043	0	398	Primary Tumor	H
		TCGA-ER-A2NF-06	1.04533	-0.533667	0	398	Primary Tumor	H
		TCGA-ER-A2NG-06	1.3115	-0.322726	0	384	Regional Lymph Node	H
		TCGA-ER-A2NH-06	1.80032	0.793362	0	357	Regional Lymph Node	H
		TCGA-ER-A3ET-06	0.292329	-0.0471002	0	200	Regional Cutaneous or Subcutaneous Tissue (includes satellite and in-transit metastasis)	H
		TCGA-ER-A42L-06	0.56049	-0.205964	0	423	Distant Metastasis	H
		TCGA-FR-A3YN-06	0.574249	-0.0506485	0	181	Regional Lymph Node	H
		TCGA-FR-A44A-06	0.984128	0.746268	0	2195	Regional Lymph Node	H
		TCGA-FR-A729-06	1.04353	1.19066	0	204	Regional Lymph Node	H
		TCGA-FR-A7U9-06	0.478098	0.533924	0	163	Regional Lymph Node	H
		TCGA-FR-A7UA-06	1.84917	0.753518	0	41	Regional Lymph Node	H
		TCGA-FR-A8YE-06	0.587684	1.82572	0	100	Regional Lymph Node	H
		TCGA-FS-A1Z0-06	0.646275	-0.149403	1	724	Distant Metastasis	H
		TCGA-FS-A1Z4-06	1.19903	1.95504	1	472	Regional Lymph Node	H
		TCGA-FS-A1ZA-06	0.247952	0.244553	1	222	Distant Metastasis	H
		TCGA-FS-A1ZB-06	-0.951106	1.37375	1	103	Distant Metastasis	H
		TCGA-FS-A1ZH-06	0.86572	1.01775	1	939	Regional Lymph Node	H
		TCGA-FS-A1ZM-06	1.05133	-0.486999	0	1441	Regional Cutaneous or Subcutaneous Tissue (includes satellite and in-transit metastasis)	H
		TCGA-FS-A1ZP-06	0.255789	0.724069	1	1584	Regional Lymph Node	H
		TCGA-FS-A1ZT-06	0.166378	0.5494	0	1236	Distant Metastasis	H
		TCGA-FS-A1ZW-06	0.807595	0.0851751	0	833	Regional Lymph Node	H
		TCGA-FS-A4F4-06	-0.0978089	0.353557	1	224	Regional Cutaneous or Subcutaneous Tissue (includes satellite and in-transit metastasis)	H
		TCGA-FS-A4F8-06	0.971491	2.32306	1	432	Regional Lymph Node	H
		TCGA-FW-A3R5-06	0.850553	1.06892	0	30	Regional Lymph Node	H
		TCGA-FW-A3TV-06	0.347514	0.372967	0	5	Regional Lymph Node	H
		TCGA-FW-A5DY-06	2.03277	1.85991	0	13	Regional Lymph Node	H
		TCGA-GF-A4EO-06	0.648045	1.65345	0	220	Regional Lymph Node	H
		TCGA-GF-A6C8-06	-0.0905187	0.7056	0	26	Regional Lymph Node	H
		TCGA-GF-A6C9-06	1.81201	1.53723	0	353	Distant Metastasis	H
		TCGA-GN-A263-01	0.999333	-0.183118	1	467	Primary Tumor	H
		TCGA-GN-A265-06	1.43381	1.4843	0	2577	Regional Lymph Node	H
		TCGA-GN-A266-06	0.980075	0.132039	1	308	Regional Cutaneous or Subcutaneous Tissue (includes satellite and in-transit metastasis)	H
		TCGA-GN-A267-06	0.98017	-0.406162	1	494	Regional Lymph Node	H
		TCGA-GN-A26C-01	1.83549	1.63581	1	730	Primary Tumor	H
		TCGA-GN-A4U5-01	1.40617	0.246004	0	707	Primary Tumor	H
		TCGA-GN-A4U8-06	1.02083	1.35068	0	360	Regional Lymph Node	H
		TCGA-GN-A9SD-06	1.37901	1.84812	1	441	Regional Lymph Node	H
		TCGA-HR-A2OG-06	0.0479162	0.402303	0	7	Distant Metastasis	H
		TCGA-HR-A2OH-06	1.55914	0.770006	1	481	Distant Metastasis	H
		TCGA-QB-A6FS-06	0.717813	2.02133	0	176	Regional Lymph Node	H
		TCGA-QB-AA9O-06	1.24137	-0.0234356	1	549	Regional Lymph Node	H
		TCGA-W3-A824-06	0.808101	-0.253275	0	4994	Regional Lymph Node	H
		TCGA-W3-A825-06	0.755754	-0.236604	1	273	Distant Metastasis	H
		TCGA-W3-AA1Q-06	0.12483	0.586267	1	1219	Distant Metastasis	H
		TCGA-W3-AA1W-06	1.66627	1.52121	0	5267	Distant Metastasis	H
		TCGA-WE-A8K1-06	1.11775	0.655385	0	167	Regional Cutaneous or Subcutaneous Tissue (includes satellite and in-transit metastasis)	H
		TCGA-WE-A8K4-01	1.67021	-0.763038	0	306	Primary Tumor	H
		TCGA-WE-A8ZN-06	0.0865895	1.01964	0	371	Regional Cutaneous or Subcutaneous Tissue (includes satellite and in-transit metastasis)	H
		TCGA-WE-A8ZX-06	0.948585	0.377066	0	664	Regional Lymph Node	H
		TCGA-WE-AA9Y-06	0.966148	1.3	0	33	Regional Lymph Node	H
		TCGA-WE-AAA0-06	1.03353	1.02573	0	607	Regional Lymph Node	H
		TCGA-WE-AAA4-06	0.975117	0.198904	0	367	Regional Cutaneous or Subcutaneous Tissue (includes satellite and in-transit metastasis)	H
		TCGA-XV-AAZY-01	-0.14146	1.69584	0	13	Primary Tumor	H
		TCGA-YD-A9TA-06	0.618844	0.054035	0	570	Distant Metastasis	H
		TCGA-YG-AA3N-01	1.16306	-0.550524	0	201	Primary Tumor	H
		TCGA-Z2-A8RT-06	0.146693	0.738115	0	250	Regional Cutaneous or Subcutaneous Tissue (includes satellite and in-transit metastasis)	H
		TCGA-Z2-AA3V-06	-0.0267447	2.33113	0	182	Regional Lymph Node	H
		TCGA-3N-A9WB-06	-1.26686	-1.03869	1	92	Distant Metastasis	L
		TCGA-BF-A1PU-01	-0.859231	-0.483866	0	387	Primary Tumor	L
		TCGA-BF-A1PV-01	-0.787585	-1.13325	0	14	Primary Tumor	L
		TCGA-BF-A1PZ-01	-0.134958	-0.241139	0	12	Primary Tumor	L
		TCGA-BF-A3DJ-01	-0.670074	-1.14647	0	464	Primary Tumor	L
		TCGA-BF-A3DL-01	-1.1718	-0.751576	0	28	Primary Tumor	L
		TCGA-BF-A3DM-01	-1.08849	-1.27648	0	14	Primary Tumor	L
		TCGA-BF-A3DN-01	-0.971851	0.292431	0	32	Primary Tumor	L
		TCGA-BF-A5EO-01	-0.356123	-0.550233	0	338	Primary Tumor	L
		TCGA-BF-A5EP-01	-1.15001	-1.2252	0	11	Primary Tumor	L
		TCGA-BF-A5ER-01	-1.34199	-0.555212	0	12	Primary Tumor	L
		TCGA-BF-A5ES-01	-0.066073	0.0676988	0	19	Primary Tumor	L
		TCGA-BF-A9VF-01	-1.07167	-0.761322	0	12	Primary Tumor	L
		TCGA-BF-AAOX-01	-0.348357	0.414949	0	11	Primary Tumor	L
		TCGA-BF-AAP1-01	-1.02112	-0.992779	0	14	Primary Tumor	L
		TCGA-BF-AAP2-01	-0.61338	0.550694	0	13	Primary Tumor	L
		TCGA-BF-AAP6-01	-1.14149	-0.781242	0	15	Primary Tumor	L
		TCGA-BF-AAP8-01	-0.89627	-1.12812	0	14	Primary Tumor	L
		TCGA-D3-A1Q1-06	-1.26394	-1.20568	1	501	Regional Lymph Node	L
		TCGA-D3-A1Q5-06	-1.35265	-0.888476	1	986	Regional Lymph Node	L
		TCGA-D3-A1Q6-06	0.103625	-1.20395	1	2134	Regional Cutaneous or Subcutaneous Tissue (includes satellite and in-transit metastasis)	L
		TCGA-D3-A1Q8-06	-0.449634	0.391198	1	854	Regional Lymph Node	L
		TCGA-D3-A1QA-06	-0.171661	-0.0216813	0	955	Regional Lymph Node	L
		TCGA-D3-A1QA-07	-0.0653138	0.0944818	0	955	Regional Lymph Node	L
		TCGA-D3-A2J6-06	0.367918	-1.25203	1	313	Regional Lymph Node	L
		TCGA-D3-A2JA-06	0.887268	-1.01793	0	2282	Regional Cutaneous or Subcutaneous Tissue (includes satellite and in-transit metastasis)	L
		TCGA-D3-A2JC-06	0.0933035	-0.0808447	0	2126	Regional Lymph Node	L
		TCGA-D3-A2JE-06	-0.548166	0.351505	1	701	Regional Lymph Node	L
		TCGA-D3-A2JG-06	-0.125517	-0.291105	1	228	Regional Lymph Node	L
		TCGA-D3-A2JK-06	-1.36759	0.905519	1	192	Regional Lymph Node	L
		TCGA-D3-A3C1-06	-0.214708	0.194115	0	26	Regional Lymph Node	L
		TCGA-D3-A3C6-06	-1.2467	-1.01227	1	464	Regional Lymph Node	L
		TCGA-D3-A3CC-06	-1.18789	-0.12324	0	1391	Regional Cutaneous or Subcutaneous Tissue (includes satellite and in-transit metastasis)	L
		TCGA-D3-A3ML-06	-1.29934	-1.12381	1	192	Regional Lymph Node	L
		TCGA-D3-A3MO-06	-1.31964	-1.27648	1	284	Regional Cutaneous or Subcutaneous Tissue (includes satellite and in-transit metastasis)	L
		TCGA-D3-A3MV-06	-1.31659	-1.19879	0	164	Regional Cutaneous or Subcutaneous Tissue (includes satellite and in-transit metastasis)	L
		TCGA-D3-A51G-06	0.261706	-1.26713	0	5267	Regional Cutaneous or Subcutaneous Tissue (includes satellite and in-transit metastasis)	L
		TCGA-D3-A51R-06	-1.29872	-1.17251	0	623	Regional Lymph Node	L
		TCGA-D3-A5GL-06	-0.818428	-1.07215	0	2901	Regional Lymph Node	L
		TCGA-D3-A5GO-06	0.394022	-0.337137	0	1456	Distant Metastasis	L
		TCGA-D3-A5GS-06	0.341178	-0.483302	0	212	Regional Lymph Node	L
		TCGA-D3-A5GT-01	-1.25741	-0.756617	0	154	Primary Tumor	L
		TCGA-D3-A5GU-06	-0.116731	-0.217588	0	703	Regional Lymph Node	L
		TCGA-D3-A8GC-06	-0.602925	-0.564789	1	671	Regional Lymph Node	L
		TCGA-D3-A8GI-06	-1.19329	-0.0678209	1	127	Regional Lymph Node	L
		TCGA-D3-A8GK-06	-1.30278	-1.242	0	2889	Distant Metastasis	L
		TCGA-D3-A8GL-06	-1.24905	-1.17321	1	1184	Regional Cutaneous or Subcutaneous Tissue (includes satellite and in-transit metastasis)	L
		TCGA-D3-A8GP-06	-0.769135	-1.21311	0	2665	Distant Metastasis	L
		TCGA-D3-A8GQ-06	-0.40973	-1.14794	1	348	Distant Metastasis	L
		TCGA-D3-A8GR-06	-1.31561	-1.23562	1	169	Distant Metastasis	L
		TCGA-D3-A8GV-06	-0.871916	-0.664413	1	619	Distant Metastasis	L
		TCGA-D9-A4Z2-01	-1.27754	-0.6312	0	86	Primary Tumor	L
		TCGA-D9-A4Z3-01	-0.826951	-1.16626	0	104	Primary Tumor	L
		TCGA-D9-A4Z5-01	-1.33096	-1.27648	0	29	[Not Available]	L
		TCGA-D9-A4Z6-06	-0.732404	-1.1718	0	174	Regional Lymph Node	L
		TCGA-D9-A6EA-06	-1.15543	-1.04746	0	344	[Discrepancy]	L
		TCGA-D9-A6EC-06	-1.03369	-1.23237	0	402	Regional Lymph Node	L
		TCGA-D9-A6EG-06	-1.28566	-0.598939	1	444	Regional Cutaneous or Subcutaneous Tissue (includes satellite and in-transit metastasis)	L
		TCGA-DA-A1HY-06	-0.74298	-1.23702	0	1189	Regional Lymph Node	L
		TCGA-DA-A1I4-06	-1.27431	-1.02424	0	34	Regional Cutaneous or Subcutaneous Tissue (includes satellite and in-transit metastasis)	L
		TCGA-DA-A1I7-06	0.17164	-1.11173	0	750	Regional Cutaneous or Subcutaneous Tissue (includes satellite and in-transit metastasis)	L
		TCGA-DA-A1I8-06	-1.33435	-1.24194	0	124	Regional Cutaneous or Subcutaneous Tissue (includes satellite and in-transit metastasis)	L
		TCGA-DA-A1IA-06	-0.760673	-1.01875	0	32	Distant Metastasis	L
		TCGA-DA-A1IC-06	-0.821945	0.604377	0	57	Regional Cutaneous or Subcutaneous Tissue (includes satellite and in-transit metastasis)	L
		TCGA-DA-A3F3-06	-0.407838	-0.632199	0	45	Regional Lymph Node	L
		TCGA-DA-A3F5-06	-0.2211	-1.25325	0	57	Regional Lymph Node	L
		TCGA-DA-A95W-06	-0.688985	-0.285344	0	31	Regional Lymph Node	L
		TCGA-DA-A95X-06	-0.642838	-0.707749	0	31	Regional Lymph Node	L
		TCGA-DA-A95Y-06	-1.26041	0.61027	0	31	Regional Lymph Node	L
		TCGA-DA-A95Z-06	-0.745389	-0.957767	0	27	Regional Cutaneous or Subcutaneous Tissue (includes satellite and in-transit metastasis)	L
		TCGA-DA-A960-01	-1.22924	-0.716927	0	39	Regional Cutaneous or Subcutaneous Tissue (includes satellite and in-transit metastasis)	L
		TCGA-EB-A1NK-01	-0.712208	-0.482649	0	16	Primary Tumor	L
		TCGA-EB-A24C-01	-1.34516	-0.825826	0	14	Primary Tumor	L
		TCGA-EB-A24D-01	-0.199242	-0.144641	0	42	Primary Tumor	L
		TCGA-EB-A3HV-01	-1.05884	-0.53477	0	39	Primary Tumor	L
		TCGA-EB-A3XB-01	-0.0854129	-1.0058	0	36	Primary Tumor	L
		TCGA-EB-A3XF-01	-0.830477	-0.706513	0	4	Primary Tumor	L
		TCGA-EB-A3Y6-01	0.0525787	0.0190844	0	16	Primary Tumor	L
		TCGA-EB-A3Y7-01	-0.745353	-8.72e-05	0	0	Primary Tumor	L
		TCGA-EB-A41A-01	-0.939893	-0.76326	0	8	Primary Tumor	L
		TCGA-EB-A41B-01	-0.270477	-0.221153	0	3	Primary Tumor	L
		TCGA-EB-A42Y-01	-0.873937	-1.22467	0	6	Primary Tumor	L
		TCGA-EB-A42Z-01	-0.249832	-0.910848	0	12	Primary Tumor	L
		TCGA-EB-A431-01	-0.732386	-0.765978	0	52	Primary Tumor	L
		TCGA-EB-A44O-01	-0.641694	-0.850748	0	5	Primary Tumor	L
		TCGA-EB-A44P-01	-0.238623	-0.340196	0	7	Primary Tumor	L
		TCGA-EB-A44R-06	0.0372299	-0.494679	0	6	Regional Lymph Node	L
		TCGA-EB-A4IQ-01	-1.23779	-1.03388	0	4	Primary Tumor	L
		TCGA-EB-A4OY-01	-0.607651	0.220131	0	0	Primary Tumor	L
		TCGA-EB-A4P0-01	-0.124707	-0.351825	0	-2	Primary Tumor	L
		TCGA-EB-A51B-01	-0.653728	-1.21112	0	-5	Primary Tumor	L
		TCGA-EB-A550-01	-0.764589	-0.989656	0	6	Primary Tumor	L
		TCGA-EB-A5FP-01	-0.544377	-1.12874	0	-5	Primary Tumor	L
		TCGA-EB-A5KH-06	-1.15637	0.865292	0	4	Regional Lymph Node	L
		TCGA-EB-A5SE-01	-1.13051	-0.902247	0	0	Primary Tumor	L
		TCGA-EB-A5SF-01	-1.36759	-0.878033	0	0	Primary Tumor	L
		TCGA-EB-A5UN-06	-0.577255	-1.17055	0	2	Distant Metastasis	L
		TCGA-EB-A5VU-01	-0.965098	-0.957331	0	4	Primary Tumor	L
		TCGA-EB-A6QY-01	-0.524354	-0.065531	0	-5	Primary Tumor	L
		TCGA-EB-A6QZ-01	-1.15841	-0.852933	0	-3	Primary Tumor	L
		TCGA-EB-A82C-01	-0.772615	-0.735073	0	4	Primary Tumor	L
		TCGA-EB-A97M-01	-0.311155	-0.630804	0	11	Primary Tumor	L
		TCGA-EE-A17X-06	-1.00674	0.0436222	1	352	Regional Lymph Node	L
		TCGA-EE-A17Y-06	-0.0584102	-1.27648	1	321	Regional Cutaneous or Subcutaneous Tissue (includes satellite and in-transit metastasis)	L
		TCGA-EE-A17Z-06	-1.20358	-1.22587	1	192	Regional Lymph Node	L
		TCGA-EE-A180-06	-0.809562	-0.715328	1	247	Distant Metastasis	L
		TCGA-EE-A182-06	-1.04663	-0.522639	1	41	Distant Metastasis	L
		TCGA-EE-A185-06	-1.31466	-1.09223	1	131	Regional Lymph Node	L
		TCGA-EE-A20B-06	0.0524581	0.00896969	0	1097	Regional Cutaneous or Subcutaneous Tissue (includes satellite and in-transit metastasis)	L
		TCGA-EE-A20C-06	-1.27805	-1.16893	1	132	Distant Metastasis	L
		TCGA-EE-A20H-06	-0.709996	-0.916729	1	280	Distant Metastasis	L
		TCGA-EE-A29A-06	-1.32083	-1.07442	1	243	Distant Metastasis	L
		TCGA-EE-A29B-06	-1.15156	-1.1299	0	301	Distant Metastasis	L
		TCGA-EE-A29C-06	-0.744989	0.568054	0	1155	Regional Lymph Node	L
		TCGA-EE-A29D-06	-1.15535	-1.02706	1	339	Regional Lymph Node	L
		TCGA-EE-A29E-06	-1.07211	-1.11475	0	1175	Regional Lymph Node	L
		TCGA-EE-A29L-06	-1.0922	0.139971	1	33	Regional Lymph Node	L
		TCGA-EE-A29Q-06	-0.511495	-0.487221	0	246	Regional Cutaneous or Subcutaneous Tissue (includes satellite and in-transit metastasis)	L
		TCGA-EE-A29R-06	-0.687877	-0.0294595	0	269	Regional Lymph Node	L
		TCGA-EE-A29S-06	-0.215179	0.328737	0	304	Regional Lymph Node	L
		TCGA-EE-A29T-06	0.514808	-0.561858	0	197	Regional Lymph Node	L
		TCGA-EE-A29V-06	-0.983484	-0.511323	1	74	Distant Metastasis	L
		TCGA-EE-A29W-06	-1.34316	-1.05147	0	264	Regional Lymph Node	L
		TCGA-EE-A2A5-06	-1.20903	-0.188542	1	294	Regional Cutaneous or Subcutaneous Tissue (includes satellite and in-transit metastasis)	L
		TCGA-EE-A2GB-06	-0.52056	-0.143369	0	1198	Regional Lymph Node	L
		TCGA-EE-A2GM-06	-0.687026	-1.02724	0	861	Regional Cutaneous or Subcutaneous Tissue (includes satellite and in-transit metastasis)	L
		TCGA-EE-A2GN-06	-0.768551	-0.349202	0	1029	Regional Cutaneous or Subcutaneous Tissue (includes satellite and in-transit metastasis)	L
		TCGA-EE-A2GO-06	-1.04274	-1.25644	0	938	Regional Cutaneous or Subcutaneous Tissue (includes satellite and in-transit metastasis)	L
		TCGA-EE-A2GP-06	-0.587351	0.0564046	1	165	Regional Cutaneous or Subcutaneous Tissue (includes satellite and in-transit metastasis)	L
		TCGA-EE-A2GR-06	-1.32954	-1.02058	0	35	Regional Cutaneous or Subcutaneous Tissue (includes satellite and in-transit metastasis)	L
		TCGA-EE-A2GS-06	-0.208844	-0.0289094	0	396	Regional Cutaneous or Subcutaneous Tissue (includes satellite and in-transit metastasis)	L
		TCGA-EE-A2M5-06	-0.309187	-1.04571	1	269	Regional Lymph Node	L
		TCGA-EE-A2M6-06	-0.317334	-0.654364	0	2989	Regional Lymph Node	L
		TCGA-EE-A2MF-06	-0.0104149	-0.59003	1	83	Regional Lymph Node	L
		TCGA-EE-A2MI-06	0.733963	-0.826112	1	443	Regional Lymph Node	L
		TCGA-EE-A2MM-06	-0.728355	-0.960192	1	1704	Regional Lymph Node	L
		TCGA-EE-A2MP-06	-0.0062835	-0.871278	0	821	Regional Lymph Node	L
		TCGA-EE-A2MQ-06	-0.566488	0.212489	1	657	Regional Lymph Node	L
		TCGA-EE-A2MS-06	-0.365744	-1.13572	0	826	Regional Lymph Node	L
		TCGA-EE-A2MT-06	-0.622289	-0.522657	0	701	Regional Lymph Node	L
		TCGA-EE-A3AB-06	-0.469128	-0.860615	0	3733	Regional Lymph Node	L
		TCGA-EE-A3AD-06	-1.17963	-1.22248	0	112	Regional Lymph Node	L
		TCGA-EE-A3AG-06	-1.22704	-1.26041	0	485	Regional Cutaneous or Subcutaneous Tissue (includes satellite and in-transit metastasis)	L
		TCGA-EE-A3AH-06	-0.863244	-0.0051066	1	387	Regional Lymph Node	L
		TCGA-EE-A3J4-06	-0.202422	-0.219313	1	697	Regional Cutaneous or Subcutaneous Tissue (includes satellite and in-transit metastasis)	L
		TCGA-EE-A3J7-06	-0.646751	-0.988518	0	657	Regional Cutaneous or Subcutaneous Tissue (includes satellite and in-transit metastasis)	L
		TCGA-EE-A3J8-06	-1.10124	-1.27648	1	491	Regional Cutaneous or Subcutaneous Tissue (includes satellite and in-transit metastasis)	L
		TCGA-EE-A3JB-06	-0.386763	-0.23862	0	29	Regional Cutaneous or Subcutaneous Tissue (includes satellite and in-transit metastasis)	L
		TCGA-EE-A3JI-06	-0.925227	-0.961027	0	1022	Regional Lymph Node	L
		TCGA-ER-A196-01	-0.934047	-0.948564	0	477	Primary Tumor	L
		TCGA-ER-A197-06	0.720854	-0.722337	1	394	[Not Available]	L
		TCGA-ER-A198-06	0.07229	-0.325483	1	1168	Regional Cutaneous or Subcutaneous Tissue (includes satellite and in-transit metastasis)	L
		TCGA-ER-A19B-06	-1.15609	-1.25528	1	766	Regional Cutaneous or Subcutaneous Tissue (includes satellite and in-transit metastasis)	L
		TCGA-ER-A19C-06	-1.33882	-0.884256	1	115	Regional Lymph Node	L
		TCGA-ER-A19E-06	-1.13164	-0.768994	1	362	Regional Lymph Node	L
		TCGA-ER-A19F-06	-0.406312	-0.493113	1	338	Regional Lymph Node	L
		TCGA-ER-A19H-06	-0.41453	0.0344838	1	1061	Regional Cutaneous or Subcutaneous Tissue (includes satellite and in-transit metastasis)	L
		TCGA-ER-A19J-06	-0.915136	-0.727285	1	128	Regional Lymph Node	L
		TCGA-ER-A19K-01	-0.190934	-0.448741	1	439	Primary Tumor	L
		TCGA-ER-A19L-06	-1.20252	-0.572417	1	409	Regional Lymph Node	L
		TCGA-ER-A19Q-06	0.0784177	-0.0891815	1	291	Regional Lymph Node	L
		TCGA-ER-A19T-01	-1.33598	-1.27648	1	200	Primary Tumor	L
		TCGA-ER-A19T-06	-0.131054	-1.03246	1	200	Primary Tumor	L
		TCGA-ER-A2NC-06	-0.797498	-1.21775	1	359	Distant Metastasis	L
		TCGA-ER-A2ND-06	-0.34783	-0.922585	1	57	Distant Metastasis	L
		TCGA-ER-A2NE-06	-1.29081	-1.18788	1	46	Distant Metastasis	L
		TCGA-ER-A3ES-06	-1.33552	-1.27648	1	275	Distant Metastasis	L
		TCGA-ER-A3EV-06	0.0339047	-0.790975	1	684	Distant Metastasis	L
		TCGA-ER-A3PL-06	-0.58749	-1.18042	0	52	Regional Cutaneous or Subcutaneous Tissue (includes satellite and in-transit metastasis)	L
		TCGA-ER-A42H-01	-1.31258	-1.10572	1	312	Primary Tumor	L
		TCGA-ER-A42K-06	-1.13326	0.279278	0	171	Regional Lymph Node	L
		TCGA-FR-A2OS-01	-1.31884	-1.20214	1	368	Primary Tumor	L
		TCGA-FR-A3R1-01	0.596981	-0.731528	0	307	Primary Tumor	L
		TCGA-FR-A3YO-06	-1.28981	-1.15957	0	0	Distant Metastasis	L
		TCGA-FR-A69P-06	-0.895922	-0.698887	0	149	Regional Lymph Node	L
		TCGA-FR-A726-01	-0.890747	-1.22272	0	232	Primary Tumor	L
		TCGA-FR-A728-01	0.680572	-0.963445	0	231	Primary Tumor	L
		TCGA-FR-A7U8-06	-1.15799	-1.24528	0	109	Distant Metastasis	L
		TCGA-FR-A8YC-06	-0.259599	-1.27648	1	67	Distant Metastasis	L
		TCGA-FR-A8YD-06	-0.855389	0.175156	0	143	Distant Metastasis	L
		TCGA-FS-A1YW-06	-0.699879	0.479234	1	1961	Regional Lymph Node	L
		TCGA-FS-A1YX-06	-1.0927	-0.707844	1	105	Regional Cutaneous or Subcutaneous Tissue (includes satellite and in-transit metastasis)	L
		TCGA-FS-A1YY-06	-1.34992	-0.474816	1	335	Distant Metastasis	L
		TCGA-FS-A1Z3-06	-1.27748	-0.317345	1	433	Distant Metastasis	L
		TCGA-FS-A1Z7-06	-1.12666	-0.0734436	1	223	Regional Lymph Node	L
		TCGA-FS-A1ZC-06	-1.2353	-1.25915	1	620	Distant Metastasis	L
		TCGA-FS-A1ZD-06	-1.33208	-1.15614	1	250	Regional Lymph Node	L
		TCGA-FS-A1ZE-06	-1.11282	-0.295014	0	594	Distant Metastasis	L
		TCGA-FS-A1ZF-06	-0.920237	-0.799126	1	337	Distant Metastasis	L
		TCGA-FS-A1ZG-06	-1.20918	-0.710013	1	218	Regional Lymph Node	L
		TCGA-FS-A1ZJ-06	-0.95165	-0.418395	1	393	Regional Lymph Node	L
		TCGA-FS-A1ZK-06	-1.29706	-0.868975	1	392	Distant Metastasis	L
		TCGA-FS-A1ZN-01	-1.22496	-1.25132	1	730	Primary Tumor	L
		TCGA-FS-A1ZQ-06	-1.07392	0.505329	1	263	Distant Metastasis	L
		TCGA-FS-A1ZR-06	-0.738234	0.209207	1	268	Regional Cutaneous or Subcutaneous Tissue (includes satellite and in-transit metastasis)	L
		TCGA-FS-A1ZS-06	-0.945782	-0.548006	0	1495	Regional Lymph Node	L
		TCGA-FS-A1ZU-06	-1.20897	-1.21032	1	264	Distant Metastasis	L
		TCGA-FS-A1ZY-06	-1.24607	-1.27648	1	25	Distant Metastasis	L
		TCGA-FS-A1ZZ-06	-0.750179	-0.855242	1	159	Distant Metastasis	L
		TCGA-FS-A4F0-06	-1.30998	-0.869635	0	1638	Regional Cutaneous or Subcutaneous Tissue (includes satellite and in-transit metastasis)	L
		TCGA-FS-A4F2-06	-1.19301	-0.521377	1	98	Regional Cutaneous or Subcutaneous Tissue (includes satellite and in-transit metastasis)	L
		TCGA-FS-A4F5-06	-0.757641	-0.470575	1	874	Regional Cutaneous or Subcutaneous Tissue (includes satellite and in-transit metastasis)	L
		TCGA-FS-A4F9-06	-1.18329	-0.663907	0	328	Regional Lymph Node	L
		TCGA-FS-A4FB-06	-1.01004	-0.98193	1	182	Regional Lymph Node	L
		TCGA-FS-A4FC-06	-0.444866	0.426556	0	195	Regional Cutaneous or Subcutaneous Tissue (includes satellite and in-transit metastasis)	L
		TCGA-FS-A4FD-06	-0.157608	-0.585149	0	69	Regional Lymph Node	L
		TCGA-FW-A3I3-06	-0.397128	-1.24086	0	6	Distant Metastasis	L
		TCGA-FW-A3TU-06	-1.06471	-0.172684	0	4	Distant Metastasis	L
		TCGA-FW-A5DX-01	-1.09943	-0.650953	0	48	Primary Tumor	L
		TCGA-GF-A3OT-06	0.128392	-0.839105	0	301	Regional Lymph Node	L
		TCGA-GF-A769-01	-0.994427	-1.27648	1	1070	Primary Tumor	L
		TCGA-GN-A262-06	-1.35454	-1.26626	0	756	Regional Cutaneous or Subcutaneous Tissue (includes satellite and in-transit metastasis)	L
		TCGA-GN-A264-06	-1.22142	-1.11015	1	953	Regional Lymph Node	L
		TCGA-GN-A268-06	-1.11137	-1.18081	1	469	Regional Lymph Node	L
		TCGA-GN-A26A-06	0.567897	-1.10834	1	370	Regional Cutaneous or Subcutaneous Tissue (includes satellite and in-transit metastasis)	L
		TCGA-GN-A26D-06	-0.71	-0.185076	0	447	Regional Lymph Node	L
		TCGA-GN-A4U3-06	-0.903557	-1.10715	0	1058	Distant Metastasis	L
		TCGA-GN-A4U4-06	-0.329565	0.377121	0	742	Regional Lymph Node	L
		TCGA-GN-A4U7-06	-1.14368	-0.0885023	0	118	Regional Lymph Node	L
		TCGA-GN-A4U9-06	0.0426365	-0.721351	0	324	Regional Lymph Node	L
		TCGA-GN-A8LK-06	-1.13208	-1.21223	1	441	Distant Metastasis	L
		TCGA-GN-A8LL-06	-0.715223	-1.17486	1	441	Regional Lymph Node	L
		TCGA-GN-A8LN-01	-0.388404	-0.212377	0	396	Primary Tumor	L
		TCGA-HR-A5NC-01	-1.27104	-1.06033	0	1000	Primary Tumor	L
		TCGA-IH-A3EA-01	-0.81594	-1.06459	0	383	Primary Tumor	L
		TCGA-LH-A9QB-06	-1.28646	-0.560428	0	13	Distant Metastasis	L
		TCGA-OD-A75X-06	-0.447078	-1.01819	0	336	Distant Metastasis	L
		TCGA-RP-A690-06	-1.09723	-1.08968	0	6	Distant Metastasis	L
		TCGA-RP-A693-06	0.226986	-0.94115	0	10	Distant Metastasis	L
		TCGA-RP-A694-06	1.03881	-1.21163	0	21	Distant Metastasis	L
		TCGA-RP-A695-06	-0.0129102	-0.537481	0	12	Distant Metastasis	L
		TCGA-RP-A6K9-06	-0.368856	-0.823076	0	821	Distant Metastasis	L
		TCGA-W3-A828-06	-0.504637	-0.618869	1	1826	Distant Metastasis	L
		TCGA-W3-AA1O-06	-1.1049	-0.684747	1	91	Regional Lymph Node	L
		TCGA-W3-AA1R-06	0.380994	-0.611912	1	2618	Regional Lymph Node	L
		TCGA-W3-AA1V-06	-0.752644	-1.21368	1	334	Regional Lymph Node	L
		TCGA-W3-AA21-06	0.066186	0.0914507	1	2160	Regional Lymph Node	L
		TCGA-WE-A8JZ-06	-0.511705	-0.0556827	0	360	Regional Lymph Node	L
		TCGA-WE-A8K5-06	0.045922	-0.0999872	0	197	Regional Cutaneous or Subcutaneous Tissue (includes satellite and in-transit metastasis)	L
		TCGA-WE-A8K6-06	-1.08366	-0.925075	0	216	Regional Lymph Node	L
		TCGA-WE-A8ZM-06	-1.36759	-0.943498	0	568	Regional Cutaneous or Subcutaneous Tissue (includes satellite and in-transit metastasis)	L
		TCGA-WE-A8ZO-06	0.280706	-1.05547	0	399	Regional Lymph Node	L
		TCGA-WE-A8ZQ-06	-1.33017	-0.956644	0	113	Regional Lymph Node	L
		TCGA-WE-A8ZR-06	-0.0493198	-0.00527995	0	109	Regional Lymph Node	L
		TCGA-WE-A8ZT-06	-0.771711	0.0185815	0	104	Regional Lymph Node	L
		TCGA-WE-A8ZY-06	-0.606312	-0.174002	0	163	Regional Cutaneous or Subcutaneous Tissue (includes satellite and in-transit metastasis)	L
		TCGA-WE-AAA3-06	-0.209736	0.0394701	0	59	Regional Lymph Node	L
		TCGA-XV-A9VZ-01	-1.30661	0.593165	0	9	Primary Tumor	L
		TCGA-XV-A9W2-01	-0.862434	-0.279802	0	12	Primary Tumor	L
		TCGA-XV-A9W5-01	-0.294574	-0.901381	0	15	Primary Tumor	L
		TCGA-XV-AAZV-01	0.625113	-0.925073	0	17	Primary Tumor	L
		TCGA-XV-AAZW-01	-1.16715	-0.412445	0	18	Primary Tumor	L
		TCGA-YD-A89C-06	-0.87784	-1.18405	0	8	Distant Metastasis	L
		TCGA-YD-A9TB-06	-0.755528	-0.742759	0	201	Distant Metastasis	L
		TCGA-YG-AA3O-06	-0.189155	-0.0858672	0	188	Regional Lymph Node	L
		TCGA-YG-AA3P-06	-1.18713	-1.18647	0	143	Distant Metastasis	L
		TCGA-Z2-AA3S-06	-0.315537	-0.453237	0	203	Regional Lymph Node	L

## Sheet: S4b_SKCM TCGA_Cox regresson
Table S4b
Melenoma TCGA
Cox Regression Analysis (CCL19/CXCL13 high vs. low)
	coef	exp(coef)	se(coef)	z-score	Pr(>|z|)
rank (CCL19/CXCL13 high)	-0.523426	0.592487	0.1838	-2.8478	0.00440232
metastaticDistant Metastasis	0.477427	1.61192	0.401569	1.1889	0.234477
metastaticRegional Lymph Node	-0.0450453	0.955954	0.385987	-0.116702	0.907097
metastaticRegional Cutaneous or Subcutaneous Tissue (includes satellite and in-transit metastasis)	-0.510088	0.600443	0.432445	-1.17954	0.238182
genderFEMALE	0.164899	1.17927	0.190461	0.865789	0.386606
raceBLACK OR AFRICAN AMERICAN	-1.26041	0.283536	1.16531	-1.08161	0.279425
raceASIAN	1.45136	4.26892	1.04385	1.39039	0.16441
age_at_diagnosis	0.0198058	1.02	0.00589671	3.3588	0.000782827
ajcc_pathologic_tumor_stageStage I	-1.01749	0.3615	0.553224	-1.83921	0.0658848
ajcc_pathologic_tumor_stageStage II	-1.3142	0.268689	0.554937	-2.3682	0.0178751
ajcc_pathologic_tumor_stageStage III	-1.05986	0.346503	0.543695	-1.94937	0.0512512
ajcc_pathologic_tumor_stageStage IV	-0.720805	0.48636	0.650588	-1.10793	0.267892
ajcc_pathologic_tumor_stageI or II NOS	-1.11521	0.327847	0.664434	-1.67843	0.0932624
coef = regression coefficient
exp(coef) = exponentiated coefficients (hazard rates)
se(coef) = confidence intervals of the hazard rates
Positive coefficient means positively correlated with hazard rates (high CCL19/CXCL13 expression will have low survival rate)
negative coefficient means negatively correlated with hazard rates (high CCL19/CXCL13 expression level will have high survival rate)
Pr(>|z|) is p-value

## Sheet: S4c_SKCM TCGA_4way
Table S4c
Melenoma TCGA					Log2 Transformed and Scaled Data from RPKM (Reads Per Kilobase of transcript per Million mapped reads)
4-way sort
Row.names	CXCL13	CCL19	status	time	metastatic	rank
TCGA-3N-A9WC-06	1.61037	1.26205	0	212	Regional Lymph Node	HH
TCGA-3N-A9WD-06	0.983587	1.81441	1	212	Regional Lymph Node	HH
TCGA-BF-A1PX-01	0.852603	0.768226	1	282	Primary Tumor	HH
TCGA-BF-A1Q0-01	0.344372	0.500314	0	17	Primary Tumor	HH
TCGA-BF-A5EQ-01	0.745411	0.925878	0	12	Primary Tumor	HH
TCGA-BF-A5ES-01	-0.066073	0.0676988	0	19	Primary Tumor	HH
TCGA-BF-AAP0-06	1.69742	1.9384	0	14	Regional Lymph Node	HH
TCGA-BF-AAP4-01	0.707322	0.155726	0	15	Primary Tumor	HH
TCGA-BF-AAP7-01	0.561182	-0.0806982	0	15	Primary Tumor	HH
TCGA-D3-A1Q3-06	0.700588	1.58804	1	259	Regional Lymph Node	HH
TCGA-D3-A1Q7-06	0.678545	0.831003	0	3004	Regional Lymph Node	HH
TCGA-D3-A1Q9-06	0.742404	-0.143687	1	686	Regional Lymph Node	HH
TCGA-D3-A1QA-07	-0.0653138	0.0944818	0	955	Regional Lymph Node	HH
TCGA-D3-A1QB-06	1.57763	0.732469	0	2071	Regional Lymph Node	HH
TCGA-D3-A2J7-06	0.61093	0.378294	1	2595	Regional Lymph Node	HH
TCGA-D3-A2J8-06	0.628328	1.91403	1	255	Regional Lymph Node	HH
TCGA-D3-A2J9-06	1.63484	2.2729	1	643	Regional Lymph Node	HH
TCGA-D3-A2JB-06	1.48559	2.06797	1	2075	Regional Lymph Node	HH
TCGA-D3-A2JC-06	0.0933035	-0.0808447	0	2126	Regional Lymph Node	HH
TCGA-D3-A2JD-06	0.861293	1.78648	1	347	Regional Lymph Node	HH
TCGA-D3-A2JF-06	0.53546	1.42909	0	939	Distant Metastasis	HH
TCGA-D3-A2JH-06	1.47569	0.174415	0	772	Regional Cutaneous or Subcutaneous Tissue (includes satellite and in-transit metastasis)	HH
TCGA-D3-A2JL-06	1.25783	1.41894	0	2349	Regional Lymph Node	HH
TCGA-D3-A2JN-06	0.960325	1.25638	0	1709	Regional Lymph Node	HH
TCGA-D3-A2JO-06	1.29654	0.0240497	0	1498	Regional Cutaneous or Subcutaneous Tissue (includes satellite and in-transit metastasis)	HH
TCGA-D3-A2JP-06	0.982799	0.966919	0	1372	Regional Lymph Node	HH
TCGA-D3-A3BZ-06	0.955923	2.02676	0	3028	Regional Lymph Node	HH
TCGA-D3-A3C3-06	-0.0973995	1.23635	0	-5	Regional Lymph Node	HH
TCGA-D3-A3C7-06	1.10505	0.0120245	0	1007	Regional Lymph Node	HH
TCGA-D3-A3C8-06	2.85839	0.972488	0	1038	Regional Cutaneous or Subcutaneous Tissue (includes satellite and in-transit metastasis)	HH
TCGA-D3-A3CB-06	0.998895	1.5253	0	1949	Regional Lymph Node	HH
TCGA-D3-A3CE-06	0.169551	0.525088	1	405	Regional Lymph Node	HH
TCGA-D3-A3CF-06	1.16324	1.93645	1	730	Regional Lymph Node	HH
TCGA-D3-A3MR-06	1.15846	1.89261	0	2724	Regional Cutaneous or Subcutaneous Tissue (includes satellite and in-transit metastasis)	HH
TCGA-D3-A3MU-06	-0.0230933	0.874463	0	412	Regional Lymph Node	HH
TCGA-D3-A51F-06	2.34357	0.629856	0	1299	Regional Lymph Node	HH
TCGA-D3-A51H-06	2.60882	2.02973	0	459	Regional Lymph Node	HH
TCGA-D3-A51J-06	1.06046	1.08982	0	1250	Regional Cutaneous or Subcutaneous Tissue (includes satellite and in-transit metastasis)	HH
TCGA-D3-A51T-06	0.716269	0.204625	0	424	Regional Lymph Node	HH
TCGA-D3-A5GN-06	0.834636	-0.0952913	0	1582	Regional Lymph Node	HH
TCGA-D3-A5GR-06	0.744761	2.04957	0	47	Regional Lymph Node	HH
TCGA-D3-A8GB-06	1.27221	1.29488	1	904	Regional Lymph Node	HH
TCGA-D3-A8GD-06	1.66709	1.49204	0	311	Regional Lymph Node	HH
TCGA-D3-A8GJ-06	1.42899	0.0433594	0	4333	Distant Metastasis	HH
TCGA-D3-A8GM-06	0.382228	1.17111	0	2301	Regional Lymph Node	HH
TCGA-D3-A8GO-06	1.82001	1.97894	1	1022	Regional Lymph Node	HH
TCGA-D3-A8GS-06	-0.114034	0.670567	1	732	Distant Metastasis	HH
TCGA-D9-A3Z3-06	1.10341	1.38224	0	88	Regional Lymph Node	HH
TCGA-D9-A3Z4-01	-0.00365626	0.276038	0	119	Primary Tumor	HH
TCGA-D9-A6E9-06	1.88578	1.23858	0	-5	Primary Tumor	HH
TCGA-DA-A1HV-06	1.02676	0.762842	0	23	Regional Lymph Node	HH
TCGA-DA-A1HW-06	0.648019	1.07833	0	52	Regional Lymph Node	HH
TCGA-DA-A1I1-06	0.55971	0.659335	0	96	Regional Cutaneous or Subcutaneous Tissue (includes satellite and in-transit metastasis)	HH
TCGA-DA-A1I2-06	0.287778	0.420215	1	40	Regional Lymph Node	HH
TCGA-DA-A1I5-06	0.705896	1.681	0	988	Distant Metastasis	HH
TCGA-DA-A1IB-06	1.93637	2.71993	0	40	Regional Lymph Node	HH
TCGA-DA-A3F2-06	0.781579	0.306082	0	6	Regional Cutaneous or Subcutaneous Tissue (includes satellite and in-transit metastasis)	HH
TCGA-DA-A3F8-06	1.73708	1.0321	0	451	Regional Lymph Node	HH
TCGA-DA-A95V-06	0.0793719	1.48017	0	34	Regional Lymph Node	HH
TCGA-EB-A299-01	-0.0461295	0.410305	0	0	Primary Tumor	HH
TCGA-EB-A3XC-01	0.550187	-0.0276367	0	9	Primary Tumor	HH
TCGA-EB-A3Y6-01	0.0525787	0.0190844	0	16	Primary Tumor	HH
TCGA-EB-A44N-01	0.510017	1.14724	0	45	Primary Tumor	HH
TCGA-EB-A44Q-06	0.458211	0.839215	0	6	Regional Lymph Node	HH
TCGA-EB-A4IS-01	1.48017	1.23557	0	0	Primary Tumor	HH
TCGA-EB-A4OZ-01	0.572056	0.85336	0	-3	Primary Tumor	HH
TCGA-EB-A4XL-01	0.278663	0.644236	0	0	Primary Tumor	HH
TCGA-EB-A551-01	1.45475	0.0828307	0	8	Primary Tumor	HH
TCGA-EB-A57M-01	-0.0991198	0.614124	0	8	Primary Tumor	HH
TCGA-EB-A5SG-06	1.98611	1.20821	0	0	Regional Lymph Node	HH
TCGA-EB-A5UL-06	0.950841	0.884597	0	-12	Regional Lymph Node	HH
TCGA-EB-A5UM-01	0.509465	0.976763	0	0	Primary Tumor	HH
TCGA-EB-A5VV-06	2.7655	2.65372	0	-5	Regional Lymph Node	HH
TCGA-EB-A6L9-06	0.93093	2.63305	0	6	Regional Lymph Node	HH
TCGA-EB-A82B-01	0.61149	0.60647	0	4	Primary Tumor	HH
TCGA-EB-A85J-01	1.17231	-0.0522062	0	-6	Primary Tumor	HH
TCGA-EE-A181-06	0.903877	1.14277	1	34	Regional Lymph Node	HH
TCGA-EE-A183-06	0.538196	2.13328	1	371	Regional Lymph Node	HH
TCGA-EE-A184-06	0.575765	0.0216103	1	156	Distant Metastasis	HH
TCGA-EE-A20B-06	0.0524581	0.00896969	0	1097	Regional Cutaneous or Subcutaneous Tissue (includes satellite and in-transit metastasis)	HH
TCGA-EE-A20F-06	0.332729	0.872689	0	96	Regional Lymph Node	HH
TCGA-EE-A20I-06	0.323868	0.112446	1	36	Regional Cutaneous or Subcutaneous Tissue (includes satellite and in-transit metastasis)	HH
TCGA-EE-A29H-06	0.162286	1.12034	0	134	Regional Lymph Node	HH
TCGA-EE-A29M-06	0.300402	0.968388	0	825	Regional Lymph Node	HH
TCGA-EE-A29N-06	1.51651	1.61102	1	289	Regional Lymph Node	HH
TCGA-EE-A29P-06	1.44094	0.499222	0	366	Regional Lymph Node	HH
TCGA-EE-A2A0-06	0.890538	0.355483	1	344	Regional Lymph Node	HH
TCGA-EE-A2A1-06	0.925182	1.82905	0	769	Regional Lymph Node	HH
TCGA-EE-A2A2-06	0.346621	0.846212	0	727	Regional Lymph Node	HH
TCGA-EE-A2A6-06	1.21552	0.852367	0	272	Regional Lymph Node	HH
TCGA-EE-A2GE-06	1.10018	0.324236	0	1062	Regional Lymph Node	HH
TCGA-EE-A2GH-06	1.60417	0.30953	0	644	Regional Lymph Node	HH
TCGA-EE-A2GI-06	1.31856	0.561726	0	119	Regional Lymph Node	HH
TCGA-EE-A2GJ-06	1.08997	-0.00088465	0	591	Regional Lymph Node	HH
TCGA-EE-A2GK-06	2.91285	2.47168	0	487	Regional Lymph Node	HH
TCGA-EE-A2GL-06	1.5455	1.93609	0	331	Regional Lymph Node	HH
TCGA-EE-A2GT-06	0.509693	1.99422	0	294	Regional Lymph Node	HH
TCGA-EE-A2M7-06	0.493035	0.639806	1	82	Regional Lymph Node	HH
TCGA-EE-A2M8-06	1.59991	0.491447	1	188	Regional Lymph Node	HH
TCGA-EE-A2MC-06	0.729807	0.262835	1	1445	Regional Lymph Node	HH
TCGA-EE-A2MD-06	0.446234	0.594592	1	290	Regional Lymph Node	HH
TCGA-EE-A2ME-06	1.69588	2.11501	1	896	Regional Lymph Node	HH
TCGA-EE-A2MG-06	1.48988	2.1381	1	1346	Regional Lymph Node	HH
TCGA-EE-A2MH-06	0.666982	1.71355	1	242	Regional Lymph Node	HH
TCGA-EE-A2MJ-06	1.53023	1.78938	1	1929	Regional Lymph Node	HH
TCGA-EE-A2MN-06	0.615947	0.347124	1	763	Regional Lymph Node	HH
TCGA-EE-A2MR-06	1.38638	1.85114	0	902	Regional Lymph Node	HH
TCGA-EE-A2MU-06	1.01356	0.193165	0	169	Regional Cutaneous or Subcutaneous Tissue (includes satellite and in-transit metastasis)	HH
TCGA-EE-A3AA-06	1.2209	1.89114	0	3781	Regional Lymph Node	HH
TCGA-EE-A3AC-06	0.769073	0.116822	0	786	Regional Lymph Node	HH
TCGA-EE-A3AE-06	2.7615	0.0644253	0	72	Regional Lymph Node	HH
TCGA-EE-A3AF-06	0.163987	0.232948	1	420	Regional Lymph Node	HH
TCGA-EE-A3J3-06	-0.0219615	0.617617	1	98	Regional Cutaneous or Subcutaneous Tissue (includes satellite and in-transit metastasis)	HH
TCGA-EE-A3J5-06	1.04808	0.659648	1	657	Regional Cutaneous or Subcutaneous Tissue (includes satellite and in-transit metastasis)	HH
TCGA-EE-A3JA-06	0.640905	-0.00849407	1	676	Regional Lymph Node	HH
TCGA-EE-A3JD-06	2.13896	1.98612	1	832	Regional Lymph Node	HH
TCGA-EE-A3JE-06	1.92378	0.621678	0	14	Regional Cutaneous or Subcutaneous Tissue (includes satellite and in-transit metastasis)	HH
TCGA-EE-A3JH-06	0.975972	1.99629	0	424	Regional Lymph Node	HH
TCGA-ER-A193-06	1.09209	0.841408	1	955	Regional Lymph Node	HH
TCGA-ER-A194-01	0.184266	0.99165	1	1276	Primary Tumor	HH
TCGA-ER-A195-06	0.0346133	0.636826	1	566	Regional Lymph Node	HH
TCGA-ER-A199-06	1.15284	1.22341	1	174	Regional Lymph Node	HH
TCGA-ER-A19A-06	1.82814	0.714151	0	2324	Regional Cutaneous or Subcutaneous Tissue (includes satellite and in-transit metastasis)	HH
TCGA-ER-A19D-06	0.391875	0.230666	1	107	Regional Cutaneous or Subcutaneous Tissue (includes satellite and in-transit metastasis)	HH
TCGA-ER-A19G-06	-0.115983	0.610275	0	3472	Regional Lymph Node	HH
TCGA-ER-A19N-06	1.1963	1.31738	0	1303	Regional Lymph Node	HH
TCGA-ER-A19P-06	1.13176	1.74818	1	1055	Regional Lymph Node	HH
TCGA-ER-A19Q-06	0.0784177	-0.0891815	1	291	Regional Lymph Node	HH
TCGA-ER-A19S-06	1.30816	0.756377	0	1097	Regional Lymph Node	HH
TCGA-ER-A19W-06	1.78779	0.855761	1	539	Regional Cutaneous or Subcutaneous Tissue (includes satellite and in-transit metastasis)	HH
TCGA-ER-A1A1-06	1.91811	1.2253	0	2386	Regional Lymph Node	HH
TCGA-ER-A2NF-01	0.878915	0.578043	0	398	Primary Tumor	HH
TCGA-ER-A2NH-06	1.80032	0.793362	0	357	Regional Lymph Node	HH
TCGA-ER-A3ET-06	0.292329	-0.0471002	0	200	Regional Cutaneous or Subcutaneous Tissue (includes satellite and in-transit metastasis)	HH
TCGA-FR-A3YN-06	0.574249	-0.0506485	0	181	Regional Lymph Node	HH
TCGA-FR-A44A-06	0.984128	0.746268	0	2195	Regional Lymph Node	HH
TCGA-FR-A729-06	1.04353	1.19066	0	204	Regional Lymph Node	HH
TCGA-FR-A7U9-06	0.478098	0.533924	0	163	Regional Lymph Node	HH
TCGA-FR-A7UA-06	1.84917	0.753518	0	41	Regional Lymph Node	HH
TCGA-FR-A8YE-06	0.587684	1.82572	0	100	Regional Lymph Node	HH
TCGA-FS-A1Z4-06	1.19903	1.95504	1	472	Regional Lymph Node	HH
TCGA-FS-A1ZA-06	0.247952	0.244553	1	222	Distant Metastasis	HH
TCGA-FS-A1ZH-06	0.86572	1.01775	1	939	Regional Lymph Node	HH
TCGA-FS-A1ZP-06	0.255789	0.724069	1	1584	Regional Lymph Node	HH
TCGA-FS-A1ZT-06	0.166378	0.5494	0	1236	Distant Metastasis	HH
TCGA-FS-A1ZW-06	0.807595	0.0851751	0	833	Regional Lymph Node	HH
TCGA-FS-A4F4-06	-0.0978089	0.353557	1	224	Regional Cutaneous or Subcutaneous Tissue (includes satellite and in-transit metastasis)	HH
TCGA-FS-A4F8-06	0.971491	2.32306	1	432	Regional Lymph Node	HH
TCGA-FW-A3R5-06	0.850553	1.06892	0	30	Regional Lymph Node	HH
TCGA-FW-A3TV-06	0.347514	0.372967	0	5	Regional Lymph Node	HH
TCGA-FW-A5DY-06	2.03277	1.85991	0	13	Regional Lymph Node	HH
TCGA-GF-A4EO-06	0.648045	1.65345	0	220	Regional Lymph Node	HH
TCGA-GF-A6C8-06	-0.0905187	0.7056	0	26	Regional Lymph Node	HH
TCGA-GF-A6C9-06	1.81201	1.53723	0	353	Distant Metastasis	HH
TCGA-GN-A265-06	1.43381	1.4843	0	2577	Regional Lymph Node	HH
TCGA-GN-A266-06	0.980075	0.132039	1	308	Regional Cutaneous or Subcutaneous Tissue (includes satellite and in-transit metastasis)	HH
TCGA-GN-A26C-01	1.83549	1.63581	1	730	Primary Tumor	HH
TCGA-GN-A4U5-01	1.40617	0.246004	0	707	Primary Tumor	HH
TCGA-GN-A4U8-06	1.02083	1.35068	0	360	Regional Lymph Node	HH
TCGA-GN-A9SD-06	1.37901	1.84812	1	441	Regional Lymph Node	HH
TCGA-HR-A2OG-06	0.0479162	0.402303	0	7	Distant Metastasis	HH
TCGA-HR-A2OH-06	1.55914	0.770006	1	481	Distant Metastasis	HH
TCGA-QB-A6FS-06	0.717813	2.02133	0	176	Regional Lymph Node	HH
TCGA-QB-AA9O-06	1.24137	-0.0234356	1	549	Regional Lymph Node	HH
TCGA-W3-AA1Q-06	0.12483	0.586267	1	1219	Distant Metastasis	HH
TCGA-W3-AA1W-06	1.66627	1.52121	0	5267	Distant Metastasis	HH
TCGA-W3-AA21-06	0.066186	0.0914507	1	2160	Regional Lymph Node	HH
TCGA-WE-A8K1-06	1.11775	0.655385	0	167	Regional Cutaneous or Subcutaneous Tissue (includes satellite and in-transit metastasis)	HH
TCGA-WE-A8K5-06	0.045922	-0.0999872	0	197	Regional Cutaneous or Subcutaneous Tissue (includes satellite and in-transit metastasis)	HH
TCGA-WE-A8ZN-06	0.0865895	1.01964	0	371	Regional Cutaneous or Subcutaneous Tissue (includes satellite and in-transit metastasis)	HH
TCGA-WE-A8ZR-06	-0.0493198	-0.00527995	0	109	Regional Lymph Node	HH
TCGA-WE-A8ZX-06	0.948585	0.377066	0	664	Regional Lymph Node	HH
TCGA-WE-AA9Y-06	0.966148	1.3	0	33	Regional Lymph Node	HH
TCGA-WE-AAA0-06	1.03353	1.02573	0	607	Regional Lymph Node	HH
TCGA-WE-AAA4-06	0.975117	0.198904	0	367	Regional Cutaneous or Subcutaneous Tissue (includes satellite and in-transit metastasis)	HH
TCGA-YD-A9TA-06	0.618844	0.054035	0	570	Distant Metastasis	HH
TCGA-Z2-A8RT-06	0.146693	0.738115	0	250	Regional Cutaneous or Subcutaneous Tissue (includes satellite and in-transit metastasis)	HH
TCGA-Z2-AA3V-06	-0.0267447	2.33113	0	182	Regional Lymph Node	HH
TCGA-BF-AAOU-01	1.28355	-0.993345	0	13	Primary Tumor	HL
TCGA-D3-A1Q6-06	0.103625	-1.20395	1	2134	Regional Cutaneous or Subcutaneous Tissue (includes satellite and in-transit metastasis)	HL
TCGA-D3-A2J6-06	0.367918	-1.25203	1	313	Regional Lymph Node	HL
TCGA-D3-A2JA-06	0.887268	-1.01793	0	2282	Regional Cutaneous or Subcutaneous Tissue (includes satellite and in-transit metastasis)	HL
TCGA-D3-A51E-06	0.855961	-0.580247	0	2440	Regional Cutaneous or Subcutaneous Tissue (includes satellite and in-transit metastasis)	HL
TCGA-D3-A51G-06	0.261706	-1.26713	0	5267	Regional Cutaneous or Subcutaneous Tissue (includes satellite and in-transit metastasis)	HL
TCGA-D3-A51K-06	1.00472	-0.745655	0	539	Regional Lymph Node	HL
TCGA-D3-A5GO-06	0.394022	-0.337137	0	1456	Distant Metastasis	HL
TCGA-D3-A5GS-06	0.341178	-0.483302	0	212	Regional Lymph Node	HL
TCGA-D3-A5GU-06	-0.116731	-0.217588	0	703	Regional Lymph Node	HL
TCGA-D3-A8GE-06	1.04996	-0.574362	0	462	Regional Cutaneous or Subcutaneous Tissue (includes satellite and in-transit metastasis)	HL
TCGA-D3-A8GN-06	0.922672	-0.406654	0	3418	Distant Metastasis	HL
TCGA-D9-A3Z1-06	1.09013	-0.251174	0	122	Regional Lymph Node	HL
TCGA-DA-A1I7-06	0.17164	-1.11173	0	750	Regional Cutaneous or Subcutaneous Tissue (includes satellite and in-transit metastasis)	HL
TCGA-EB-A3XB-01	-0.0854129	-1.0058	0	36	Primary Tumor	HL
TCGA-EB-A430-01	0.433629	-0.228287	0	-2	Primary Tumor	HL
TCGA-EB-A44R-06	0.0372299	-0.494679	0	6	Regional Lymph Node	HL
TCGA-EB-A6R0-01	0.969615	-0.825703	0	-2	Primary Tumor	HL
TCGA-EB-A85I-01	0.891738	-0.673894	0	-5	Primary Tumor	HL
TCGA-EE-A17Y-06	-0.0584102	-1.27648	1	321	Regional Cutaneous or Subcutaneous Tissue (includes satellite and in-transit metastasis)	HL
TCGA-EE-A29T-06	0.514808	-0.561858	0	197	Regional Lymph Node	HL
TCGA-EE-A2GC-06	2.00676	-0.622518	0	308	Regional Lymph Node	HL
TCGA-EE-A2GD-06	1.80023	-0.843103	0	547	Regional Cutaneous or Subcutaneous Tissue (includes satellite and in-transit metastasis)	HL
TCGA-EE-A2GU-06	0.94122	-0.339424	0	264	Regional Lymph Node	HL
TCGA-EE-A2MF-06	-0.0104149	-0.59003	1	83	Regional Lymph Node	HL
TCGA-EE-A2MI-06	0.733963	-0.826112	1	443	Regional Lymph Node	HL
TCGA-EE-A2MK-06	0.406815	-0.223918	0	3400	Regional Lymph Node	HL
TCGA-EE-A2MP-06	-0.0062835	-0.871278	0	821	Regional Lymph Node	HL
TCGA-ER-A197-06	0.720854	-0.722337	1	394	[Not Available]	HL
TCGA-ER-A198-06	0.07229	-0.325483	1	1168	Regional Cutaneous or Subcutaneous Tissue (includes satellite and in-transit metastasis)	HL
TCGA-ER-A19M-06	1.11361	-0.396342	1	870	Regional Lymph Node	HL
TCGA-ER-A2NF-06	1.04533	-0.533667	0	398	Primary Tumor	HL
TCGA-ER-A2NG-06	1.3115	-0.322726	0	384	Regional Lymph Node	HL
TCGA-ER-A3EV-06	0.0339047	-0.790975	1	684	Distant Metastasis	HL
TCGA-ER-A42L-06	0.56049	-0.205964	0	423	Distant Metastasis	HL
TCGA-FR-A3R1-01	0.596981	-0.731528	0	307	Primary Tumor	HL
TCGA-FR-A728-01	0.680572	-0.963445	0	231	Primary Tumor	HL
TCGA-FS-A1Z0-06	0.646275	-0.149403	1	724	Distant Metastasis	HL
TCGA-FS-A1ZM-06	1.05133	-0.486999	0	1441	Regional Cutaneous or Subcutaneous Tissue (includes satellite and in-transit metastasis)	HL
TCGA-GF-A3OT-06	0.128392	-0.839105	0	301	Regional Lymph Node	HL
TCGA-GN-A263-01	0.999333	-0.183118	1	467	Primary Tumor	HL
TCGA-GN-A267-06	0.98017	-0.406162	1	494	Regional Lymph Node	HL
TCGA-GN-A26A-06	0.567897	-1.10834	1	370	Regional Cutaneous or Subcutaneous Tissue (includes satellite and in-transit metastasis)	HL
TCGA-GN-A4U9-06	0.0426365	-0.721351	0	324	Regional Lymph Node	HL
TCGA-RP-A693-06	0.226986	-0.94115	0	10	Distant Metastasis	HL
TCGA-RP-A694-06	1.03881	-1.21163	0	21	Distant Metastasis	HL
TCGA-RP-A695-06	-0.0129102	-0.537481	0	12	Distant Metastasis	HL
TCGA-W3-A824-06	0.808101	-0.253275	0	4994	Regional Lymph Node	HL
TCGA-W3-A825-06	0.755754	-0.236604	1	273	Distant Metastasis	HL
TCGA-W3-AA1R-06	0.380994	-0.611912	1	2618	Regional Lymph Node	HL
TCGA-WE-A8K4-01	1.67021	-0.763038	0	306	Primary Tumor	HL
TCGA-WE-A8ZO-06	0.280706	-1.05547	0	399	Regional Lymph Node	HL
TCGA-XV-AAZV-01	0.625113	-0.925073	0	17	Primary Tumor	HL
TCGA-YG-AA3N-01	1.16306	-0.550524	0	201	Primary Tumor	HL
TCGA-BF-A3DN-01	-0.971851	0.292431	0	32	Primary Tumor	LH
TCGA-BF-AAOX-01	-0.348357	0.414949	0	11	Primary Tumor	LH
TCGA-BF-AAP2-01	-0.61338	0.550694	0	13	Primary Tumor	LH
TCGA-D3-A1Q4-06	-0.188218	0.538042	0	2856	Regional Lymph Node	LH
TCGA-D3-A1Q8-06	-0.449634	0.391198	1	854	Regional Lymph Node	LH
TCGA-D3-A1QA-06	-0.171661	-0.0216813	0	955	Regional Lymph Node	LH
TCGA-D3-A2JE-06	-0.548166	0.351505	1	701	Regional Lymph Node	LH
TCGA-D3-A2JK-06	-1.36759	0.905519	1	192	Regional Lymph Node	LH
TCGA-D3-A3C1-06	-0.214708	0.194115	0	26	Regional Lymph Node	LH
TCGA-D3-A3CC-06	-1.18789	-0.12324	0	1391	Regional Cutaneous or Subcutaneous Tissue (includes satellite and in-transit metastasis)	LH
TCGA-D3-A51N-06	-0.144624	1.34147	0	269	Regional Lymph Node	LH
TCGA-D3-A8GI-06	-1.19329	-0.0678209	1	127	Regional Lymph Node	LH
TCGA-DA-A1I0-06	-0.574044	2.06973	0	26	Regional Cutaneous or Subcutaneous Tissue (includes satellite and in-transit metastasis)	LH
TCGA-DA-A1IC-06	-0.821945	0.604377	0	57	Regional Cutaneous or Subcutaneous Tissue (includes satellite and in-transit metastasis)	LH
TCGA-DA-A95Y-06	-1.26041	0.61027	0	31	Regional Lymph Node	LH
TCGA-EB-A24D-01	-0.199242	-0.144641	0	42	Primary Tumor	LH
TCGA-EB-A3XD-01	-0.580117	1.98382	0	0	Primary Tumor	LH
TCGA-EB-A3XE-01	-0.462997	0.702514	0	0	Primary Tumor	LH
TCGA-EB-A3Y7-01	-0.745353	-8.71631e-05	0	0	Primary Tumor	LH
TCGA-EB-A4OY-01	-0.607651	0.220131	0	0	Primary Tumor	LH
TCGA-EB-A553-01	-0.511651	0.956152	0	13	Primary Tumor	LH
TCGA-EB-A5KH-06	-1.15637	0.865292	0	4	Regional Lymph Node	LH
TCGA-EB-A5SH-06	-0.512998	1.89449	0	0	Regional Lymph Node	LH
TCGA-EB-A6QY-01	-0.524354	-0.065531	0	-5	Primary Tumor	LH
TCGA-EE-A17X-06	-1.00674	0.0436222	1	352	Regional Lymph Node	LH
TCGA-EE-A29C-06	-0.744989	0.568054	0	1155	Regional Lymph Node	LH
TCGA-EE-A29G-06	-0.311463	0.645326	1	260	Regional Cutaneous or Subcutaneous Tissue (includes satellite and in-transit metastasis)	LH
TCGA-EE-A29L-06	-1.0922	0.139971	1	33	Regional Lymph Node	LH
TCGA-EE-A29R-06	-0.687877	-0.0294595	0	269	Regional Lymph Node	LH
TCGA-EE-A29S-06	-0.215179	0.328737	0	304	Regional Lymph Node	LH
TCGA-EE-A29X-06	-0.17637	0.442252	1	246	Regional Lymph Node	LH
TCGA-EE-A2GB-06	-0.52056	-0.143369	0	1198	Regional Lymph Node	LH
TCGA-EE-A2GP-06	-0.587351	0.0564046	1	165	Regional Cutaneous or Subcutaneous Tissue (includes satellite and in-transit metastasis)	LH
TCGA-EE-A2GS-06	-0.208844	-0.0289094	0	396	Regional Cutaneous or Subcutaneous Tissue (includes satellite and in-transit metastasis)	LH
TCGA-EE-A2ML-06	-0.217473	0.794243	0	3404	Regional Lymph Node	LH
TCGA-EE-A2MQ-06	-0.566488	0.212489	1	657	Regional Lymph Node	LH
TCGA-EE-A3AH-06	-0.863244	-0.0051066	1	387	Regional Lymph Node	LH
TCGA-ER-A19H-06	-0.41453	0.0344838	1	1061	Regional Cutaneous or Subcutaneous Tissue (includes satellite and in-transit metastasis)	LH
TCGA-ER-A42K-06	-1.13326	0.279278	0	171	Regional Lymph Node	LH
TCGA-FR-A8YD-06	-0.855389	0.175156	0	143	Distant Metastasis	LH
TCGA-FS-A1YW-06	-0.699879	0.479234	1	1961	Regional Lymph Node	LH
TCGA-FS-A1Z7-06	-1.12666	-0.0734436	1	223	Regional Lymph Node	LH
TCGA-FS-A1ZB-06	-0.951106	1.37375	1	103	Distant Metastasis	LH
TCGA-FS-A1ZQ-06	-1.07392	0.505329	1	263	Distant Metastasis	LH
TCGA-FS-A1ZR-06	-0.738234	0.209207	1	268	Regional Cutaneous or Subcutaneous Tissue (includes satellite and in-transit metastasis)	LH
TCGA-FS-A4FC-06	-0.444866	0.426556	0	195	Regional Cutaneous or Subcutaneous Tissue (includes satellite and in-transit metastasis)	LH
TCGA-GN-A4U4-06	-0.329565	0.377121	0	742	Regional Lymph Node	LH
TCGA-GN-A4U7-06	-1.14368	-0.0885023	0	118	Regional Lymph Node	LH
TCGA-WE-A8JZ-06	-0.511705	-0.0556827	0	360	Regional Lymph Node	LH
TCGA-WE-A8ZT-06	-0.771711	0.0185815	0	104	Regional Lymph Node	LH
TCGA-WE-AAA3-06	-0.209736	0.0394701	0	59	Regional Lymph Node	LH
TCGA-XV-A9VZ-01	-1.30661	0.593165	0	9	Primary Tumor	LH
TCGA-XV-AAZY-01	-0.14146	1.69584	0	13	Primary Tumor	LH
TCGA-YG-AA3O-06	-0.189155	-0.0858672	0	188	Regional Lymph Node	LH
TCGA-3N-A9WB-06	-1.26686	-1.03869	1	92	Distant Metastasis	LL
TCGA-BF-A1PU-01	-0.859231	-0.483866	0	387	Primary Tumor	LL
TCGA-BF-A1PV-01	-0.787585	-1.13325	0	14	Primary Tumor	LL
TCGA-BF-A1PZ-01	-0.134958	-0.241139	0	12	Primary Tumor	LL
TCGA-BF-A3DJ-01	-0.670074	-1.14647	0	464	Primary Tumor	LL
TCGA-BF-A3DL-01	-1.1718	-0.751576	0	28	Primary Tumor	LL
TCGA-BF-A3DM-01	-1.08849	-1.27648	0	14	Primary Tumor	LL
TCGA-BF-A5EO-01	-0.356123	-0.550233	0	338	Primary Tumor	LL
TCGA-BF-A5EP-01	-1.15001	-1.2252	0	11	Primary Tumor	LL
TCGA-BF-A5ER-01	-1.34199	-0.555212	0	12	Primary Tumor	LL
TCGA-BF-A9VF-01	-1.07167	-0.761322	0	12	Primary Tumor	LL
TCGA-BF-AAP1-01	-1.02112	-0.992779	0	14	Primary Tumor	LL
TCGA-BF-AAP6-01	-1.14149	-0.781242	0	15	Primary Tumor	LL
TCGA-BF-AAP8-01	-0.89627	-1.12812	0	14	Primary Tumor	LL
TCGA-D3-A1Q1-06	-1.26394	-1.20568	1	501	Regional Lymph Node	LL
TCGA-D3-A1Q5-06	-1.35265	-0.888476	1	986	Regional Lymph Node	LL
TCGA-D3-A2JG-06	-0.125517	-0.291105	1	228	Regional Lymph Node	LL
TCGA-D3-A3C6-06	-1.2467	-1.01227	1	464	Regional Lymph Node	LL
TCGA-D3-A3ML-06	-1.29934	-1.12381	1	192	Regional Lymph Node	LL
TCGA-D3-A3MO-06	-1.31964	-1.27648	1	284	Regional Cutaneous or Subcutaneous Tissue (includes satellite and in-transit metastasis)	LL
TCGA-D3-A3MV-06	-1.31659	-1.19879	0	164	Regional Cutaneous or Subcutaneous Tissue (includes satellite and in-transit metastasis)	LL
TCGA-D3-A51R-06	-1.29872	-1.17251	0	623	Regional Lymph Node	LL
TCGA-D3-A5GL-06	-0.818428	-1.07215	0	2901	Regional Lymph Node	LL
TCGA-D3-A5GT-01	-1.25741	-0.756617	0	154	Primary Tumor	LL
TCGA-D3-A8GC-06	-0.602925	-0.564789	1	671	Regional Lymph Node	LL
TCGA-D3-A8GK-06	-1.30278	-1.242	0	2889	Distant Metastasis	LL
TCGA-D3-A8GL-06	-1.24905	-1.17321	1	1184	Regional Cutaneous or Subcutaneous Tissue (includes satellite and in-transit metastasis)	LL
TCGA-D3-A8GP-06	-0.769135	-1.21311	0	2665	Distant Metastasis	LL
TCGA-D3-A8GQ-06	-0.40973	-1.14794	1	348	Distant Metastasis	LL
TCGA-D3-A8GR-06	-1.31561	-1.23562	1	169	Distant Metastasis	LL
TCGA-D3-A8GV-06	-0.871916	-0.664413	1	619	Distant Metastasis	LL
TCGA-D9-A4Z2-01	-1.27754	-0.6312	0	86	Primary Tumor	LL
TCGA-D9-A4Z3-01	-0.826951	-1.16626	0	104	Primary Tumor	LL
TCGA-D9-A4Z5-01	-1.33096	-1.27648	0	29	[Not Available]	LL
TCGA-D9-A4Z6-06	-0.732404	-1.1718	0	174	Regional Lymph Node	LL
TCGA-D9-A6EA-06	-1.15543	-1.04746	0	344	[Discrepancy]	LL
TCGA-D9-A6EC-06	-1.03369	-1.23237	0	402	Regional Lymph Node	LL
TCGA-D9-A6EG-06	-1.28566	-0.598939	1	444	Regional Cutaneous or Subcutaneous Tissue (includes satellite and in-transit metastasis)	LL
TCGA-DA-A1HY-06	-0.74298	-1.23702	0	1189	Regional Lymph Node	LL
TCGA-DA-A1I4-06	-1.27431	-1.02424	0	34	Regional Cutaneous or Subcutaneous Tissue (includes satellite and in-transit metastasis)	LL
TCGA-DA-A1I8-06	-1.33435	-1.24194	0	124	Regional Cutaneous or Subcutaneous Tissue (includes satellite and in-transit metastasis)	LL
TCGA-DA-A1IA-06	-0.760673	-1.01875	0	32	Distant Metastasis	LL
TCGA-DA-A3F3-06	-0.407838	-0.632199	0	45	Regional Lymph Node	LL
TCGA-DA-A3F5-06	-0.2211	-1.25325	0	57	Regional Lymph Node	LL
TCGA-DA-A95W-06	-0.688985	-0.285344	0	31	Regional Lymph Node	LL
TCGA-DA-A95X-06	-0.642838	-0.707749	0	31	Regional Lymph Node	LL
TCGA-DA-A95Z-06	-0.745389	-0.957767	0	27	Regional Cutaneous or Subcutaneous Tissue (includes satellite and in-transit metastasis)	LL
TCGA-DA-A960-01	-1.22924	-0.716927	0	39	Regional Cutaneous or Subcutaneous Tissue (includes satellite and in-transit metastasis)	LL
TCGA-EB-A1NK-01	-0.712208	-0.482649	0	16	Primary Tumor	LL
TCGA-EB-A24C-01	-1.34516	-0.825826	0	14	Primary Tumor	LL
TCGA-EB-A3HV-01	-1.05884	-0.53477	0	39	Primary Tumor	LL
TCGA-EB-A3XF-01	-0.830477	-0.706513	0	4	Primary Tumor	LL
TCGA-EB-A41A-01	-0.939893	-0.76326	0	8	Primary Tumor	LL
TCGA-EB-A41B-01	-0.270477	-0.221153	0	3	Primary Tumor	LL
TCGA-EB-A42Y-01	-0.873937	-1.22467	0	6	Primary Tumor	LL
TCGA-EB-A42Z-01	-0.249832	-0.910848	0	12	Primary Tumor	LL
TCGA-EB-A431-01	-0.732386	-0.765978	0	52	Primary Tumor	LL
TCGA-EB-A44O-01	-0.641694	-0.850748	0	5	Primary Tumor	LL
TCGA-EB-A44P-01	-0.238623	-0.340196	0	7	Primary Tumor	LL
TCGA-EB-A4IQ-01	-1.23779	-1.03388	0	4	Primary Tumor	LL
TCGA-EB-A4P0-01	-0.124707	-0.351825	0	-2	Primary Tumor	LL
TCGA-EB-A51B-01	-0.653728	-1.21112	0	-5	Primary Tumor	LL
TCGA-EB-A550-01	-0.764589	-0.989656	0	6	Primary Tumor	LL
TCGA-EB-A5FP-01	-0.544377	-1.12874	0	-5	Primary Tumor	LL
TCGA-EB-A5SE-01	-1.13051	-0.902247	0	0	Primary Tumor	LL
TCGA-EB-A5SF-01	-1.36759	-0.878033	0	0	Primary Tumor	LL
TCGA-EB-A5UN-06	-0.577255	-1.17055	0	2	Distant Metastasis	LL
TCGA-EB-A5VU-01	-0.965098	-0.957331	0	4	Primary Tumor	LL
TCGA-EB-A6QZ-01	-1.15841	-0.852933	0	-3	Primary Tumor	LL
TCGA-EB-A82C-01	-0.772615	-0.735073	0	4	Primary Tumor	LL
TCGA-EB-A97M-01	-0.311155	-0.630804	0	11	Primary Tumor	LL
TCGA-EE-A17Z-06	-1.20358	-1.22587	1	192	Regional Lymph Node	LL
TCGA-EE-A180-06	-0.809562	-0.715328	1	247	Distant Metastasis	LL
TCGA-EE-A182-06	-1.04663	-0.522639	1	41	Distant Metastasis	LL
TCGA-EE-A185-06	-1.31466	-1.09223	1	131	Regional Lymph Node	LL
TCGA-EE-A20C-06	-1.27805	-1.16893	1	132	Distant Metastasis	LL
TCGA-EE-A20H-06	-0.709996	-0.916729	1	280	Distant Metastasis	LL
TCGA-EE-A29A-06	-1.32083	-1.07442	1	243	Distant Metastasis	LL
TCGA-EE-A29B-06	-1.15156	-1.1299	0	301	Distant Metastasis	LL
TCGA-EE-A29D-06	-1.15535	-1.02706	1	339	Regional Lymph Node	LL
TCGA-EE-A29E-06	-1.07211	-1.11475	0	1175	Regional Lymph Node	LL
TCGA-EE-A29Q-06	-0.511495	-0.487221	0	246	Regional Cutaneous or Subcutaneous Tissue (includes satellite and in-transit metastasis)	LL
TCGA-EE-A29V-06	-0.983484	-0.511323	1	74	Distant Metastasis	LL
TCGA-EE-A29W-06	-1.34316	-1.05147	0	264	Regional Lymph Node	LL
TCGA-EE-A2A5-06	-1.20903	-0.188542	1	294	Regional Cutaneous or Subcutaneous Tissue (includes satellite and in-transit metastasis)	LL
TCGA-EE-A2GM-06	-0.687026	-1.02724	0	861	Regional Cutaneous or Subcutaneous Tissue (includes satellite and in-transit metastasis)	LL
TCGA-EE-A2GN-06	-0.768551	-0.349202	0	1029	Regional Cutaneous or Subcutaneous Tissue (includes satellite and in-transit metastasis)	LL
TCGA-EE-A2GO-06	-1.04274	-1.25644	0	938	Regional Cutaneous or Subcutaneous Tissue (includes satellite and in-transit metastasis)	LL
TCGA-EE-A2GR-06	-1.32954	-1.02058	0	35	Regional Cutaneous or Subcutaneous Tissue (includes satellite and in-transit metastasis)	LL
TCGA-EE-A2M5-06	-0.309187	-1.04571	1	269	Regional Lymph Node	LL
TCGA-EE-A2M6-06	-0.317334	-0.654364	0	2989	Regional Lymph Node	LL
TCGA-EE-A2MM-06	-0.728355	-0.960192	1	1704	Regional Lymph Node	LL
TCGA-EE-A2MS-06	-0.365744	-1.13572	0	826	Regional Lymph Node	LL
TCGA-EE-A2MT-06	-0.622289	-0.522657	0	701	Regional Lymph Node	LL
TCGA-EE-A3AB-06	-0.469128	-0.860615	0	3733	Regional Lymph Node	LL
TCGA-EE-A3AD-06	-1.17963	-1.22248	0	112	Regional Lymph Node	LL
TCGA-EE-A3AG-06	-1.22704	-1.26041	0	485	Regional Cutaneous or Subcutaneous Tissue (includes satellite and in-transit metastasis)	LL
TCGA-EE-A3J4-06	-0.202422	-0.219313	1	697	Regional Cutaneous or Subcutaneous Tissue (includes satellite and in-transit metastasis)	LL
TCGA-EE-A3J7-06	-0.646751	-0.988518	0	657	Regional Cutaneous or Subcutaneous Tissue (includes satellite and in-transit metastasis)	LL
TCGA-EE-A3J8-06	-1.10124	-1.27648	1	491	Regional Cutaneous or Subcutaneous Tissue (includes satellite and in-transit metastasis)	LL
TCGA-EE-A3JB-06	-0.386763	-0.23862	0	29	Regional Cutaneous or Subcutaneous Tissue (includes satellite and in-transit metastasis)	LL
TCGA-EE-A3JI-06	-0.925227	-0.961027	0	1022	Regional Lymph Node	LL
TCGA-ER-A196-01	-0.934047	-0.948564	0	477	Primary Tumor	LL
TCGA-ER-A19B-06	-1.15609	-1.25528	1	766	Regional Cutaneous or Subcutaneous Tissue (includes satellite and in-transit metastasis)	LL
TCGA-ER-A19C-06	-1.33882	-0.884256	1	115	Regional Lymph Node	LL
TCGA-ER-A19E-06	-1.13164	-0.768994	1	362	Regional Lymph Node	LL
TCGA-ER-A19F-06	-0.406312	-0.493113	1	338	Regional Lymph Node	LL
TCGA-ER-A19J-06	-0.915136	-0.727285	1	128	Regional Lymph Node	LL
TCGA-ER-A19K-01	-0.190934	-0.448741	1	439	Primary Tumor	LL
TCGA-ER-A19L-06	-1.20252	-0.572417	1	409	Regional Lymph Node	LL
TCGA-ER-A19T-01	-1.33598	-1.27648	1	200	Primary Tumor	LL
TCGA-ER-A19T-06	-0.131054	-1.03246	1	200	Primary Tumor	LL
TCGA-ER-A2NC-06	-0.797498	-1.21775	1	359	Distant Metastasis	LL
TCGA-ER-A2ND-06	-0.34783	-0.922585	1	57	Distant Metastasis	LL
TCGA-ER-A2NE-06	-1.29081	-1.18788	1	46	Distant Metastasis	LL
TCGA-ER-A3ES-06	-1.33552	-1.27648	1	275	Distant Metastasis	LL
TCGA-ER-A3PL-06	-0.58749	-1.18042	0	52	Regional Cutaneous or Subcutaneous Tissue (includes satellite and in-transit metastasis)	LL
TCGA-ER-A42H-01	-1.31258	-1.10572	1	312	Primary Tumor	LL
TCGA-FR-A2OS-01	-1.31884	-1.20214	1	368	Primary Tumor	LL
TCGA-FR-A3YO-06	-1.28981	-1.15957	0	0	Distant Metastasis	LL
TCGA-FR-A69P-06	-0.895922	-0.698887	0	149	Regional Lymph Node	LL
TCGA-FR-A726-01	-0.890747	-1.22272	0	232	Primary Tumor	LL
TCGA-FR-A7U8-06	-1.15799	-1.24528	0	109	Distant Metastasis	LL
TCGA-FR-A8YC-06	-0.259599	-1.27648	1	67	Distant Metastasis	LL
TCGA-FS-A1YX-06	-1.0927	-0.707844	1	105	Regional Cutaneous or Subcutaneous Tissue (includes satellite and in-transit metastasis)	LL
TCGA-FS-A1YY-06	-1.34992	-0.474816	1	335	Distant Metastasis	LL
TCGA-FS-A1Z3-06	-1.27748	-0.317345	1	433	Distant Metastasis	LL
TCGA-FS-A1ZC-06	-1.2353	-1.25915	1	620	Distant Metastasis	LL
TCGA-FS-A1ZD-06	-1.33208	-1.15614	1	250	Regional Lymph Node	LL
TCGA-FS-A1ZE-06	-1.11282	-0.295014	0	594	Distant Metastasis	LL
TCGA-FS-A1ZF-06	-0.920237	-0.799126	1	337	Distant Metastasis	LL
TCGA-FS-A1ZG-06	-1.20918	-0.710013	1	218	Regional Lymph Node	LL
TCGA-FS-A1ZJ-06	-0.95165	-0.418395	1	393	Regional Lymph Node	LL
TCGA-FS-A1ZK-06	-1.29706	-0.868975	1	392	Distant Metastasis	LL
TCGA-FS-A1ZN-01	-1.22496	-1.25132	1	730	Primary Tumor	LL
TCGA-FS-A1ZS-06	-0.945782	-0.548006	0	1495	Regional Lymph Node	LL
TCGA-FS-A1ZU-06	-1.20897	-1.21032	1	264	Distant Metastasis	LL
TCGA-FS-A1ZY-06	-1.24607	-1.27648	1	25	Distant Metastasis	LL
TCGA-FS-A1ZZ-06	-0.750179	-0.855242	1	159	Distant Metastasis	LL
TCGA-FS-A4F0-06	-1.30998	-0.869635	0	1638	Regional Cutaneous or Subcutaneous Tissue (includes satellite and in-transit metastasis)	LL
TCGA-FS-A4F2-06	-1.19301	-0.521377	1	98	Regional Cutaneous or Subcutaneous Tissue (includes satellite and in-transit metastasis)	LL
TCGA-FS-A4F5-06	-0.757641	-0.470575	1	874	Regional Cutaneous or Subcutaneous Tissue (includes satellite and in-transit metastasis)	LL
TCGA-FS-A4F9-06	-1.18329	-0.663907	0	328	Regional Lymph Node	LL
TCGA-FS-A4FB-06	-1.01004	-0.98193	1	182	Regional Lymph Node	LL
TCGA-FS-A4FD-06	-0.157608	-0.585149	0	69	Regional Lymph Node	LL
TCGA-FW-A3I3-06	-0.397128	-1.24086	0	6	Distant Metastasis	LL
TCGA-FW-A3TU-06	-1.06471	-0.172684	0	4	Distant Metastasis	LL
TCGA-FW-A5DX-01	-1.09943	-0.650953	0	48	Primary Tumor	LL
TCGA-GF-A769-01	-0.994427	-1.27648	1	1070	Primary Tumor	LL
TCGA-GN-A262-06	-1.35454	-1.26626	0	756	Regional Cutaneous or Subcutaneous Tissue (includes satellite and in-transit metastasis)	LL
TCGA-GN-A264-06	-1.22142	-1.11015	1	953	Regional Lymph Node	LL
TCGA-GN-A268-06	-1.11137	-1.18081	1	469	Regional Lymph Node	LL
TCGA-GN-A26D-06	-0.71	-0.185076	0	447	Regional Lymph Node	LL
TCGA-GN-A4U3-06	-0.903557	-1.10715	0	1058	Distant Metastasis	LL
TCGA-GN-A8LK-06	-1.13208	-1.21223	1	441	Distant Metastasis	LL
TCGA-GN-A8LL-06	-0.715223	-1.17486	1	441	Regional Lymph Node	LL
TCGA-GN-A8LN-01	-0.388404	-0.212377	0	396	Primary Tumor	LL
TCGA-HR-A5NC-01	-1.27104	-1.06033	0	1000	Primary Tumor	LL
TCGA-IH-A3EA-01	-0.81594	-1.06459	0	383	Primary Tumor	LL
TCGA-LH-A9QB-06	-1.28646	-0.560428	0	13	Distant Metastasis	LL
TCGA-OD-A75X-06	-0.447078	-1.01819	0	336	Distant Metastasis	LL
TCGA-RP-A690-06	-1.09723	-1.08968	0	6	Distant Metastasis	LL
TCGA-RP-A6K9-06	-0.368856	-0.823076	0	821	Distant Metastasis	LL
TCGA-W3-A828-06	-0.504637	-0.618869	1	1826	Distant Metastasis	LL
TCGA-W3-AA1O-06	-1.1049	-0.684747	1	91	Regional Lymph Node	LL
TCGA-W3-AA1V-06	-0.752644	-1.21368	1	334	Regional Lymph Node	LL
TCGA-WE-A8K6-06	-1.08366	-0.925075	0	216	Regional Lymph Node	LL
TCGA-WE-A8ZM-06	-1.36759	-0.943498	0	568	Regional Cutaneous or Subcutaneous Tissue (includes satellite and in-transit metastasis)	LL
TCGA-WE-A8ZQ-06	-1.33017	-0.956644	0	113	Regional Lymph Node	LL
TCGA-WE-A8ZY-06	-0.606312	-0.174002	0	163	Regional Cutaneous or Subcutaneous Tissue (includes satellite and in-transit metastasis)	LL
TCGA-XV-A9W2-01	-0.862434	-0.279802	0	12	Primary Tumor	LL
TCGA-XV-A9W5-01	-0.294574	-0.901381	0	15	Primary Tumor	LL
TCGA-XV-AAZW-01	-1.16715	-0.412445	0	18	Primary Tumor	LL
TCGA-YD-A89C-06	-0.87784	-1.18405	0	8	Distant Metastasis	LL
TCGA-YD-A9TB-06	-0.755528	-0.742759	0	201	Distant Metastasis	LL
TCGA-YG-AA3P-06	-1.18713	-1.18647	0	143	Distant Metastasis	LL
TCGA-Z2-AA3S-06	-0.315537	-0.453237	0	203	Regional Lymph Node	LL
