# Supplementary material for: Ex Vivo Profiling of PD-1 Blockade Using Organotypic Tumor Spheroids
Source: Oxford University Press journal article supplement (doi:10.1158/2159-8290.cd-17-0833), 2017-11-03
Supplement: 21598290cd170833-sup-186804_2_supp_4355519_tyg2tk.xlsx [file 21598290cd170833-sup-186804_2_supp_4355519_tyg2tk.xlsx]

## Sheet: Table S3a_PDOTS
Table S3a
Patient Characteristics and Treatment History
ID	Age/Sex	Diagnosis	Stage	Mutational Status	Prior Therapy	Therapy at Time of Biopsy	Site	Subsequent Therapy
MGH-01	78/M	Melanoma (cutaneous)	IV	BRAFWT, NRASWT	None	None	subcutaneous	None
MGH-02	69/M	Melanoma (cutaneous)	IIIB	N/A	None	None	lymph node	None
MGH-03	49/M	Melanoma (cutaneous)	IV	N/A	None	None	lymph node	BRAFi+MEKi à aPD-1+ aCTLA-4
MGH-04 (**)	28/M	Melanoma (cutaneous)	IV	BRAFV600E	None	None	subcutaneous	aPD-1+ aCTLA-4à aPD-1 maintenance
MGH-05	70/M	Melanoma (cutaneous)	IV	BRAFWT, NRASG13V	aCTLA-4à aPD-1à clinical trial	None	subcutaneous	None
MGH-06	78/M	Melanoma (cutaneous)	IV	BRAFWT, NRASWT	aPD-1	aPD-1	lymph node	aPD-1 (irAE) à aCTLA-4
MGH-07 (**)	28/M	Melanoma (cutaneous)	IV	BRAFV600E	aPD-1+ aCTLA-4	aPD-1+ aCTLA-4	Subcutaneous	aPD-1
MGH-08	80/M	Melanoma (cutaneous)	IV	BRAFV600K	aPD-1+	aPD-1	Subcutaneous	aCTLA-4à BRAFi + MEKi
MGH-09	69/F	Melanoma (cutaneous)	IV	BRAFV600E	aPD-1 à irAE	None	Subcutaneous	BRAFi + MEKi
MGH-10	74/F	Melanoma (mucosal)	IV	KIT D816A	Chemotherapy, radiation, surgery à aCTLA-4à aPD-1	None	Small bowel	None
MGH-11	63/F	Melanoma (cutaneous)	IV	N/A	BRAFi/MEKi	None	Lymph node	aPD-1
MGH-12 ()	61/M	Melanoma (cutaneous)	IV	TP53	aCTLA-4 (PD) à aPD-1 (MR)	aPD-1	Brain metastasis	aPD-1
MGH-13	65/F	Thyroid cancer (papillary)	IV	BRAFV600E	Radioactive iodine	None	Subcutaneous	Radiation
MGH-14 ()	61/M	Melanoma (cutaneous)	IV	TP53	aPD-1	aPD-1	Brain metastasis	aPD-1 + radiation
MGH-16	62/M	Melanoma (sino-nasal)	IV	NRASG12D		None	Subcutaneous	None
					Anti-PD-L1 + MEKi (PD) à high-dose IL-2 (AE) à aCTLA-4 (PD) à aPD-1(MRàPD) à SIRT (liver metastases) à pan-RAFi (PD)
MGH-18	68/M	Melanoma (cutaneous)	IV	NRASQ61R		aPD-1	Subcutaneous	aPD-1
					Radiation à anti-PD-1 + anti-KIR (irAE) à aCTLA-4 (PD) à pan-RAFi (PD) à aPD-1 + radiation
MGH-19	24/F	Adreno-cortical carcinoma	II	N/A	None	None	Primary	None
DFCI-01	73/F	Melanoma (cutaneous)	III	Not tested	None	Unknown	Lymph node	N/A
DFCI-02 (#)	81/M	Melanoma (cutaneous)	IV	CDKN2A (Q50*)	aCTLA-4, aPD-1	aPD-1	Subcutaneous	aPD-1
DFCI-04	72/F	Mesothelioma	IV	9p del, polysomy 22	None	Unknown	Primary (partial pleurectomy)	None
DFCI-06	42/F	Merkel cell carcinoma	IV	BRCA2 (F439V)	None	None	Subcutaneous	None
DFCI-07	58/M	NSCLC/lung adeno-carcinoma	IV	KRAS/ LKB1	Chemotherapy (PD) à aPD-1	None	Peritoneal fluid	None
DFCI-09	45/M	Pancreatic adenocarcinoma	IIB	KRASG12D, TP53	None	None	Pancreas (Whipple)	None
DFCI-10 (^)	55/M	Thyroid cancer (Hurthle cell)	IV	TP53, MSH2, PTEN	None	None	Subcutaneous	lenvatinib
DFCI-12	58/F	Head/neck squamous cell carcinoma	IV	Unknown	Cisplatin	None	Pleural biopsy (VATS)	aPD-L1
DFCI-13 (*)	76/M	Thyroid cancer (papillary)	IV	Unknown	MLN-0128	MLN-0128	Pleural effusion	MLN-0128
DFCI-15	75/F	Thyroid cancer (papillary)	IV	BRAFV600E	MLN-0128	MLN-0128	Pleural effusion	None
DFCI-16 (*)	76/M	Thyroid cancer (papillary)	IV	Unknown	MLN-0128	None	Pleural effusion	nivolumab
DFCI-17 (#)	81/M	Melanoma (cutaneous)	IV	CDKN2A (Q50*)	RTA 408 + aCTLA-4	RTA 408 + aCTLA-4	Subcutaneous	N/A
DFCI-18 (*)	76/M	Thyroid cancer (papillary)	IV	Unknown	MLN-0128	None	Pleural effusion	nivolumab
DFCI-19	67/M	Pancreatic adenocarcinoma	IIA	Unknown	FOLFIRINOX à capecitabine + radiation	None	Pancreas (Whipple)	5-FU
DFCI-20	51/M	Thyroid cancer (papillary)	IV	None identified	lenvatinib	lenvatinib	Pleural effusion	MLN-0128
DFCI-21 (*)	76/M	Thyroid cancer (papillary)	IV	Unknown	aPD-1	aPD-1	Pleural effusion	aPD-1
DFCI-22 (*)	76/M	Thyroid cancer (papillary)	IV	Unknown	aPD-1	aPD-1	Pleural effusion	aPD-1
DFCI-24	79/M	Small cell lung cancer	IV	Unknown	cisplatin-etoposide à aPD-1	aPD-1	Pleural effusion	None
DFCI-25	68/M	Melanoma (cutaneous)	IV	NRASQ61K, CDKN2A Q50*)	aCTLA-4+aPD-1à aPD-1 maintenance à irAE	None	Lymph node	N/A
DFCI-27	72/M	Melanoma (cutaneous)	IV	BRAFWT	aPD-1	aPD-1	Subcutaneous	aPD-1
DFCI-29 (^)	55/M	Thyroid cancer (Hurthle cell)	IV	TP53, MSH2, PTEN	Lenvatinib à MLN-0128 à everolimus	everolimus	Subcutaneous	everolimus
DFCI-30	52/M	Merkel cell carcinoma	IV	Unknown	carboplatin-etoposide, radiation (recurrence)	None	Lymph node	aPD-1
DFCI-31	67/M	Merkel cell carcinoma	IV	Unknown	carboplatin-etoposide	None	Subcutaneous	aPD-1
DFCI-32	89/M	Merkel cell carcinoma	IIIb	Unknown	None	None	Primary	Radiation
DFCI-33	49/M	Thyroid cancer (differentiated)	IV	Unknown	Radioactive iodine	None	Pleural effusion	lenvatinib
(*)DFCI-13, 16, 18, 21, 22 represent serial pleural effusion samples from same patient.
(**) MGH-04 and MGH-07 are serial biopsies from the same patient.
(#) DFCI-02 and -17 are samples from same patient.
(^) DFCI-10 and DFCI-29 are samples from the same patient.
() MGH-12 and MGH-14 are serial samples from a patient with a brain metastasis requiring resection and subsequent re-resection.
AE = adverse event.
irAE = immune-related adverse event.

## Sheet: Table S3b_sample information
Table S3b
Melanoma Patient Samples
RNA-seq
Patient Treatment Details
Samples	Sample Biopsy ID	Treatment
148-S9	148-6-5-14_S9	pre-PD-1-combo (on trial)
148-S10	148-12-13-14_S10	post-PD-1-combo (on trial) (209 days)
208-S11	208-9-10-14_S11	pre-CTLA-4; pre-PD-1
208-S12	208-10-22-14_S12	on-CTLA-4 (42 days); pre-PD-1
208-S13	208-3-11-15_S13	post-CTLA-4 (182 days); pre-PD-1
208-S14	208-5-13-15_S14	post-CTLA-4 (245 days); on-PD-1 (63 days)
27-S1	27-3-8-12_S1	post-BRAFi (479 days); pre-PD-1
27-S2	27-7-2-13_S2	post-BRAFi (960 days); on-PD-1 (31 days)
39-S15	39-3-31-14_S15	post-BRAFi (393 days); post-IL2 (388 days); post-CTLA-4 (153 days); pre-BRAFi/MEKi; pre-PD-1
39-S16	39-8-25-14_S16	post-BRAFi (540 days); post-IL2 (535 days); post-CTLA-4 (300 days); post-BRAFi/MEKi (54 days); on-PD-1 (21 days)
39-S17	39-10-31-14_S17	post-BRAFi (607 days); post-IL2 (602 days); post-CTLA-4 (367 days); post-BRAFi/MEKi (121 days); on-PD-1 (88 days)
42-S3	42-10-17-14_S3	post-CTLA-4 (176 days); post-BRAFi/MEKi (64 days); pre-PD-1
42-S4	42-11-24-14_S4	post-CTLA-4 (214 days); post-BRAFi/MEKi (102 days); on-PD-1 (38 days)
42-S5	42-12-30-14_S5	post-CTLA-4 (250 days); post-BRAFi/MEKi (138 days); post-PD-1 (74 days)
62-S6	62-10-2-13_S6	pre-CTLA-4; pre-PD-1
62-S7	62-5-27-14_S7	post-CTLA-4 (235 days); on-PD-1 (3 days)
62-S8	62-7-8-14_S8	post-CTLA-4 (277 days); on-PD-1 (45 days)
272-S1	272-121914	pre-CTLA-4
272-S2	272-020415	post-CTLA-4 (47 days); pre-PD-1
272-S3	272-022916	post-CTLA-4 (437 days); post-PD-1 (346 days)
422-S1	422-092815	pre-PD-1, pre-CTLA-4 (day -3)
422-S2	422-110515	on-PD-1, on-CTLA-4 (Day +45)
51-S1	51-081413	pre-PD-L1
51-S2	51-041814	post-PD-L1 (224 days)
98-S1	98-020514	post-PD-1 (83 days); pre-CTLA-4
98-S2	98-030314	post-PD-1 (109 days); post-CTLA-4 (25 days)
98-S3	98-051514	post-PD-1 (182 days); post-CTLA-4 (98 days)

## Sheet: Table S3c_RNA-seq_raw.FC.L2FC
Table S3c
Melanoma Patient Samples
RNA-seq
Samples	148-S9	148-S10	208-S11	208-S12	208-S13	208-S14	27-S1	27-S2	39-S15	39-S16	39-S17	42-S3	42-S4	42-S5	62-S6	62-S7	62-S8	272-S1	272-S2	272-S3	422-S1	422-S2	51-S1	51-S2	98-S1	98-S2	98-S3
Treatment	pre-PD-1-combo (on trial)	post-PD-1-combo (on trial) (209 days)	pre-CTLA-4; pre-PD-1	on-CTLA-4 (42 days); pre-PD-1	post-CTLA-4 (182 days); pre-PD-1	post-CTLA-4 (245 days); on-PD-1 (63 days)	post-BRAFi (479 days); pre-PD-1	post-BRAFi (960 days); on-PD-1 (31 days)	post-BRAFi (393 days); post-IL2 (388 days); post-CTLA-4 (153 days); pre-BRAFi/MEKi; pre-PD-1	post-BRAFi (540 days); post-IL2 (535 days); post-CTLA-4 (300 days); post-BRAFi/MEKi (54 days); on-PD-1 (21 days)	post-BRAFi (607 days); post-IL2 (602 days); post-CTLA-4 (367 days); post-BRAFi/MEKi (121 days); on-PD-1 (88 days)	post-CTLA-4 (176 days); post-BRAFi/MEKi (64 days); pre-PD-1	post-CTLA-4 (214 days); post-BRAFi/MEKi (102 days); on-PD-1 (38 days)	post-CTLA-4 (250 days); post-BRAFi/MEKi (138 days); post-PD-1 (74 days)	pre-CTLA-4; pre-PD-1	post-CTLA-4 (235 days); on-PD-1 (3 days)	post-CTLA-4 (277 days); on-PD-1 (45 days)	pre-CTLA-4	post-CTLA-4 (47 days); pre-PD-1	post-CTLA-4 (437 days); post-PD-1 (346 days)	pre-PD-1, pre-CTLA-4	on-PD-1, on-CTLA-4	pre-PD-L1	post-PD-L1 (224 days)	post-PD-1 (83 days); pre-CTLA-4	post-PD-1 (109 days); post-CTLA-4 (25 days)	post-PD-1 (182 days); post-CTLA-4 (98 days)
CCL19	0.156871	0.419133	1.98815	4.59582	3.45514	8.77085	0.1	0.937155	0.1	7.17238	0.576912	1.23267	5.18692	6.33513	0.1	0.192833	0.180825	30.8027	81.844	30.331	49.1698	569.522	31.3658	32.4153	0.17968	0.539289	47.9202
CXCL13	0.268031	2.38712	0.0943604	24.7655	2.17496	11.6557	1.27418	0.640493	1.62908	2.78518	13.8	0.234017	21.2471	3.9689	0.1	0.988427	0.205972	143.122	197.444	42.1785	88.5655	236.913	16.42	79.6634	1.33034	1.36021	68.8004
CCL2	0.1	0.1	0.1	0.1	0.1	0.1	0.1	0.1	0.1	0.1	0.1	0.1	0.1	0.1	0.1	0.1	0.1	0.1	0.1	0.1	0.1	0.1	0.1	0.1	0.1	0.1	0.1
CCL7	0.1	0.352523	0.139349	0.1	0.1	0.327865	0.1	0.1	0.283032	0.411308	0.485227	0.1	0.838959	1.24328	0.1	0.1	0.1	2.26839	2.20958	4.55339	27.1501	0.1	0.852966	0.0622459	0.151124	0.25919	0.480769
CCL8	19.5526	29.918	0.909715	3.97934	5.89116	8.66865	0.368527	3.80786	3.97262	2.50614	2.323	2.93296	34.1765	59.2506	7.98117	4.12936	0.0992875	38.0092	21.2212	12.1191	142.838	3.00566	6.96056	12.0283	1.28257	2.1574	18.204
CCL13	24.0119	82.8962	3.06992	9.11382	6.00656	10.3634	0.360472	0.301997	2.57546	5.90954	1.08447	3.64124	67.6626	58.3525	5.93524	8.85495	1.16541	7.73809	10.0938	4.97652	13.043	2.2235	24.9772	3.04072	0.796145	0.496528	23.4856
IL10	2.70809	3.17659	0.418558	1.4141	0.689113	1.88753	0.0941991	0.236755	1.91281	1.50998	6.15373	0.346013	5.8799	2.4896	0.167677	0.649542	0.22841	10.9175	12.1676	3.65302	2.56685	2.03367	2.37903	1.43341	0.264791	0.551453	2.32656
VEGFA	3.53392	4.83525	1.29428	0.867055	1.65187	1.23934	1.58514	2.89437	2.44542	1.59918	1.08304	0.298592	2.57328	0.920744	0.723485	1.68157	1.21549	1.59028	1.89992	4.36289	1.41619	0.518131	0.973853	0.712598	2.69306	6.84424	0.761546
VEGFC	6.12754	8.32348	0.815749	2.32085	1.85042	1.47148	1.24841	2.33788	0.994124	1.76572	1.00996	0.606925	3.9945	0.901104	1.56861	1.77229	0.949674	1.66184	2.8689	1.73147	1.96826	2.46116	6.20592	0.704483	0.855193	1.01153	5.75394
CCR7	0.43889	0.906134	0.421395	3.55172	0.971297	4.5112	0.113805	0.429047	0.213975	0.870665	0.880404	0.522537	0.913334	0.537101	0.202576	0.0980916	0.321941	8.27975	12.7855	4.44864	5.84632	95.5635	5.96946	8.15051	0.137101	0.0587849	4.26466
CXCR5	0.0694288	0.139127	0.183318	0.391163	0.20121	0.603844	0.1	0.0414772	0.0372339	0.144291	0.170222	0.0909271	0.441472	0.0934614	0.1	0.1	0.520198	1.09942	2.21363	0.798687	0.375967	48.1181	0.304572	1.75238	0.0198809	0.0170487	0.927621
AXL	32.5032	60.0636	2.91859	8.55069	6.30519	4.63248	2.56483	3.61623	3.15218	5.99379	5.59225	2.69997	10.0967	3.89712	4.64898	4.82579	2.45225	56.6522	74.8406	13.3028	10.9127	19.1432	2.54443	29.8948	0.48021	0.529456	144.039
GZMA	2.5155	9.76148	3.1628	53.7201	30.1325	28.5755	1.53751	13.8828	5.26767	14.8123	18.7958	3.45129	118.364	42.5699	8.66652	5.88985	3.59	80.8065	125.257	46.3161	41.8012	37.8346	10.1174	40.9634	1.79255	1.87878	27.1754
GZMB	3.13	3.09736	0.734612	33.0483	4.4347	8.6421	3.47191	10.5267	3.60585	22.4059	21.3166	3.64373	109.39	31.8349	1.03001	2.13752	7.61677	17.1664	16.401	3.82329	10.1579	4.13524	8.29445	14.8478	2.44928	3.15592	18.7537
IFNGR1	51.4519	56.8051	54.1266	61.4638	58.821	82.2106	43.6364	28.2519	81.092	110.99	60.15	79.9433	95.0516	75.0677	0.1	35.6154	11.8734	57.0564	61.1827	37.3128	44.6748	85.6737	184.214	47.2546	22.8699	32.4954	124.28
TNF	0.1	0.1	0.1	0.1	0.1	0.1	0.1	0.1	0.1	0.1	0.1	0.1	0.1	0.1	0.1	0.1	0.1	1.26259	1.58476	0.694074	1.36758	2.61714	0.331691	0.451835	0.11821	0.040548	0.732065
IL2	0.134572	0.179778	0.1	0.1	0.1	0.167203	0.1	0.1	0.144339	0.1	0.824845	0.1	0.1	0.362309	0.1	0.1	0.1	0.1	0.1	0.1	0.1	0.1	0.1	0.1	0.1	0.1	0.1
IFNG	0.266706	0.237532	0.1	3.00525	0.721405	2.09871	0.380366	1.06221	0.667481	0.461903	3.1605	0.11643	7.80108	4.30831	0.564217	0.327847	0.204954	10.2969	11.653	2.83209	2.88851	1.74662	0.123157	4.90717	0.0509142	0.0436609	10.0963
0.1	Below quantification
FC
	148	208a	208b	208c	27	39a	39b	42a	42b	62a	62b	272a	272b	422	51	98a	98b
CCL19	2.67184	2.31161	1.73786	4.41156	9.37155	71.7238	5.76912	4.20787	5.13936	1.92833	1.80825	2.65704	0.984688	11.5828	1.03346	3.00139	266.698
CXCL13	8.90613	262.456	23.0496	123.524	0.502669	1.70967	8.47109	90.7929	16.9599	9.88427	2.05972	1.37955	0.294704	2.675	4.85161	1.02245	51.7163
CCL2	1	1	1	1	1	1	1	1	1	1	1	1	1	1	1	1	1
CCL7	3.52523	0.717624	0.717624	2.35283	1	1.45322	1.71439	8.38959	12.4328	1	1	0.974076	2.00733	0.00368323	0.0729758	1.71508	3.18128
CCL8	1.53013	4.37427	6.47583	9.52897	10.3326	0.630855	0.584752	11.6526	20.2016	0.517388	0.0124402	0.558318	0.318846	0.0210424	1.72807	1.6821	14.1934
CCL13	3.4523	2.96875	1.95659	3.3758	0.837782	2.29456	0.421077	18.5823	16.0255	1.49193	0.196354	1.30443	0.64312	0.170474	0.12174	0.623665	29.4992
IL10	1.173	3.3785	1.6464	4.5096	2.51335	0.789403	3.21712	16.9933	7.1951	3.87378	1.3622	1.1145	0.334601	0.792284	0.602518	2.0826	8.7864
VEGFA	1.36824	0.669911	1.27628	0.957548	1.82593	0.653949	0.442883	8.61804	3.08362	2.32427	1.68005	1.19471	2.74348	0.365863	0.731731	2.54144	0.282781
VEGFC	1.35837	2.84505	2.26837	1.80384	1.87269	1.77616	1.01593	6.58154	1.4847	1.12985	0.605424	1.72634	1.0419	1.25043	0.113518	1.18281	6.72823
CCR7	2.0646	8.42847	2.30496	10.7054	3.77002	4.06901	4.11453	1.74788	1.02787	0.484222	1.58924	1.54418	0.537292	16.3459	1.36537	0.42877	31.1059
CXCR5	2.00388	2.13379	1.0976	3.29397	0.414772	3.87525	4.5717	4.85523	1.02787	1	5.20198	2.01345	0.726461	127.985	5.75357	0.85754	46.6588
AXL	1.84793	2.92973	2.16035	1.58723	1.40993	1.90148	1.77409	3.73956	1.44339	1.03803	0.527481	1.32105	0.234815	1.75421	11.7491	1.10255	299.95
GZMA	3.88053	16.985	9.52715	9.03488	9.02943	2.81192	3.56815	34.2956	12.3345	0.67961	0.414238	1.55009	0.573173	0.905108	4.04881	1.0481	15.1602
GZMB	0.98957	44.9874	6.03679	11.7642	3.03197	6.21376	5.91168	30.0215	8.73691	2.07524	7.39483	0.955409	0.222719	0.407097	1.79009	1.28851	7.65683
IFNGR1	1.10404	1.13556	1.08673	1.51886	0.64744	1.36869	0.74175	1.18899	0.939012	356.154	118.734	1.07232	0.653963	1.91772	0.25652	1.42088	5.43419
TNF	1	1	1	1	1	1	1	1	1	1	1	1.25517	0.549723	1.9137	1.36222	0.343016	6.1929
IL2	1.33592	1	1	1.67203	1	0.692811	5.71462	1	3.62309	1	1	1	1	1	1	1	1
IFNG	0.890613	30.0525	7.21405	20.9871	2.79261	0.692009	4.73497	67.0022	37.0034	0.581066	0.363255	1.13169	0.275042	0.604681	39.8448	0.85754	198.3
L2FC
	148	208a	208b	208c	27	39a	39b	42a	42b	62a	62b	272a	272b	422	51	98a	98b
CCL19	1.41783	1.2089	0.797315	2.14129	3.22829	6.16438	2.52835	2.07309	2.36159	0.947349	0.85459	1.40982	-0.022262	3.53391	0.0474813	1.58563	8.05906
CXCL13	3.1548	8.03593	4.52667	6.94864	-0.992319	0.773718	3.08255	6.50451	4.08405	3.30513	1.04245	0.464202	-1.76266	1.41954	2.27846	0.0320316	5.69255
CCL2	0	0	0	0	0	0	0	0	0	0	0	0	0	0	0	0	0
CCL7	1.81772	-0.478701	-0.478701	1.2344	0	0.539252	0.777692	3.0686	3.63608	0	0	-0.0378938	1.00527	-8.08481	-3.77644	0.778275	1.66961
CCL8	0.613652	2.12904	2.69506	3.25232	3.36914	-0.66462	-0.774103	3.54258	4.3364	-0.950682	-6.32884	-0.840842	-1.64907	-5.57056	0.78916	0.750261	3.82715
CCL13	1.78756	1.56986	0.96834	1.75523	-0.255353	1.19822	-1.24784	4.21586	4.00229	0.577177	-2.34847	0.383417	-0.63684	-2.55238	-3.03812	-0.681157	4.8826
IL10	0.230205	1.75638	0.719312	2.173	1.32961	-0.341166	1.68577	4.0869	2.84702	1.95374	0.445944	0.156396	-1.57949	-0.33591	-0.730923	1.05838	3.13527
VEGFA	0.452321	-0.577959	0.351941	-0.0625827	0.868635	-0.612751	-1.175	3.10736	1.62462	1.21677	0.748507	0.256662	1.45601	-1.45062	-0.450615	1.34564	-1.82224
VEGFC	0.441878	1.50846	1.18166	0.85107	0.905111	0.828759	0.0228047	2.71843	0.570175	0.176133	-0.723981	0.787718	0.0592228	0.322419	-3.13901	0.242222	2.75023
CCR7	1.04586	3.07527	1.20474	3.42027	1.91457	2.02468	2.04073	0.80561	0.0396602	-1.04626	0.668336	0.626844	-0.896223	4.03086	0.449291	-1.22172	4.95912
CXCR5	1.00279	1.09342	0.13435	1.71983	-1.26961	1.95429	2.19273	2.27954	0.0396602	0	2.37906	1.00967	-0.461044	6.99983	2.52446	-0.221725	5.54408
AXL	0.885911	1.55077	1.11127	0.66651	0.495619	0.92712	0.82708	1.90287	0.529465	0.0538518	-0.92281	0.401688	-2.0904	0.810823	3.55448	0.140845	8.22858
GZMA	1.95625	4.08619	3.25204	3.17551	3.17463	1.49156	1.83518	5.09995	3.62462	-0.557222	-1.27147	0.632352	-0.802957	-0.143839	2.0175	0.0677817	3.92222
GZMB	-0.015127	5.49145	2.59378	3.55633	1.60026	2.63547	2.56357	4.90793	3.12712	1.05328	2.88652	-0.0658101	-2.1667	-1.29655	0.840033	0.365702	2.93675
IFNGR1	0.142797	0.1834	0.119994	0.602988	-0.627181	0.452798	-0.430995	0.249734	-0.090785	8.47636	6.89159	0.100735	-0.612719	0.939392	-1.96286	0.506783	2.44206
TNF	0	0	0	0	0	0	0	0	0	0	0	0.327883	-0.863224	0.936365	0.445955	-1.54365	2.63062
IL2	0.417832	0	0	0.741598	0	-0.529465	2.51466	0	1.85722	0	0	0	0	0	0	0	0
IFNG	-0.16713	4.90941	2.85081	4.39143	1.48161	-0.531137	2.24336	6.06614	5.20959	-0.783225	-1.46095	0.178479	-1.86228	-0.725754	5.31632	-0.221725	7.63154

## Sheet: Table S3d_response data
Table S3d
Response Data
	Overall Survival (OS, Days)	Progression-Free Survival (OS, Days)	Response*	Status (last updated 10-17-2017)	best RECIST 1.1 Response (%)
51	1387	240	CB	Alive	1.5
98	1317	1317	CB	Alive	-70.8
272	910	306	CB	Alive	-22.9
MGH-09	843	843	CB	Alive	N/A
MGH-06	783	231	CB	Dead	-13.7
DFCI-25	600	443	CB	Dead	N/A
MGH-11	462	183	CB	Alive	N/A
DFCI-30	454	356	CB	Alive	N/A
DFCI-31	311	196	CB	Dead	N/A
MGH-12	756	166	NCB, but LTS	Dead	N/A
MGH-18	721	118	NCB, but LTS	Dead	-23.7
422	720	84	NCB, but LTS	Alive	N/A
62	655	174	NCB, but LTS	Dead	N/A
MGH-16	635	131	NCB, but LTS	Dead	N/A
MGH-05	588	159	NCB, but LTS	Dead	N/A
MGH-08	558	126	NCB, but LTS	Dead	N/A
208	521	79	NCB, but LTS	Dead	N/A
148	420	162	NCB, but LTS	Dead	-6.9
39	208	208	NCB	Dead	44.1
DFCI-17	104	47	NCB	Dead	N/A
27	90	90	NCB	Dead	26.9
42	61	43	NCB	Dead	31.2
DFCI-24	29	29	NCB	Dead	N/A
DFCI-18	26	19	NCB	Dead	N/A
CB = OS>360d + PFS>180d
NCB, but LTS = OS>360d + PFS<180d
NCB = OS<360d
