# Supplementary material for: Ex Vivo Profiling of PD-1 Blockade Using Organotypic Tumor Spheroids
Source: Oxford University Press journal article supplement (doi:10.1158/2159-8290.cd-17-0833), 2017-11-03
Supplement: 21598290cd170833-sup-186804_2_supp_4355520_hyg2hk.xlsx [file 21598290cd170833-sup-186804_2_supp_4355520_hyg2hk.xlsx]

## Sheet: S1_MC38 MDOTS correlation
Table S1
MC38 Immune Profiling - Tumor vs. S1/S2/S3
Pearson's correlation using all 21 markers
		Tumor	Tumor	Tumor	Tumor	Tumor	S1	S1	S1	S1	S1	S1	S2	S2	S2	S2	S2	S2	S3	S3	S3	S3	S3	S3
		1	2	4	5	6	1	2	3	4	5	6	1	2	3	4	5	6	1	2	3	4	5	6
Tumor	1	1	0.95521	0.890217	0.752203	0.240228	0.851971	0.975414	0.948208	0.838011	0.558336	0.460744	0.748963	0.947907	0.880526	0.680328	0.307645	0.18273	0.739889	0.826508	0.789923	0.6846	0.299749	0.226472
Tumor	2	0.95521	1	0.834693	0.712266	0.222902	0.900243	0.962591	0.967475	0.821493	0.548524	0.469579	0.788416	0.936001	0.883276	0.650658	0.309896	0.225963	0.776206	0.856018	0.816741	0.674575	0.278405	0.245601
Tumor	4	0.890217	0.834693	1	0.906546	0.494732	0.619376	0.852401	0.756321	0.914729	0.70815	0.55422	0.603076	0.86467	0.696011	0.83634	0.539809	0.383309	0.569065	0.663601	0.547613	0.791781	0.51775	0.430488
Tumor	5	0.752203	0.712266	0.906546	1	0.757605	0.554978	0.698617	0.610746	0.910668	0.802274	0.690896	0.634795	0.815877	0.634394	0.924558	0.712686	0.590121	0.635695	0.687682	0.510403	0.83916	0.567158	0.499444
Tumor	6	0.240228	0.222902	0.494732	0.757605	1	0.196652	0.128988	0.0868929	0.676199	0.859697	0.833603	0.45515	0.3668	0.229526	0.824833	0.924734	0.883655	0.459315	0.406873	0.164712	0.767733	0.792637	0.765797
S1	1	0.851971	0.900243	0.619376	0.554978	0.196652	1	0.854153	0.931649	0.744736	0.546039	0.553302	0.907511	0.862126	0.914967	0.589863	0.289682	0.247744	0.907516	0.93745	0.921068	0.662977	0.283	0.261377
S1	2	0.975414	0.962591	0.852401	0.698617	0.128988	0.854153	1	0.963259	0.775958	0.464667	0.371197	0.692433	0.936884	0.84892	0.597699	0.19119	0.0805152	0.685157	0.80757	0.764483	0.605104	0.178496	0.112384
S1	3	0.948208	0.967475	0.756321	0.610746	0.0868929	0.931649	0.963259	1	0.736853	0.447105	0.398505	0.777705	0.905797	0.927278	0.546953	0.153912	0.0566242	0.77635	0.843919	0.887882	0.579864	0.165948	0.101274
S1	4	0.838011	0.821493	0.914729	0.910668	0.676199	0.744736	0.775958	0.736853	1	0.896678	0.803016	0.800129	0.862849	0.742323	0.957476	0.74915	0.640254	0.767212	0.80807	0.642437	0.959342	0.720067	0.665037
S1	5	0.558336	0.548524	0.70815	0.802274	0.859697	0.546039	0.464667	0.447105	0.896678	1	0.966553	0.677085	0.605265	0.493385	0.928335	0.890023	0.821891	0.654117	0.649361	0.427758	0.958124	0.910922	0.845429
S1	6	0.460744	0.469579	0.55422	0.690896	0.833603	0.553302	0.371197	0.398505	0.803016	0.966553	1	0.67223	0.513701	0.459614	0.834787	0.825464	0.79008	0.665579	0.633841	0.437088	0.888863	0.866674	0.79448
S2	1	0.748963	0.788416	0.603076	0.634795	0.45515	0.907511	0.692433	0.777705	0.800129	0.677085	0.67223	1	0.833443	0.89838	0.735219	0.566962	0.52694	0.983954	0.944941	0.892766	0.779238	0.485017	0.509872
S2	2	0.947907	0.936001	0.86467	0.815877	0.3668	0.862126	0.936884	0.905797	0.862849	0.605265	0.513701	0.833443	1	0.900642	0.750938	0.424547	0.322903	0.835024	0.920419	0.816041	0.741384	0.326984	0.298046
S2	3	0.880526	0.883276	0.696011	0.634394	0.229526	0.914967	0.84892	0.927278	0.742323	0.493385	0.459614	0.89838	0.900642	1	0.616105	0.289769	0.184062	0.900765	0.889647	0.97643	0.625031	0.243146	0.200933
S2	4	0.680328	0.650658	0.83634	0.924558	0.824833	0.589863	0.597699	0.546953	0.957476	0.928335	0.834787	0.735219	0.750938	0.616105	1	0.871732	0.767124	0.706538	0.71678	0.517168	0.96995	0.791707	0.74658
S2	5	0.307645	0.309896	0.539809	0.712686	0.924734	0.289682	0.19119	0.153912	0.74915	0.890023	0.825464	0.566962	0.424547	0.289769	0.871732	1	0.97029	0.528526	0.481097	0.216913	0.86237	0.894058	0.929013
S2	6	0.18273	0.225963	0.383309	0.590121	0.883655	0.247744	0.0805152	0.0566242	0.640254	0.821891	0.79008	0.52694	0.322903	0.184062	0.767124	0.97029	1	0.49293	0.443241	0.139133	0.781594	0.835838	0.919935
S3	1	0.739889	0.776206	0.569065	0.635695	0.459315	0.907516	0.685157	0.77635	0.767212	0.654117	0.665579	0.983954	0.835024	0.900765	0.706538	0.528526	0.49293	1	0.960131	0.912945	0.746096	0.426242	0.440418
S3	2	0.826508	0.856018	0.663601	0.687682	0.406873	0.93745	0.80757	0.843919	0.80807	0.649361	0.633841	0.944941	0.920419	0.889647	0.71678	0.481097	0.443241	0.960131	1	0.873859	0.762644	0.387225	0.393971
S3	3	0.789923	0.816741	0.547613	0.510403	0.164712	0.921068	0.764483	0.887882	0.642437	0.427758	0.437088	0.892766	0.816041	0.97643	0.517168	0.216913	0.139133	0.912945	0.873859	1	0.549558	0.180577	0.145894
S3	4	0.6846	0.674575	0.791781	0.83916	0.767733	0.662977	0.605104	0.579864	0.959342	0.958124	0.888863	0.779238	0.741384	0.625031	0.96995	0.86237	0.781594	0.746096	0.762644	0.549558	1	0.848982	0.812333
S3	5	0.299749	0.278405	0.51775	0.567158	0.792637	0.283	0.178496	0.165948	0.720067	0.910922	0.866674	0.485017	0.326984	0.243146	0.791707	0.894058	0.835838	0.426242	0.387225	0.180577	0.848982	1	0.95543
S3	6	0.226472	0.245601	0.430488	0.499444	0.765797	0.261377	0.112384	0.101274	0.665037	0.845429	0.79448	0.509872	0.298046	0.200933	0.74658	0.929013	0.919935	0.440418	0.393971	0.145894	0.812333	0.95543	1
