# Supplementary material for: Ex Vivo Profiling of PD-1 Blockade Using Organotypic Tumor Spheroids
Source: Oxford University Press journal article supplement (doi:10.1158/2159-8290.cd-17-0833), 2017-11-03
Supplement: 21598290cd170833-sup-186804_2_supp_4355523_7yg27l.xlsx [file 21598290cd170833-sup-186804_2_supp_4355523_7yg27l.xlsx]

## Sheet: Table S2a_Quick Export
Table S2a
Project #	Compound Name	Compound Conc	ATP	Kinase	mutant	Technology	% Inhibition 1	% Inhibition 2	% Inhibition Avg	Dup Difference	Donor Interference	Acceptor Interference	Z'	Kinase Part# / Lot#	Dev Reaction Interference	Technology	ATP	IC50 (nM)	Hillslope	R2	fold selectivity (TBK1)	fold selectivity (IKBKE)
SSBK10488_30712	Cmpd1	1000	Km app	TBK1		ZLYTE	91	99	95	8	Pass	Pass	0.83	PV3504/857011	Pass	ZLYTE	Km app	1.04	1.12	0.9966	1	0.186047
SSBK10488_30712	Cmpd1	1000		CDC7/DBF4		LanthaScreen Binding	100	97	98	3	Pass	Pass	0.84	PV6274/1576890		LanthaScreen Binding		2.71	0.8	0.9917	2.60577	0.484794
SSBK10488_30712	Cmpd1	1000		MAPK15 (ERK7)		LanthaScreen Binding	100	100	100	0	Pass	Pass	0.93	PV6181/1570972		LanthaScreen Binding		4.35	1.27	0.9998	4.18269	0.778175
SSBK10488_30712	Cmpd1	1000	Km app	IKBKE (IKK epsilon)		ZLYTE	106	103	105	3	Pass	Pass	0.8	PV4875/853377	Pass	ZLYTE	Km app	5.59	1.06	0.9955	5.375	1
SSBK10488_30712	Cmpd1	1000	Km app	CSF1R (FMS)		ZLYTE	91	96	93	6	Pass	Pass	0.79	PV3249/662393	Pass	ZLYTE	Km app	14.2	0.55	0.9914	13.6538	2.54025
SSBK10488_30712	Cmpd1	1000		STK17A (DRAK1)		LanthaScreen Binding	101	101	101	0	Pass	Pass	0.9	PV3783/902537		LanthaScreen Binding		14.8	1.25	0.9989	14.2308	2.64758
SSBK10488_30712	Cmpd1	1000		TGFBR2		LanthaScreen Binding	92	95	93	3	Pass	Pass	0.79	PV6122/862447		LanthaScreen Binding		30.9	0.84	0.9797	29.7115	5.52773
SSBK10488_30712	Cmpd1	1000		PLK4		LanthaScreen Binding	96	95	96	1	Pass	Pass	0.96	PV6394/1577044		LanthaScreen Binding		31.5	0.88	0.9956	30.2885	5.63506
SSBK10488_30712	Cmpd1	1000	Km app	LRRK2		Adapta	99	100	100	1	Pass	Pass	0.76	PV4873/1106714		Adapta	Km app	34.9	0.99	0.9945	33.5577	6.24329
SSBK10488_30712	Cmpd1	1000	Km app	STK22D (TSSK1)		ZLYTE	99	95	97	3	Pass	Pass	0.88	PV3505/1211826	Pass	ZLYTE	Km app	35.1	1	0.9994	33.75	6.27907
SSBK10488_30712	Cmpd1	1000	Km app	PRKD2 (PKD2)		ZLYTE	99	97	98	2	Pass	Pass	0.8	PV3758/34015	Pass	ZLYTE	Km app	35.8	1.11	0.9993	34.4231	6.40429
SSBK10488_30712	Cmpd1	1000	Km app	MKNK1 (MNK1)		ZLYTE	99	100	100	1	Pass	Pass	0.77	PV6023/1405297	Pass	ZLYTE	Km app	41.5	1.49	0.9978	39.9038	7.42397
SSBK10488_30712	Cmpd1	1000	Km app	PRKD1 (PKC mu)		ZLYTE	100	95	98	5	Pass	Pass	0.86	PV3791/34226	Pass	ZLYTE	Km app	45.6	1.01	0.9981	43.8462	8.15742
SSBK10488_30712	Cmpd1	1000	Km app	MARK4		ZLYTE	96	93	95	3	Pass	Pass	0.8	PV3851/304213	Pass	ZLYTE	Km app	47.7	0.84	0.9995	45.8654	8.53309
SSBK10488_30712	Cmpd1	1000	Km app	MARK3		ZLYTE	98	94	96	4	Pass	Pass	0.73	PV4819/830446	Pass	ZLYTE	Km app	55	0.96	0.9993	52.8846	9.839
SSBK10488_30712	Cmpd1	1000	Km app	PAK4		ZLYTE	91	90	90	1	Pass	Pass	0.73	PV4212/35324	Pass	ZLYTE	Km app	59	0.69	0.9971	56.7308	10.5546
SSBK10488_30712	Cmpd1	1000		MLCK (MLCK2)		LanthaScreen Binding	92	93	93	0	Pass	Pass	0.56	PV3835/34028		LanthaScreen Binding		74.1	1	0.9972	71.25	13.2558
SSBK10488_30712	Cmpd1	1000		ULK3		LanthaScreen Binding	101	104	102	3	Pass	Pass	0.82	PV6436/1579414		LanthaScreen Binding		78.7	0.86	0.9971	75.6731	14.0787
SSBK10488_30712	Cmpd1	1000	Km app	IRAK1		Adapta	94	96	95	1	Pass	Pass	0.91	PV4403/880118		Adapta	Km app	80.6	1	0.9983	77.5	14.4186
SSBK10488_30712	Cmpd1	1000	Km app	BRSK1 (SAD1)		ZLYTE	92	89	90	4	Pass	Pass	0.91	PV4333/36097	Pass	ZLYTE	Km app	81.3	1.12	0.9991	78.1731	14.5438
SSBK10488_30712	Cmpd1	1000		SIK3		LanthaScreen Binding	98	95	96	2	Pass	Pass	0.73	PV6403/1577057		LanthaScreen Binding		81.6	1.42	0.9789	78.4615	14.5975
SSBK10488_30712	Cmpd1	1000	Km app	PRKCN (PKD3)		ZLYTE	98	96	97	2	Pass	Pass	0.74	PV3692/1252690	Pass	ZLYTE	Km app	90.9	1.11	0.9974	87.4038	16.2612
SSBK10488_30712	Cmpd1	1000		STK16 (PKL12)		LanthaScreen Binding	95	93	94	2	Pass	Pass	0.76	PV4311/36847		LanthaScreen Binding		104	1.22	0.997	100	18.6047
SSBK10488_30712	Cmpd1	1000		ULK2		LanthaScreen Binding	86	90	88	4	Pass	Pass	0.9	PV6433/1579413		LanthaScreen Binding		156	0.95	0.9986	150	27.907
SSBK10488_30712	Cmpd1	1000	Km app	LRRK2 G2019S	y	Adapta	99	100	100	1	Pass	Pass	0.88	PV4881/933637							0	0	dd
SSBK10488_30712	Cmpd1	1000	Km app	LRRK2 G2019S FL	y	Adapta	100	99	99	1	Pass	Pass	0.81	A15200PT/50078							0	0
SSBK10488_30712	Cmpd1	1000	Km app	LRRK2 I2020T	y	Adapta	100	98	99	2	Pass	Pass	0.84	PV5854/902533							0	0
SSBK10488_30712	Cmpd1	1000	Km app	LRRK2 FL		Adapta	98	98	98	0	Pass	Pass	0.88	A15197PT/1147693							0	0
SSBK10488_30712	Cmpd1	1000	Km app	LRRK2 R1441C	y	Adapta	99	95	97	4	Pass	Pass	0.8	PV5858/902531							0	0
SSBK10488_30712	Cmpd1	1000		KIT D816H	y	LanthaScreen Binding	90	94	92	4	Pass	Pass	0.82	PV6196/1570980							0	0
SSBK10488_30712	Cmpd1	1000		ULK1		LanthaScreen Binding	91	92	92	1	Pass	Pass	0.8	PV6430/1579415							0	0
SSBK10488_30712	Cmpd1	1000		ACVR1 (ALK2) R206H	y	LanthaScreen Binding	88	93	91	5	Pass	Pass	0.88	PV6232/1578464							0	0
SSBK10488_30712	Cmpd1	1000		KIT A829P	y	LanthaScreen Binding	91	90	90	0	Pass	Pass	0.89	PV6193/1570981							0	0
SSBK10488_30712	Cmpd1	1000	Km app	AURKA (Aurora A)		ZLYTE	91	86	89	5	Pass	Pass	0.84	PV3612/32155	Pass
SSBK10488_30712	Cmpd1	1000		EIF2AK2 (PKR)		LanthaScreen Binding	90	89	89	1	Pass	Pass	0.8	PV4821/374655
SSBK10488_30712	Cmpd1	1000		STK17B (DRAK2)		LanthaScreen Binding	94	84	89	10	Pass	Pass	0.6	PV6328/1575526
SSBK10488_30712	Cmpd1	1000		CLK4		LanthaScreen Binding	87	89	88	2	Pass	Pass	0.81	PV3839/827665
SSBK10488_30712	Cmpd1	1000	Km app	SNF1LK2		ZLYTE	88	88	88	0	Pass	Pass	0.66	PV4792/719848	Pass
SSBK10488_30712	Cmpd1	1000		MKNK2 (MNK2)		LanthaScreen Binding	86	88	87	2	Pass	Pass	0.86	PV5607/811381
SSBK10488_30712	Cmpd1	1000	Km app	MAP4K4 (HGK)		ZLYTE	86	86	86	0	Pass	Pass	0.74	PV3687/792773	Pass
SSBK10488_30712	Cmpd1	1000	Km app	MARK1 (MARK)		ZLYTE	85	87	86	3	Pass	Pass	0.89	PV4395/1081574	Pass
SSBK10488_30712	Cmpd1	1000	Km app	FYN		ZLYTE	85	85	85	0	Pass	Pass	0.7	P3042/1191778	Pass
SSBK10488_30712	Cmpd1	1000		RIPK2		LanthaScreen Binding	84	86	85	1	Pass	Pass	0.93	PV4213/35334
SSBK10488_30712	Cmpd1	1000		ACVR1 (ALK2)		LanthaScreen Binding	85	84	84	1	Pass	Pass	0.92	PV4877/676188
SSBK10488_30712	Cmpd1	1000	Km app	MARK2		ZLYTE	86	82	84	4	Pass	Pass	0.88	PV3878/877056	Pass
SSBK10488_30712	Cmpd1	1000		KIT D816V	y	LanthaScreen Binding	83	83	83	1	Pass	Pass	0.74	PV6199/1570986
SSBK10488_30712	Cmpd1	1000	Km app	NUAK1 (ARK5)		Adapta	83	83	83	0	Pass	Pass	0.83	PV4127/1401900
SSBK10488_30712	Cmpd1	1000	Km app	PDGFRA V561D	y	ZLYTE	85	81	83	4	Pass	Pass	0.84	PV4680/1113217	Pass
SSBK10488_30712	Cmpd1	1000		TLK2		LanthaScreen Binding	84	81	83	3	Pass	Pass	0.91	PV6424/1578677
SSBK10488_30712	Cmpd1	1000	Km app	FLT3 D835Y	y	ZLYTE	83	81	82	2	Pass	Pass	0.81	PV3967/308809	Pass
SSBK10488_30712	Cmpd1	1000	Km app	PHKG2		ZLYTE	83	79	81	4	Pass	Pass	0.85	PV4555/37321	Pass
SSBK10488_30712	Cmpd1	1000	Km app	PDK1 Direct		ZLYTE	85	74	79	11	Pass	Pass	0.71	P3001/1394674	Pass
SSBK10488_30712	Cmpd1	1000	Km app	CHEK1 (CHK1)		ZLYTE	78	78	78	1	Pass	Pass	0.74	P3040/28702	Pass
SSBK10488_30712	Cmpd1	1000		DMPK		LanthaScreen Binding	76	79	78	2	Pass	Pass	0.84	PV3784/802854
SSBK10488_30712	Cmpd1	1000	Km app	PAK7 (KIAA1264)		ZLYTE	77	79	78	2	Pass	Pass	0.84	PV4405/36846	Pass
SSBK10488_30712	Cmpd1	1000	Km app	PLK3		ZLYTE	80	76	78	5	Pass	Pass	0.8	PV3812/38812	Pass
SSBK10488_30712	Cmpd1	1000	Km app	PDGFRA D842V	y	ZLYTE	77	73	75	4	Pass	Pass	0.89	PV4203/269691	Pass
SSBK10488_30712	Cmpd1	1000	Km app	JAK3		ZLYTE	73	73	73	1	Pass	Pass	0.86	PV3855/1017963	Pass
SSBK10488_30712	Cmpd1	1000		CDK16 (PCTK1)/cyclin Y		LanthaScreen Binding	70	73	71	3	Pass	Pass	0.81	PV6379/1577049
SSBK10488_30712	Cmpd1	1000	Km app	MAP3K9 (MLK1)		ZLYTE	68	73	70	5	Pass	Pass	0.84	PV3787/1095726	Pass
SSBK10488_30712	Cmpd1	1000	Km app	NEK1		ZLYTE	68	70	69	3	Pass	Pass	0.82	PV4202/880120	Pass
SSBK10488_30712	Cmpd1	1000	Km app	RET V804L	y	ZLYTE	71	66	69	5	Pass	Pass	0.85	PV4397/36640	Pass
SSBK10488_30712	Cmpd1	1000	Km app	MINK1		ZLYTE	66	70	68	4	Pass	Pass	0.76	PV3810/1081579	Pass
SSBK10488_30712	Cmpd1	1000		ABL1 M351T	y	LanthaScreen Binding	65	69	67	4	Pass	Pass	0.67	PV6151/1570962
SSBK10488_30712	Cmpd1	1000	Km app	JAK2		ZLYTE	67	68	67	1	Pass	Pass	0.8	PV4210/784633	Pass
SSBK10488_30712	Cmpd1	1000		KIT N822K	y	LanthaScreen Binding	66	67	66	1	Pass	Pass	0.71	PV6310/1576886
SSBK10488_30712	Cmpd1	1000	Km app	TYK2		ZLYTE	65	64	64	1	Pass	Pass	0.88	PV4790/884908	Pass
SSBK10488_30712	Cmpd1	1000		FLT3 ITD		LanthaScreen Binding	64	62	63	2	Pass	Pass	0.72	PV6190/1570961
SSBK10488_30712	Cmpd1	1000	Km app	MYLK2 (skMLCK)		ZLYTE	65	60	63	5	Pass	Pass	0.67	PV3757/36606	Pass
SSBK10488_30712	Cmpd1	1000	100	BRAF V599E	y	ZLYTE	63	61	62	2	Pass	Pass	0.92	PV3849/910409	Pass
SSBK10488_30712	Cmpd1	1000	Km app	FLT4 (VEGFR3)		ZLYTE	64	60	62	5	Pass	Pass	0.87	PV4129/38454	Pass
SSBK10488_30712	Cmpd1	1000	Km app	PLK2		ZLYTE	60	64	62	4	Pass	Pass	0.9	PV4204/38798	Pass
SSBK10488_30712	Cmpd1	1000	Km app	ABL1 G250E	y	ZLYTE	60	61	60	1	Pass	Pass	0.9	PV3865/34529	Pass
SSBK10488_30712	Cmpd1	1000		ABL1 H396P	y	LanthaScreen Binding	58	60	59	2	Pass	Pass	0.74	PV6148/1570966
SSBK10488_30712	Cmpd1	1000		MAP3K10 (MLK2)		LanthaScreen Binding	58	60	59	2	Pass	Pass	0.96	PV3877/1138344
SSBK10488_30712	Cmpd1	1000		BMPR1B (ALK6)		LanthaScreen Binding	56	60	58	3	Pass	Pass	0.81	PV6235/1578462
SSBK10488_30712	Cmpd1	1000	Km app	CHUK (IKK alpha)		Adapta	65	50	58	15	Pass	Pass	0.79	PV4310/1110228
SSBK10488_30712	Cmpd1	1000		DDR2 T654M	y	LanthaScreen Binding	56	57	57	1	Pass	Pass	0.79	PV6175/1570973
SSBK10488_30712	Cmpd1	1000		MAP4K1 (HPK1)		LanthaScreen Binding	59	55	57	3	Pass	Pass	0.72	PV6355/1575528
SSBK10488_30712	Cmpd1	1000		MAPK8 (JNK1)		LanthaScreen Binding	57	56	57	1	Pass	Pass	0.83	PV3319/1354818
SSBK10488_30712	Cmpd1	1000	Km app	SRC N1		ZLYTE	54	60	57	6	Pass	Pass	0.91	P2904/21068	Pass
SSBK10488_30712	Cmpd1	1000		STK33		LanthaScreen Binding	59	55	57	4	Pass	Pass	0.91	PV4343/798867
SSBK10488_30712	Cmpd1	1000		TGFBR1 (ALK5)		LanthaScreen Binding	56	58	57	2	Pass	Pass	0.91	PV5837/562479
SSBK10488_30712	Cmpd1	1000		DAPK2		LanthaScreen Binding	60	53	56	7	Pass	Pass	0.64	PV3614/32159
SSBK10488_30712	Cmpd1	1000		SIK1		LanthaScreen Binding	57	54	56	2	Pass	Pass	0.93	PV6445/1601253
SSBK10488_30712	Cmpd1	1000	Km app	AMPK A1/B1/G1		ZLYTE	58	53	55	5	Pass	Pass	0.9	PV4672/1046028	Pass
SSBK10488_30712	Cmpd1	1000	Km app	ABL1 Y253F	y	ZLYTE	61	48	54	12	Pass	Pass	0.92	PV3863/34531	Pass
SSBK10488_30712	Cmpd1	1000		CDK14 (PFTK1)/cyclin Y		LanthaScreen Binding	56	51	54	5	Pass	Pass	0.56	PV6382/1577046
SSBK10488_30712	Cmpd1	1000		DYRK2		LanthaScreen Binding	54	53	54	1	Pass	Pass	0.57	PV6331/1578676
SSBK10488_30712	Cmpd1	1000	Km app	FGR		ZLYTE	53	53	53	0	Pass	Pass	0.94	P3041/26670	Pass
SSBK10488_30712	Cmpd1	1000		KIT Y823D	y	LanthaScreen Binding	47	59	53	12	Pass	Pass	0.67	PV6322/1579412
SSBK10488_30712	Cmpd1	1000	Km app	LYN B		ZLYTE	56	50	53	6	Pass	Pass	0.8	P2907/21076	Pass
SSBK10488_30712	Cmpd1	1000		NUAK2		LanthaScreen Binding	54	52	53	1	Pass	Pass	0.65	PV6376/1607389
SSBK10488_30712	Cmpd1	1000		TEK (TIE2) Y1108F	y	LanthaScreen Binding	53	52	53	0	Pass	Pass	0.6	PV6229/1570987
SSBK10488_30712	Cmpd1	1000	Km app	YES1		ZLYTE	55	51	53	4	Pass	Pass	0.84	A15557/50645	Pass
SSBK10488_30712	Cmpd1	1000		BRAF V599E	y	LanthaScreen Binding	50	53	52	3	Pass	Pass	0.89	PV3849/910409
SSBK10488_30712	Cmpd1	1000	Km app	JAK2 JH1 JH2 V617F		ZLYTE	54	50	52	4	Pass	Pass	0.84	PV4336/463344	Pass
SSBK10488_30712	Cmpd1	1000	Km app	KDR (VEGFR2)		ZLYTE	51	53	52	2	Pass	Pass	0.85	PV3660/1223246	Pass
SSBK10488_30712	Cmpd1	1000	Km app	ABL1 E255K	y	ZLYTE	53	50	51	3	Pass	Pass	0.79	PV3864/34528	Pass
SSBK10488_30712	Cmpd1	1000	Km app	AURKB (Aurora B)		ZLYTE	54	48	51	6	Pass	Pass	0.78	PV6130/857013	Pass
SSBK10488_30712	Cmpd1	1000		BMPR1A (ALK3)		LanthaScreen Binding	51	51	51	0	Pass	Pass	0.82	PV6038/670004
SSBK10488_30712	Cmpd1	1000	Km app	DAPK3 (ZIPK)		ZLYTE	52	49	51	3	Pass	Pass	0.68	PV3686/1083962	Pass
SSBK10488_30712	Cmpd1	1000		PKN2 (PRK2)		LanthaScreen Binding	51	52	51	2	Pass	Pass	0.93	PV3879/555959
SSBK10488_30712	Cmpd1	1000	Km app	RET Y791F	y	ZLYTE	57	43	50	14	Pass	Pass	0.91	PV4396/36639	Pass
SSBK10488_30712	Cmpd1	1000		STK38 (NDR)		LanthaScreen Binding	51	49	50	2	Pass	Pass	0.81	PV6370/1575531
SSBK10488_30712	Cmpd1	1000	Km app	ABL1		ZLYTE	48	51	49	4	Pass	Pass	0.88	P3049/1012910	Pass
SSBK10488_30712	Cmpd1	1000		BMPR2		LanthaScreen Binding	50	47	49	3	Pass	Pass	0.8	PV6256/1579470
SSBK10488_30712	Cmpd1	1000		MAPK10 (JNK3)		LanthaScreen Binding	48	49	49	1	Pass	Pass	0.93	PV4563/1075329
SSBK10488_30712	Cmpd1	1000	Km app	LYN A		ZLYTE	48	48	48	0	Pass	Pass	0.91	P2906/827663	Pass
SSBK10488_30712	Cmpd1	1000		KIT V559D T670I	y	LanthaScreen Binding	46	49	47	3	Pass	Pass	0.94	PV6316/1579472
SSBK10488_30712	Cmpd1	1000		MET D1228H	y	LanthaScreen Binding	46	48	47	2	Pass	Pass	0.78	PV6208/1570985
SSBK10488_30712	Cmpd1	1000		ABL1 Q252H	y	LanthaScreen Binding	52	41	46	11	Pass	Pass	0.76	PV6154/1570960
SSBK10488_30712	Cmpd1	1000		AMPK (A1/B2/G1)		LanthaScreen Binding	49	43	46	5	Pass	Pass	0.96	PV6244/1578463
SSBK10488_30712	Cmpd1	1000	Km app	AMPK A2/B1/G1		ZLYTE	47	46	46	2	Pass	Pass	0.93	PV4674/568101	Pass
SSBK10488_30712	Cmpd1	1000		BRAF		LanthaScreen Binding	44	47	46	2	Pass	Pass	0.89	PV3848/1258788
SSBK10488_30712	Cmpd1	1000	Km app	JAK2 JH1 JH2		ZLYTE	46	47	46	1	Pass	Pass	0.81	PV4393/311662	Pass
SSBK10488_30712	Cmpd1	1000	Km app	NEK9		ZLYTE	46	45	46	1	Pass	Pass	0.89	PV4653/38162	Pass
SSBK10488_30712	Cmpd1	1000	Km app	SYK		ZLYTE	44	49	46	5	Pass	Pass	0.85	PV3857/756818	Pass
SSBK10488_30712	Cmpd1	1000		AMPK (A2/B2/G2)		LanthaScreen Binding	44	45	45	1	Pass	Pass	0.93	PV6250/1578465
SSBK10488_30712	Cmpd1	1000	Km app	FLT3		ZLYTE	42	49	45	7	Pass	Pass	0.78	PV3182/1012909	Pass
SSBK10488_30712	Cmpd1	1000	Km app	IKBKB (IKK beta)		ZLYTE	52	39	45	13	Pass	Pass	0.9	PV3836/1445179	Pass
SSBK10488_30712	Cmpd1	1000	Km app	SRC		ZLYTE	45	44	45	1	Pass	Pass	0.89	P3044/1255538	Pass
SSBK10488_30712	Cmpd1	1000		TNIK		LanthaScreen Binding	46	43	45	3	Pass	Pass	0.8	PV6427/1578672
SSBK10488_30712	Cmpd1	1000	Km app	RET		ZLYTE	46	42	44	4	Pass	Pass	0.89	PV3819/853376	Pass
SSBK10488_30712	Cmpd1	1000		TAOK1		LanthaScreen Binding	45	43	44	2	Pass	Pass	0.82	PV6415/1576240
SSBK10488_30712	Cmpd1	1000	Km app	DAPK1		Adapta	42	43	43	2	Pass	Pass	0.83	PV3969/32654
SSBK10488_30712	Cmpd1	1000	Km app	PDGFRA (PDGFR alpha)		ZLYTE	43	43	43	0	Pass	Pass	0.82	PV3811/1269727	Pass
SSBK10488_30712	Cmpd1	1000	Km app	BLK		ZLYTE	41	42	42	1	Pass	Pass	0.8	PV3683/33635	Pass
SSBK10488_30712	Cmpd1	1000		CDK2/cyclin O		LanthaScreen Binding	39	42	41	4	Pass	Pass	0.75	PV6286/1576891
SSBK10488_30712	Cmpd1	1000		TEK (TIE2) R849W	y	LanthaScreen Binding	40	41	41	1	Pass	Pass	0.92	PV6226/1570990
SSBK10488_30712	Cmpd1	1000	Km app	TYRO3 (RSE)		ZLYTE	42	39	41	4	Pass	Pass	0.9	PV3828/682475	Pass
SSBK10488_30712	Cmpd1	1000	Km app	ABL2 (Arg)		ZLYTE	40	39	40	1	Pass	Pass	0.92	PV3266/850069	Pass
SSBK10488_30712	Cmpd1	1000		AMPK (A1/B1/G2)		LanthaScreen Binding	40	40	40	0	Pass	Pass	0.97	PV6238/1578461
SSBK10488_30712	Cmpd1	1000	Km app	LCK		ZLYTE	41	38	40	3	Pass	Pass	0.79	P3043/850070	Pass
SSBK10488_30712	Cmpd1	1000		LIMK1		LanthaScreen Binding	40	39	40	1	Pass	Pass	0.87	PV4337/367810
SSBK10488_30712	Cmpd1	1000		AMPK (A1/B1/G3)		LanthaScreen Binding	37	42	39	5	Pass	Pass	0.92	PV6241/1578466
SSBK10488_30712	Cmpd1	1000	Km app	MST1R (RON)		ZLYTE	38	38	38	0	Pass	Pass	0.83	PV4314/765277	Pass
SSBK10488_30712	Cmpd1	1000	Km app	PHKG1		ZLYTE	39	37	38	2	Pass	Pass	0.75	PV3853/830447	Pass
SSBK10488_30712	Cmpd1	1000	Km app	CDK2/cyclin A		ZLYTE	38	36	37	1	Pass	Pass	0.88	PV3267/924344	Pass
SSBK10488_30712	Cmpd1	1000		DDR2 N456S	y	LanthaScreen Binding	33	42	37	9	Pass	Pass	0.86	PV6172/1570968
SSBK10488_30712	Cmpd1	1000	Km app	RPS6KB1 (p70S6K)		ZLYTE	37	36	37	1	Pass	Pass	0.84	PV3815/38944	Pass
SSBK10488_30712	Cmpd1	1000		CDK2/cyclin A1		LanthaScreen Binding	33	39	36	6	Pass	Pass	0.89	PV6289/1576888
SSBK10488_30712	Cmpd1	1000	Km app	PDGFRA T674I	y	ZLYTE	40	32	36	8	Pass	Pass	0.67	PV3847/35891	Pass
SSBK10488_30712	Cmpd1	1000		ACVRL1 (ALK1)		LanthaScreen Binding	33	38	35	5	Pass	Pass	0.79	PV4883/511550
SSBK10488_30712	Cmpd1	1000		AMPK (A2/B2/G1)		LanthaScreen Binding	35	35	35	0	Pass	Pass	0.94	PV6247/1578460
SSBK10488_30712	Cmpd1	1000		FGFR3 K650M	y	LanthaScreen Binding	33	38	35	5	Pass	Pass	0.82	PV6187/1573650
SSBK10488_30712	Cmpd1	1000	Km app	ITK		ZLYTE	37	32	34	4	Pass	Pass	0.71	PV3875/1430640	Pass
SSBK10488_30712	Cmpd1	1000		STK38L (NDR2)		LanthaScreen Binding	30	38	34	9	Pass	Pass	0.54	PV6373/1575530
SSBK10488_30712	Cmpd1	1000	Km app	CLK1		ZLYTE	33	34	33	0	Pass	Pass	0.88	PV3315/943590	Pass
SSBK10488_30712	Cmpd1	1000	Km app	EPHB1		ZLYTE	34	31	33	3	Pass	Pass	0.91	PV3786/34225	Pass
SSBK10488_30712	Cmpd1	1000		RET V804M	y	LanthaScreen Binding	35	31	33	4	Pass	Pass	0.82	PV6223/1570988
SSBK10488_30712	Cmpd1	1000		TTK		LanthaScreen Binding	33	34	33	1	Pass	Pass	0.77	PV3792/558743
SSBK10488_30712	Cmpd1	1000	Km app	PDGFRB (PDGFR beta)		ZLYTE	34	30	32	4	Pass	Pass	0.78	P3082/27567	Pass
SSBK10488_30712	Cmpd1	1000		WEE1		LanthaScreen Binding	28	36	32	7	Pass	Pass	0.64	PV3817/784632
SSBK10488_30712	Cmpd1	1000	Km app	CSNK2A2 (CK2 alpha 2)		ZLYTE	32	30	31	2	Pass	Pass	0.81	PV3624/32653	Pass
SSBK10488_30712	Cmpd1	1000	Km app	EGFR (ErbB1) T790M L858R	y	ZLYTE	34	29	31	4	Pass	Pass	0.9	PV4879/1189155	Pass
SSBK10488_30712	Cmpd1	1000	Km app	MET (cMet)		ZLYTE	30	33	31	4	Pass	Pass	0.79	PV3143/625156	Pass
SSBK10488_30712	Cmpd1	1000	Km app	TXK		ZLYTE	27	36	31	9	Pass	Pass	0.86	PV5860/750657	Pass
SSBK10488_30712	Cmpd1	1000	Km app	MET M1250T	y	ZLYTE	26	34	30	8	Pass	Pass	0.86	PV3968/34718	Pass
SSBK10488_30712	Cmpd1	1000	Km app	NEK2		ZLYTE	29	30	30	0	Pass	Pass	0.81	PV3360/1086245	Pass
SSBK10488_30712	Cmpd1	1000		SLK		LanthaScreen Binding	29	32	30	4	Pass	Pass	0.95	PV3830/34390
SSBK10488_30712	Cmpd1	1000	Km app	ABL1 T315I	y	ZLYTE	30	29	29	1	Pass	Pass	0.84	PV3866/39639	Pass
SSBK10488_30712	Cmpd1	1000		ACVR2B		LanthaScreen Binding	27	31	29	4	Pass	Pass	0.86	PV6049/877066
SSBK10488_30712	Cmpd1	1000	Km app	DYRK1A		ZLYTE	30	27	28	4	Pass	Pass	0.9	PV3785/683159	Pass
SSBK10488_30712	Cmpd1	1000		NLK		LanthaScreen Binding	26	29	28	3	Pass	Pass	0.88	PV4309/35323
SSBK10488_30712	Cmpd1	1000	Km app	ROS1		ZLYTE	30	26	28	4	Pass	Pass	0.81	PV3814/479684	Pass
SSBK10488_30712	Cmpd1	1000		AXL R499C	y	LanthaScreen Binding	28	27	27	1	Pass	Pass	0.89	PV6253/1578673
SSBK10488_30712	Cmpd1	1000	Km app	CHEK2 (CHK2)		ZLYTE	27	27	27	0	Pass	Pass	0.84	PV3367/1033750	Pass
SSBK10488_30712	Cmpd1	1000	Km app	EPHA1		ZLYTE	29	24	27	5	Pass	Pass	0.85	PV3841/1138343	Pass
SSBK10488_30712	Cmpd1	1000	Km app	HCK		ZLYTE	26	28	27	2	Pass	Pass	0.87	PV6128/862448	Pass
SSBK10488_30712	Cmpd1	1000	Km app	SGK (SGK1)		ZLYTE	28	26	27	2	Pass	Pass	0.88	PV3818/1088196	Pass
SSBK10488_30712	Cmpd1	1000		CDK2/cyclin A2		LanthaScreen Binding	24	29	26	5	Pass	Pass	0.7	PV6292/1576892
SSBK10488_30712	Cmpd1	1000		MAP3K11 (MLK3)		LanthaScreen Binding	24	29	26	5	Pass	Pass	0.93	PV3788/869925
SSBK10488_30712	Cmpd1	1000		MERTK (cMER) A708S	y	LanthaScreen Binding	24	27	26	3	Pass	Pass	0.92	PV6325/1578675
SSBK10488_30712	Cmpd1	1000	Km app	PRKX		ZLYTE	22	30	26	8	Pass	Pass	0.87	PV3813/34283	Pass
SSBK10488_30712	Cmpd1	1000	Km app	DYRK3		ZLYTE	26	24	25	2	Pass	Pass	0.89	PV3837/290370	Pass
SSBK10488_30712	Cmpd1	1000	Km app	EGFR (ErbB1) T790M	y	ZLYTE	25	25	25	0	Pass	Pass	0.85	PV4803/1123633	Pass
SSBK10488_30712	Cmpd1	1000	100	MAPK8 (JNK1)		ZLYTE	33	18	25	15	Pass	Pass	0.79	PV3319/1354818	Pass
SSBK10488_30712	Cmpd1	1000		TNK2 (ACK)		LanthaScreen Binding	25	26	25	1	Pass	Pass	0.92	PV4807/407338
SSBK10488_30712	Cmpd1	1000	Km app	AXL		ZLYTE	22	25	24	3	Pass	Pass	0.86	PV3971/873922	Pass
SSBK10488_30712	Cmpd1	1000		LATS2		LanthaScreen Binding	23	25	24	1	Pass	Pass	0.91	PV6364/1575533
SSBK10488_30712	Cmpd1	1000	Km app	MERTK (cMER)		ZLYTE	27	22	24	5	Pass	Pass	0.82	PV3627/32658	Pass
SSBK10488_30712	Cmpd1	1000		PRKACG (PRKAC gamma)		LanthaScreen Binding	28	19	24	9	Pass	Pass	0.66	PV6391/1577047
SSBK10488_30712	Cmpd1	1000	Km app	AURKC (Aurora C)		ZLYTE	23	23	23	0	Pass	Pass	0.66	PV3856/1078206	Pass
SSBK10488_30712	Cmpd1	1000		FGFR1 V561M	y	LanthaScreen Binding	20	25	23	5	Pass	Pass	0.91	PV6343/1578678
SSBK10488_30712	Cmpd1	1000	Km app	MELK		ZLYTE	25	22	23	3	Pass	Pass	0.85	PV4823/819467	Pass
SSBK10488_30712	Cmpd1	1000	Km app	NEK4		ZLYTE	23	23	23	0	Pass	Pass	0.88	PV4315/924342	Pass
SSBK10488_30712	Cmpd1	1000		ACVR2A		LanthaScreen Binding	23	21	22	2	Pass	Pass	0.76	PV6124/862446
SSBK10488_30712	Cmpd1	1000		ICK		LanthaScreen Binding	22	22	22	0	Pass	Pass	0.86	PV6358/1577056
SSBK10488_30712	Cmpd1	1000		MAP3K14 (NIK)		LanthaScreen Binding	20	24	22	3	Pass	Pass	0.91	PV4902/1296958
SSBK10488_30712	Cmpd1	1000		MAP3K7/MAP3K7IP1 (TAK1-TAB1)		LanthaScreen Binding	22	22	22	0	Pass	Pass	0.89	PV4394/930475
SSBK10488_30712	Cmpd1	1000	Km app	GSK3A (GSK3 alpha)		ZLYTE	20	22	21	2	Pass	Pass	0.91	PV6126/862449	Pass
SSBK10488_30712	Cmpd1	1000	Km app	GSK3B (GSK3 beta)		ZLYTE	21	21	21	0	Pass	Pass	0.79	PV3365/371501	Pass
SSBK10488_30712	Cmpd1	1000	Km app	CDK9/cyclin T1		Adapta	18	22	20	4	Pass	Pass	0.88	PV4131/1370615
SSBK10488_30712	Cmpd1	1000	Km app	EPHA4		ZLYTE	18	21	20	2	Pass	Pass	0.9	PV3651/32933	Pass
SSBK10488_30712	Cmpd1	1000	Km app	HIPK2		ZLYTE	21	19	20	2	Pass	Pass	0.93	PV5275/452552	Pass
SSBK10488_30712	Cmpd1	1000	100	MAPK10 (JNK3)		ZLYTE	20	21	20	0	Pass	Pass	0.9	PV4563/1075329	Pass
SSBK10488_30712	Cmpd1	1000	Km app	CAMK2D (CaMKII delta)		ZLYTE	18	19	19	1	Pass	Pass	0.91	PV3373/31647	Pass
SSBK10488_30712	Cmpd1	1000		CAMK2G (CaMKII gamma)		LanthaScreen Binding	18	19	18	1	Pass	Pass	0.77	PV6268/1576884
SSBK10488_30712	Cmpd1	1000		FYN A		LanthaScreen Binding	16	21	18	6	Pass	Pass	0.81	PV6346/1575529
SSBK10488_30712	Cmpd1	1000		KIT D820E	y	LanthaScreen Binding	18	19	18	2	Pass	Pass	0.97	PV6307/1576885
SSBK10488_30712	Cmpd1	1000		MAP4K3 (GLK)		LanthaScreen Binding	16	21	18	6	Pass	Pass	0.87	PV6349/1579471
SSBK10488_30712	Cmpd1	1000		MYO3B (MYO3 beta)		LanthaScreen Binding	17	20	18	3	Pass	Pass	0.95	PV6367/1577055
SSBK10488_30712	Cmpd1	1000	Km app	NTRK1 (TRKA)		ZLYTE	16	20	18	3	Pass	Pass	0.73	PV3144/1347534	Pass
SSBK10488_30712	Cmpd1	1000	Km app	NTRK3 (TRKC)		ZLYTE	17	19	18	3	Pass	Pass	0.85	PV3617/708766	Pass
SSBK10488_30712	Cmpd1	1000		RAF1 (cRAF) Y340D Y341D	y	LanthaScreen Binding	15	20	18	4	Pass	Pass	0.91	PV3805/1293604
SSBK10488_30712	Cmpd1	1000		RET G691S	y	LanthaScreen Binding	19	18	18	1	Pass	Pass	0.8	PV6214/1570982
SSBK10488_30712	Cmpd1	1000		BRSK2		LanthaScreen Binding	16	17	17	1	Pass	Pass	0.87	PV6259/1576239
SSBK10488_30712	Cmpd1	1000		LIMK2		LanthaScreen Binding	14	19	17	5	Pass	Pass	0.95	PV3860/355434
SSBK10488_30712	Cmpd1	1000		PRKACB (PRKAC beta)		LanthaScreen Binding	16	18	17	2	Pass	Pass	0.82	PV6388/1577048
SSBK10488_30712	Cmpd1	1000	Km app	CDK1/cyclin B		ZLYTE	16	15	16	1	Pass	Pass	0.85	PV3292/873341	Pass
SSBK10488_30712	Cmpd1	1000		CDK2/cyclin E1		LanthaScreen Binding	15	17	16	2	Pass	Pass	0.66	PV6295/1576887
SSBK10488_30712	Cmpd1	1000	Km app	EPHB2		ZLYTE	14	17	16	3	Pass	Pass	0.91	PV3625/1386867	Pass
SSBK10488_30712	Cmpd1	1000	Km app	HIPK4		ZLYTE	18	14	16	4	Pass	Pass	0.89	PV3852/719847	Pass
SSBK10488_30712	Cmpd1	1000	100	MAPK9 (JNK2)		ZLYTE	12	21	16	9	Pass	Pass	0.73	PV3620/32388	Pass
SSBK10488_30712	Cmpd1	1000	Km app	PIK3CD/PIK3R1 (p110 delta/p85 alpha)		Adapta	22	9	16	12	Pass	Pass	0.88	PV5273/1147693
SSBK10488_30712	Cmpd1	1000	Km app	RPS6KA6 (RSK4)		ZLYTE	14	17	16	3	Pass	Pass	0.63	PV4557/37496	Pass
SSBK10488_30712	Cmpd1	1000	Km app	CDK7/cyclin H/MNAT1		Adapta	17	14	15	2	Pass	Pass	0.8	PV3868/1427412
SSBK10488_30712	Cmpd1	1000	Km app	EPHB4		ZLYTE	15	14	15	2	Pass	Pass	0.73	PV3251/29241	Pass
SSBK10488_30712	Cmpd1	1000	100	MAP3K8 (COT)		ZLYTE	19	11	15	7	Pass	Pass	0.89	PV4313/1111069	Pass
SSBK10488_30712	Cmpd1	1000	100	PDK1		ZLYTE	14	16	15	1	Pass	Pass	0.81	P3001/1394674	Pass
SSBK10488_30712	Cmpd1	1000	Km app	RPS6KA2 (RSK3)		ZLYTE	17	13	15	4	Pass	Pass	0.89	PV3846/34468	Pass
SSBK10488_30712	Cmpd1	1000		TLK1		LanthaScreen Binding	13	17	15	4	Pass	Pass	0.88	PV6421/1576241
SSBK10488_30712	Cmpd1	1000		EGFR (ErbB1) d746-750	y	LanthaScreen Binding	14	13	14	1	Pass	Pass	0.78	PV6178/1570967
SSBK10488_30712	Cmpd1	1000		EPHA6		LanthaScreen Binding	9	20	14	11	Pass	Pass	0.63	PV6337/1575527
SSBK10488_30712	Cmpd1	1000	Km app	PRKG2 (PKG2)		ZLYTE	16	13	14	3	Pass	Pass	0.87	PV3973/273926	Pass
SSBK10488_30712	Cmpd1	1000	Km app	RPS6KA3 (RSK2)		ZLYTE	17	10	14	7	Pass	Pass	0.83	PV3323/1361669	Pass
SSBK10488_30712	Cmpd1	1000	Km app	TEK (Tie2)		ZLYTE	11	17	14	6	Pass	Pass	0.59	PV3628/34398	Pass
SSBK10488_30712	Cmpd1	1000		ALK F1174L	y	LanthaScreen Binding	12	14	13	2	Pass	Pass	0.91	PV6160/1570964
SSBK10488_30712	Cmpd1	1000	Km app	HIPK3 (YAK1)		ZLYTE	15	11	13	4	Pass	Pass	0.92	PV4209/1076022	Pass
SSBK10488_30712	Cmpd1	1000		MAPK9 (JNK2)		LanthaScreen Binding	12	14	13	3	Pass	Pass	0.91	PV3620/32388
SSBK10488_30712	Cmpd1	1000	Km app	ROCK2		ZLYTE	12	14	13	2	Pass	Pass	0.74	PV3759/843703	Pass
SSBK10488_30712	Cmpd1	1000	Km app	RPS6KA1 (RSK1)		ZLYTE	15	11	13	4	Pass	Pass	0.83	PV3680/880119	Pass
SSBK10488_30712	Cmpd1	1000	Km app	STK22B (TSSK2)		ZLYTE	12	14	13	1	Pass	Pass	0.79	PV3622/32396	Pass
SSBK10488_30712	Cmpd1	1000	Km app	BMX		ZLYTE	12	13	12	1	Pass	Pass	0.89	PV3371/953336	Pass
SSBK10488_30712	Cmpd1	1000	Km app	CAMK1D (CaMKI delta)		ZLYTE	12	13	12	1	Pass	Pass	0.85	PV3663/1042984	Pass
SSBK10488_30712	Cmpd1	1000	Km app	CSK		ZLYTE	13	10	12	2	Pass	Pass	0.88	P2927/1205898	Pass
SSBK10488_30712	Cmpd1	1000	Km app	FGFR2		ZLYTE	12	11	12	1	Pass	Pass	0.93	PV3368/31517	Pass
SSBK10488_30712	Cmpd1	1000	Km app	FRK (PTK5)		ZLYTE	11	13	12	2	Pass	Pass	0.84	PV3874/34553	Pass
SSBK10488_30712	Cmpd1	1000	Km app	HIPK1 (Myak)		ZLYTE	11	13	12	1	Pass	Pass	0.89	PV4561/1126221	Pass
SSBK10488_30712	Cmpd1	1000		MAP3K3 (MEKK3)		LanthaScreen Binding	10	13	12	3	Pass	Pass	0.79	PV3876/702480
SSBK10488_30712	Cmpd1	1000	Km app	MAP4K5 (KHS1)		ZLYTE	11	12	12	0	Pass	Pass	0.65	PV3682/1383139	Pass
SSBK10488_30712	Cmpd1	1000	Km app	MUSK		ZLYTE	15	8	12	7	Pass	Pass	0.67	PV3834/1217900	Pass
SSBK10488_30712	Cmpd1	1000		RET M918T	y	LanthaScreen Binding	10	13	12	3	Pass	Pass	0.64	PV6217/1570989
SSBK10488_30712	Cmpd1	1000	Km app	DYRK1B		ZLYTE	14	9	11	5	Pass	Pass	0.91	PV4649/877059	Pass
SSBK10488_30712	Cmpd1	1000		EPHA7		LanthaScreen Binding	10	12	11	2	Pass	Pass	0.62	PV3689/33790
SSBK10488_30712	Cmpd1	1000	Km app	PLK1		ZLYTE	12	9	11	3	Pass	Pass	0.89	PV3501/39441	Pass
SSBK10488_30712	Cmpd1	1000	Km app	CAMK2B (CaMKII beta)		ZLYTE	11	8	10	3	Pass	Pass	0.81	PV4205/35330	Pass
SSBK10488_30712	Cmpd1	1000	Km app	CDC42 BPB (MRCKB)		ZLYTE	6	13	10	7	Pass	Pass	0.88	PV4399/36845	Pass
SSBK10488_30712	Cmpd1	1000		CDK9 (Inactive)		LanthaScreen Binding	8	13	10	5	Pass	Pass	0.93	PV6304/1579469
SSBK10488_30712	Cmpd1	1000		CDK9/cyclin K		LanthaScreen Binding	11	9	10	2	Pass	Pass	0.74	PV4335/35774
SSBK10488_30712	Cmpd1	1000	Km app	CSNK2A1 (CK2 alpha 1)		ZLYTE	13	7	10	7	Pass	Pass	0.73	PV3248/1240448	Pass
SSBK10488_30712	Cmpd1	1000	Km app	JAK1		ZLYTE	11	10	10	2	Pass	Pass	0.62	PV4774/1240449	Pass
SSBK10488_30712	Cmpd1	1000		MAP3K2 (MEKK2)		LanthaScreen Binding	11	9	10	2	Pass	Pass	0.75	PV3822/1171755
SSBK10488_30712	Cmpd1	1000	Km app	PRKCB2 (PKC beta II)		ZLYTE	12	8	10	4	Pass	Pass	0.82	P2251/930444	Pass
SSBK10488_30712	Cmpd1	1000	Km app	PRKCH (PKC eta)		ZLYTE	12	8	10	4	Pass	Pass	0.62	P2633/25587	Pass
SSBK10488_30712	Cmpd1	1000	Km app	ROCK1		ZLYTE	6	14	10	8	Pass	Pass	0.78	PV3691/37178	Pass
SSBK10488_30712	Cmpd1	1000	Km app	SGK2		ZLYTE	7	12	10	5	Pass	Pass	0.78	PV3858/1099019	Pass
SSBK10488_30712	Cmpd1	1000		STK39 (STLK3)		LanthaScreen Binding	10	9	10	1	Pass	Pass	0.54	PV6412/1608283
SSBK10488_30712	Cmpd1	1000		ALK C1156Y	y	LanthaScreen Binding	7	12	9	5	Pass	Pass	0.98	PV6157/1570963
SSBK10488_30712	Cmpd1	1000	Km app	EGFR (ErbB1)		ZLYTE	10	9	9	2	Pass	Pass	0.89	PV3872/1004026	Pass
SSBK10488_30712	Cmpd1	1000	Km app	EPHA8		ZLYTE	11	7	9	4	Pass	Pass	0.81	PV3844/36870	Pass
SSBK10488_30712	Cmpd1	1000		KIT V654A	y	LanthaScreen Binding	7	10	9	3	Pass	Pass	0.82	PV4132/35129
SSBK10488_30712	Cmpd1	1000	100	MAP2K6 (MKK6)		ZLYTE	0	19	9	19	Pass	Pass	0.85	PV3318/884909	Pass
SSBK10488_30712	Cmpd1	1000	Km app	NEK6		ZLYTE	12	6	9	7	Pass	Pass	0.76	PV3353/30778	Pass
SSBK10488_30712	Cmpd1	1000	Km app	PIK3CG (p110 gamma)		Adapta	11	8	9	3	Pass	Pass	0.92	PV4786/1153861
SSBK10488_30712	Cmpd1	1000		CAMKK2 (CaMKK beta)		LanthaScreen Binding	7	9	8	2	Pass	Pass	0.93	PV4206/35319
SSBK10488_30712	Cmpd1	1000		CASK		LanthaScreen Binding	6	10	8	4	Pass	Pass	0.75	PV6271/1576243
SSBK10488_30712	Cmpd1	1000	Km app	FES (FPS)		ZLYTE	9	7	8	2	Pass	Pass	0.84	PV3354/35734	Pass
SSBK10488_30712	Cmpd1	1000		FGFR3 G697C	y	LanthaScreen Binding	13	4	8	9	Pass	Pass	0.74	PV6184/1570969
SSBK10488_30712	Cmpd1	1000	Km app	FGFR3 K650E	y	ZLYTE	11	6	8	5	Pass	Pass	0.85	PV4392/36445	Pass
SSBK10488_30712	Cmpd1	1000		MAP2K1 (MEK1) S218D S222D	y	LanthaScreen Binding	10	7	8	2	Pass	Pass	0.92	P3099/38541
SSBK10488_30712	Cmpd1	1000	100	MAP2K2 (MEK2)		ZLYTE	13	2	8	10	Pass	Pass	0.92	PV3615/32519	Pass
SSBK10488_30712	Cmpd1	1000	Km app	MAPK13 (p38 delta)		ZLYTE	7	9	8	2	Pass	Pass	0.83	PV3656/36817	Pass
SSBK10488_30712	Cmpd1	1000	Km app	PAK1		ZLYTE	8	8	8	0	Pass	Pass	0.86	PV3820/35463	Pass
SSBK10488_30712	Cmpd1	1000		ZAK		LanthaScreen Binding	6	10	8	4	Pass	Pass	0.92	PV3882/34603
SSBK10488_30712	Cmpd1	1000	10	CAMK1 (CaMK1)		Adapta	7	8	7	1	Pass	Pass	0.86	PV4391/36046
SSBK10488_30712	Cmpd1	1000		CDK1/cyclin A2		LanthaScreen Binding	2	12	7	11	Pass	Pass	0.73	PV6280/1579468
SSBK10488_30712	Cmpd1	1000	Km app	CLK2		ZLYTE	5	9	7	4	Pass	Pass	0.81	PV4201/873335	Pass
SSBK10488_30712	Cmpd1	1000	Km app	DCAMKL2 (DCK2)		ZLYTE	11	3	7	8	Pass	Pass	0.63	PV4297/869931	Pass
SSBK10488_30712	Cmpd1	1000	Km app	FER		ZLYTE	4	9	7	5	Pass	Pass	0.71	PV3806/38946	Pass
SSBK10488_30712	Cmpd1	1000	Km app	FRAP1 (mTOR)		ZLYTE	2	12	7	10	Pass	Pass	0.8	PV4753/873345	Pass
SSBK10488_30712	Cmpd1	1000		MAP2K3 (MEK3)		LanthaScreen Binding	5	8	7	4	Pass	Pass	0.61	PV3662/357368
SSBK10488_30712	Cmpd1	1000		MAP3K5 (ASK1)		LanthaScreen Binding	7	8	7	1	Pass	Pass	0.72	PV3809/666419
SSBK10488_30712	Cmpd1	1000	Km app	PIM1		ZLYTE	11	3	7	9	Pass	Pass	0.76	PV3503/811382	Pass
SSBK10488_30712	Cmpd1	1000		CDK3/cyclin E1		LanthaScreen Binding	2	9	6	7	Pass	Pass	0.62	PV6298/1579411
SSBK10488_30712	Cmpd1	1000	Km app	EPHA2		ZLYTE	1	12	6	12	Pass	Pass	0.77	PV3688/36904	Pass
SSBK10488_30712	Cmpd1	1000	Km app	ERBB4 (HER4)		ZLYTE	8	5	6	4	Pass	Pass	0.74	PV3626/32657	Pass
SSBK10488_30712	Cmpd1	1000	Km app	FLT1 (VEGFR1)		ZLYTE	7	4	6	3	Pass	Pass	0.81	PV3666/33924	Pass
SSBK10488_30712	Cmpd1	1000	Km app	IRAK4		ZLYTE	5	8	6	3	Pass	Pass	0.78	PV3362/1088346	Pass
SSBK10488_30712	Cmpd1	1000	Km app	KIT T670I	y	ZLYTE	6	7	6	2	Pass	Pass	0.71	PV3869/34504	Pass
SSBK10488_30712	Cmpd1	1000	Km app	LTK (TYK1)		ZLYTE	5	7	6	1	Pass	Pass	0.78	PV4651/768522	Pass
SSBK10488_30712	Cmpd1	1000	Km app	MAPK1 (ERK2)		ZLYTE	6	6	6	0	Pass	Pass	0.86	PV3313/904347	Pass
SSBK10488_30712	Cmpd1	1000	Km app	MAPKAPK5 (PRAK)		ZLYTE	6	7	6	1	Pass	Pass	0.78	PV3301/880117	Pass
SSBK10488_30712	Cmpd1	1000	Km app	NTRK2 (TRKB)		ZLYTE	5	7	6	1	Pass	Pass	0.93	PV3616/35706	Pass
SSBK10488_30712	Cmpd1	1000	Km app	PAK6		ZLYTE	9	4	6	5	Pass	Pass	0.8	PV3502/625425	Pass
SSBK10488_30712	Cmpd1	1000	Km app	PRKCI (PKC iota)		ZLYTE	5	7	6	2	Pass	Pass	0.77	PV3183/28662	Pass
SSBK10488_30712	Cmpd1	1000	Km app	PTK2B (FAK2)		ZLYTE	8	4	6	4	Pass	Pass	0.8	PV4567/883370	Pass
SSBK10488_30712	Cmpd1	1000		TESK2		LanthaScreen Binding	14	-3	6	16	Pass	Pass	0.74	PV6418/1576242
SSBK10488_30712	Cmpd1	1000	Km app	ADRBK1 (GRK2)		ZLYTE	3	7	5	4	Pass	Pass	0.88	PV3361/883372	Pass
SSBK10488_30712	Cmpd1	1000	Km app	ADRBK2 (GRK3)		ZLYTE	6	4	5	2	Pass	Pass	0.71	PV3827/38897	Pass
SSBK10488_30712	Cmpd1	1000		ALK L1196M	y	LanthaScreen Binding	1	9	5	8	Pass	Pass	0.92	PV6166/1570971
SSBK10488_30712	Cmpd1	1000	Km app	BTK		ZLYTE	3	6	5	3	Pass	Pass	0.89	PV3363/1405298	Pass
SSBK10488_30712	Cmpd1	1000	Km app	CDK5/p35		ZLYTE	7	2	5	5	Pass	Pass	0.89	PV3000/25348	Pass
SSBK10488_30712	Cmpd1	1000	Km app	EGFR (ErbB1) L861Q	y	ZLYTE	6	5	5	1	Pass	Pass	0.89	PV3873/34562	Pass
SSBK10488_30712	Cmpd1	1000	Km app	FGFR3		ZLYTE	6	4	5	2	Pass	Pass	0.84	PV3145/28459	Pass
SSBK10488_30712	Cmpd1	1000		GRK1		LanthaScreen Binding	7	2	5	5	Pass	Pass	0.96	PV6352/1577053
SSBK10488_30712	Cmpd1	1000	100	MAP2K1 (MEK1)		ZLYTE	7	3	5	4	Pass	Pass	0.82	PV3303/1081576	Pass
SSBK10488_30712	Cmpd1	1000		MAP2K1 (MEK1)		LanthaScreen Binding	6	5	5	1	Pass	Pass	0.95	PV3303/1081567
SSBK10488_30712	Cmpd1	1000		MAP2K2 (MEK2)		LanthaScreen Binding	5	5	5	0	Pass	Pass	0.94	PV3615/32519
SSBK10488_30712	Cmpd1	1000		MAP2K6 (MKK6) S207E T211E	y	LanthaScreen Binding	5	5	5	0	Pass	Pass	0.91	PV3293/877061
SSBK10488_30712	Cmpd1	1000	Km app	MAPK11 (p38 beta)		ZLYTE	6	4	5	2	Pass	Pass	0.85	PV3679/1131827	Pass
SSBK10488_30712	Cmpd1	1000	Km app	PAK3		ZLYTE	7	2	5	4	Pass	Pass	0.86	PV3789/34118	Pass
SSBK10488_30712	Cmpd1	1000	Km app	PI4KB (PI4K beta)		Adapta	7	3	5	4	Pass	Pass	0.95	PV5277/943589
SSBK10488_30712	Cmpd1	1000	Km app	STK3 (MST2)		ZLYTE	5	6	5	1	Pass	Pass	0.7	PV4805/371195	Pass
SSBK10488_30712	Cmpd1	1000		STK32B (YANK2)		LanthaScreen Binding	1	8	5	7	Pass	Pass	0.9	PV6406/1577058
SSBK10488_30712	Cmpd1	1000	Km app	TAOK2 (TAO1)		ZLYTE	3	6	5	3	Pass	Pass	0.8	PV3760/1011094	Pass
SSBK10488_30712	Cmpd1	1000		ALK R1275Q	y	LanthaScreen Binding	0	7	4	7	Pass	Pass	0.89	PV6169/1570970
SSBK10488_30712	Cmpd1	1000	Km app	CDC42 BPA (MRCKA)		ZLYTE	4	4	4	0	Pass	Pass	0.7	PV4398/1314130	Pass
SSBK10488_30712	Cmpd1	1000	Km app	EGFR (ErbB1) L858R	y	ZLYTE	6	3	4	3	Pass	Pass	0.72	PV4128/279551	Pass
SSBK10488_30712	Cmpd1	1000		EPHA3		LanthaScreen Binding	6	3	4	4	Pass	Pass	0.82	PV3359/673524
SSBK10488_30712	Cmpd1	1000	Km app	GRK7		ZLYTE	3	5	4	2	Pass	Pass	0.86	PV3823/34013	Pass
SSBK10488_30712	Cmpd1	1000	Km app	INSRR (IRR)		ZLYTE	5	4	4	1	Pass	Pass	0.91	PV3808/34272	Pass
SSBK10488_30712	Cmpd1	1000	100	MAPK14 (p38 alpha)		ZLYTE	-1	9	4	10	Pass	Pass	0.87	PV3304/1475037	Pass
SSBK10488_30712	Cmpd1	1000		MYLK (MLCK)		LanthaScreen Binding	5	3	4	2	Pass	Pass	0.91	PV4339/36152
SSBK10488_30712	Cmpd1	1000	Km app	PRKCB1 (PKC beta I)		ZLYTE	5	3	4	2	Pass	Pass	0.71	P2291/299686	Pass
SSBK10488_30712	Cmpd1	1000	100	RAF1 (cRAF) Y340D Y341D	y	ZLYTE	5	3	4	2	Pass	Pass	0.91	PV3805/1293604	Pass
SSBK10488_30712	Cmpd1	1000	Km app	RPS6KA5 (MSK1)		ZLYTE	6	3	4	2	Pass	Pass	0.84	PV3681/380935	Pass
SSBK10488_30712	Cmpd1	1000	Km app	SRMS (Srm)		ZLYTE	5	3	4	2	Pass	Pass	0.84	PV4214/1110226	Pass
SSBK10488_30712	Cmpd1	1000	Km app	ZAP70		ZLYTE	4	4	4	0	Pass	Pass	0.86	P2782/843705	Pass
SSBK10488_30712	Cmpd1	1000	Km app	AKT2 (PKB beta)		ZLYTE	3	2	3	1	Pass	Pass	0.81	PV3184/28770	Pass
SSBK10488_30712	Cmpd1	1000	Km app	EPHA5		ZLYTE	3	4	3	1	Pass	Pass	0.74	PV3840/34383	Pass
SSBK10488_30712	Cmpd1	1000	Km app	EPHB3		ZLYTE	3	3	3	0	Pass	Pass	0.94	PV3658/33066	Pass
SSBK10488_30712	Cmpd1	1000	Km app	FGFR4		ZLYTE	7	-2	3	9	Pass	Pass	0.65	P3054/26967	Pass
SSBK10488_30712	Cmpd1	1000	Km app	KIT		ZLYTE	1	5	3	4	Pass	Pass	0.76	P3081/1344384	Pass
SSBK10488_30712	Cmpd1	1000	Km app	MAPK12 (p38 gamma)		ZLYTE	4	3	3	1	Pass	Pass	0.87	PV3654/1140849	Pass
SSBK10488_30712	Cmpd1	1000	Km app	NEK7		ZLYTE	5	2	3	3	Pass	Pass	0.81	PV3833/34387	Pass
SSBK10488_30712	Cmpd1	1000	Km app	PAK2 (PAK65)		ZLYTE	6	-1	3	7	Pass	Pass	0.87	PV4565/924347	Pass
SSBK10488_30712	Cmpd1	1000	Km app	PIM2		ZLYTE	-1	7	3	7	Pass	Pass	0.76	PV3649/32930	Pass
SSBK10488_30712	Cmpd1	1000	Km app	PRKACA (PKA)		ZLYTE	4	1	3	3	Pass	Pass	0.8	P2912/37377	Pass
SSBK10488_30712	Cmpd1	1000	Km app	PRKG1		ZLYTE	2	5	3	3	Pass	Pass	0.9	PV4340/893283	Pass
SSBK10488_30712	Cmpd1	1000	Km app	SGKL (SGK3)		ZLYTE	3	4	3	1	Pass	Pass	0.87	PV3859/38954	Pass
SSBK10488_30712	Cmpd1	1000	Km app	AKT1 (PKB alpha)		ZLYTE	1	3	2	2	Pass	Pass	0.89	P2999/1159806	Pass
SSBK10488_30712	Cmpd1	1000	Km app	AKT3 (PKB gamma)		ZLYTE	3	1	2	2	Pass	Pass	0.88	PV3185/28771	Pass
SSBK10488_30712	Cmpd1	1000	Km app	CAMK2A (CaMKII alpha)		ZLYTE	4	0	2	4	Pass	Pass	0.89	PV3142/28192	Pass
SSBK10488_30712	Cmpd1	1000	Km app	CDK5/p25		ZLYTE	3	1	2	2	Pass	Pass	0.79	PV4676/907645	Pass
SSBK10488_30712	Cmpd1	1000	Km app	CLK3		ZLYTE	1	3	2	1	Pass	Pass	0.88	PV3826/939820	Pass
SSBK10488_30712	Cmpd1	1000		DDR1		LanthaScreen Binding	3	2	2	1	Pass	Pass	0.95	PV6047/693053
SSBK10488_30712	Cmpd1	1000	Km app	GRK6		ZLYTE	2	2	2	1	Pass	Pass	0.84	PV3661/37437	Pass
SSBK10488_30712	Cmpd1	1000		KIT T670E	y	LanthaScreen Binding	2	2	2	1	Pass	Pass	0.9	PV6313/1575536
SSBK10488_30712	Cmpd1	1000	Km app	MAP4K2 (GCK)		ZLYTE	6	-2	2	8	Pass	Pass	0.88	PV4211/748356	Pass
SSBK10488_30712	Cmpd1	1000	Km app	MATK (HYL)		ZLYTE	1	2	2	0	Pass	Pass	0.83	PV3370/31553	Pass
SSBK10488_30712	Cmpd1	1000	Km app	MST4		ZLYTE	2	3	2	0	Pass	Pass	0.76	PV3690/1205875	Pass
SSBK10488_30712	Cmpd1	1000	Km app	PASK		ZLYTE	3	1	2	2	Pass	Pass	0.68	PV3972/762487	Pass
SSBK10488_30712	Cmpd1	1000	Km app	STK23 (MSSK1)		ZLYTE	2	1	2	1	Pass	Pass	0.86	PV3880/1214750	Pass
SSBK10488_30712	Cmpd1	1000		TAOK3 (JIK)		LanthaScreen Binding	3	1	2	2	Pass	Pass	0.86	PV3652/32935
SSBK10488_30712	Cmpd1	1000	Km app	ALK		ZLYTE	4	-2	1	5	Pass	Pass	0.86	PV3867/1542512	Pass
SSBK10488_30712	Cmpd1	1000		CDK8/cyclin C		LanthaScreen Binding	0	3	1	4	Pass	Pass	0.94	PV4402/1177216
SSBK10488_30712	Cmpd1	1000	Km app	CSNK1A1 (CK1 alpha 1)		ZLYTE	2	1	1	1	Pass	Pass	0.84	PV3850/1004025	Pass
SSBK10488_30712	Cmpd1	1000	Km app	CSNK1E (CK1 epsilon)		ZLYTE	-2	4	1	6	Pass	Pass	0.75	PV3500/866725	Pass
SSBK10488_30712	Cmpd1	1000	Km app	CSNK1G3 (CK1 gamma 3)		ZLYTE	4	-2	1	6	Pass	Pass	0.85	PV3838/1140848	Pass
SSBK10488_30712	Cmpd1	1000	Km app	IGF1R		ZLYTE	1	2	1	2	Pass	Pass	0.78	PV3250/924345	Pass
SSBK10488_30712	Cmpd1	1000		MAP2K6 (MKK6)		LanthaScreen Binding	-2	4	1	6	Pass	Pass	0.86	PV3318/884909
SSBK10488_30712	Cmpd1	1000	Km app	MAPK14 (p38 alpha) Direct		ZLYTE	2	1	1	1	Pass	Pass	0.94	PV3304/1475037	Pass
SSBK10488_30712	Cmpd1	1000	Km app	PTK2 (FAK)		ZLYTE	0	2	1	2	Pass	Pass	0.79	PV3832/1378055	Pass
SSBK10488_30712	Cmpd1	1000	Km app	RPS6KA4 (MSK2)		ZLYTE	0	2	1	3	Pass	Pass	0.84	PV3782/990109	Pass
SSBK10488_30712	Cmpd1	1000	Km app	STK24 (MST3)		ZLYTE	-5	8	1	14	Pass	Pass	0.7	PV3650/32932	Pass
SSBK10488_30712	Cmpd1	1000		TEC		LanthaScreen Binding	0	2	1	2	Pass	Pass	0.93	PV3269/910411
SSBK10488_30712	Cmpd1	1000		WNK2		LanthaScreen Binding	-4	5	1	9	Pass	Pass	0.86	PV4341/35976
SSBK10488_30712	Cmpd1	1000		CAMKK1 (CAMKKA)		LanthaScreen Binding	2	-1	0	2	Pass	Pass	0.8	PV4670/406782
SSBK10488_30712	Cmpd1	1000		DDR2		LanthaScreen Binding	0	1	0	2	Pass	Pass	0.94	PV3870/916220
SSBK10488_30712	Cmpd1	1000	Km app	INSR		ZLYTE	-1	1	0	3	Pass	Pass	0.81	PV3781/1314127	Pass
SSBK10488_30712	Cmpd1	1000	Km app	MAPK3 (ERK1)		ZLYTE	3	-2	0	5	Pass	Pass	0.86	PV3311/1255534	Pass
SSBK10488_30712	Cmpd1	1000	Km app	MAPKAPK2		ZLYTE	0	-1	0	1	Pass	Pass	0.82	PV3317/36559	Pass
SSBK10488_30712	Cmpd1	1000	10	PI4KA (PI4K alpha)		Adapta	3	-3	0	6	Pass	Pass	0.81	PV5689/1131829
SSBK10488_30712	Cmpd1	1000	Km app	PRKCD (PKC delta)		ZLYTE	4	-4	0	8	Pass	Pass	0.73	P2293/39038	Pass
SSBK10488_30712	Cmpd1	1000		RIPK3		LanthaScreen Binding	-1	1	0	2	Pass	Pass	0.84	PV6397/1610742
SSBK10488_30712	Cmpd1	1000	Km app	SPHK1		Adapta	10	-9	0	19	Pass	Pass	0.77	PV5214/933639
SSBK10488_30712	Cmpd1	1000	Km app	STK4 (MST1)		ZLYTE	0	0	0	0	Pass	Pass	0.73	PV3854/38395	Pass
SSBK10488_30712	Cmpd1	1000		CDK5 (Inactive)		LanthaScreen Binding	1	-2	-1	3	Pass	Pass	0.68	PV6301/1576893
SSBK10488_30712	Cmpd1	1000	Km app	DNA-PK		ZLYTE	2	-4	-1	7	Pass	Pass	0.69	PV5864/1594760	Pass
SSBK10488_30712	Cmpd1	1000	Km app	DYRK4		ZLYTE	-2	0	-1	1	Pass	Pass	0.82	PV3871/37361	Pass
SSBK10488_30712	Cmpd1	1000	Km app	EEF2K		ZLYTE	-1	0	-1	1	Pass	Pass	0.87	PV4559/1075327	Pass
SSBK10488_30712	Cmpd1	1000	Km app	ERBB2 (HER2)		ZLYTE	0	-3	-1	3	Pass	Pass	0.74	PV3366/1185123	Pass
SSBK10488_30712	Cmpd1	1000	Km app	PTK6 (Brk)		ZLYTE	-1	-1	-1	0	Pass	Pass	0.86	PV3291/1205876	Pass
SSBK10488_30712	Cmpd1	1000		STK32C (YANK3)		LanthaScreen Binding	-4	3	-1	6	Pass	Pass	0.68	PV6409/1577045
SSBK10488_30712	Cmpd1	1000	Km app	CAMK4 (CaMKIV)		ZLYTE	-2	-2	-2	0	Pass	Pass	0.84	PV3310/1103512	Pass
SSBK10488_30712	Cmpd1	1000		LATS1		LanthaScreen Binding	-5	1	-2	6	Pass	Pass	0.62	PV6361/1575532
SSBK10488_30712	Cmpd1	1000	10	PIK3C2B (PI3K-C2 beta)		Adapta	3	-7	-2	9	Pass	Pass	0.87	PV5374/1223244
SSBK10488_30712	Cmpd1	1000	Km app	PRKCA (PKC alpha)		ZLYTE	0	-5	-2	6	Pass	Pass	0.71	P2232/38479	Pass
SSBK10488_30712	Cmpd1	1000	Km app	SRPK1		ZLYTE	-1	-2	-2	2	Pass	Pass	0.94	PV4215/1182336	Pass
SSBK10488_30712	Cmpd1	1000	Km app	STK25 (YSK1)		ZLYTE	0	-4	-2	4	Pass	Pass	0.8	PV3657/33163	Pass
SSBK10488_30712	Cmpd1	1000		WNK3		LanthaScreen Binding	-3	0	-2	2	Pass	Pass	0.83	PV4342/36047
SSBK10488_30712	Cmpd1	1000	Km app	CSNK1D (CK1 delta)		ZLYTE	-1	-5	-3	5	Pass	Pass	0.83	PV3665/843704	Pass
SSBK10488_30712	Cmpd1	1000	Km app	FGFR1		ZLYTE	-5	-2	-3	3	Pass	Pass	0.8	PV3146/28427	Pass
SSBK10488_30712	Cmpd1	1000	Km app	GRK5		ZLYTE	5	-10	-3	15	Pass	Pass	0.82	PV3824/879275	Pass
SSBK10488_30712	Cmpd1	1000	Km app	MAPKAPK3		ZLYTE	1	-8	-3	9	Pass	Pass	0.86	PV3299/38895	Pass
SSBK10488_30712	Cmpd1	1000	Km app	PRKCE (PKC epsilon)		ZLYTE	1	-6	-3	8	Pass	Pass	0.83	P2292/37717	Pass
SSBK10488_30712	Cmpd1	1000	Km app	SRPK2		ZLYTE	-2	-4	-3	2	Pass	Pass	0.91	PV3829/900365	Pass
SSBK10488_30712	Cmpd1	1000		CDK11 (Inactive)		LanthaScreen Binding	-1	-7	-4	7	Pass	Pass	0.71	PV6283/1576889
SSBK10488_30712	Cmpd1	1000	Km app	GRK4		ZLYTE	-4	-5	-5	1	Pass	Pass	0.86	PV3807/618977	Pass
SSBK10488_30712	Cmpd1	1000	Km app	PIK3CA/PIK3R1 (p110 alpha/p85 alpha)		Adapta	-5	-4	-5	1	Pass	Pass	0.79	PV4788/616250
SSBK10488_30712	Cmpd1	1000	Km app	PKN1 (PRK1)		ZLYTE	-6	-4	-5	2	Pass	Pass	0.68	PV3790/356552	Pass
SSBK10488_30712	Cmpd1	1000	Km app	PRKCG (PKC gamma)		ZLYTE	-9	-1	-5	8	Pass	Pass	0.73	P2233/39126	Pass
SSBK10488_30712	Cmpd1	1000	Km app	CSNK1G1 (CK1 gamma 1)		ZLYTE	-14	2	-6	16	Pass	Pass	0.77	PV3825/34360	Pass
SSBK10488_30712	Cmpd1	1000	Km app	GSG2 (Haspin)		Adapta	7	-20	-6	26	Pass	Pass	0.71	PV5708/869949
SSBK10488_30712	Cmpd1	1000	Km app	ACVR1B (ALK4)		ZLYTE	-10	-4	-7	6	Pass	Pass	0.9	PV4312/919690	Pass
SSBK10488_30712	Cmpd1	1000	Km app	PIK3C3 (hVPS34)		Adapta	-5	-9	-7	4	Pass	Pass	0.91	PV5126/853378
SSBK10488_30712	Cmpd1	1000	Km app	PIK3C2A (PI3K-C2 alpha)		Adapta	-7	-9	-8	2	Pass	Pass	0.88	PV5586/1123632
SSBK10488_30712	Cmpd1	1000	10	SPHK2		Adapta	-16	-2	-9	14	Pass	Pass	0.56	PV5216/1296957
SSBK10488_30712	Cmpd1	1000	Km app	CSNK1G2 (CK1 gamma 2)		ZLYTE	-7	-16	-11	9	Pass	Pass	0.79	PV3499/1120155	Pass
SSBK10488_30712	Cmpd1	1000	Km app	PRKCQ (PKC theta)		ZLYTE	-6	-17	-12	11	Pass	Pass	0.76	P2996/26231	Pass
SSBK10488_30712	Cmpd1	1000	100	BRAF		ZLYTE	-18	-10	-14	8	Pass	Pass	0.83	PV3848/1258788	Pass
SSBK10488_30712	Cmpd1	1000	Km app	PRKCZ (PKC zeta)		ZLYTE	-18	-16	-17	2	Pass	Pass	0.7	P2273/31602	Pass
					58

## Sheet: Table S2b_IC50 graphs
						Table S2b
